# Supplementary material for: Towards the Human Colorectal Cancer Microbiome
Source: PubMed Central journal article supplement (PMC3101260; doi:10.1371/journal.pone.0020447), 2011-05-24
Supplement: pone.0020447.s002.pdf [file pone.0020447.s002.pdf]

**Figure S2. A**, Read lengths per sample, with  $X_{off}$  and  $X_{on}$  coming from off-tumor and on-tumor samples in subject X, the data was derived from the read lengths post-processing via the RDP pyropipeline [1]. **B**, Rarefaction curves for each sample, the sample key is the same as use for Figure S1. These curves were generated using MOTHUR [2,3], cut off values are shown. **C**, Venn diagram for paired samples generated using MOTHUR, each diagram shows the OTUs (at 0.03% cut-off) shared and those unique to each sample from on and off tumor. **D**, Principle component analysis of the annotated 16S rRNA sequence data generated for on and off tumor samples of each patient (A-F), was plotted as an 0.5 x 0.5 interval density distribution. The color coding shows the natural logarithm of the densities in each segment. Where there are significant differences ( $P < 0.05$ ) between tumor tissue and adjacent off-tumor mucosa, a white cross is shown in that segment. The taxonomic groups contributing to the most densely populated segments are shown (and the numbers of sequences contributing are shown in parentheses).

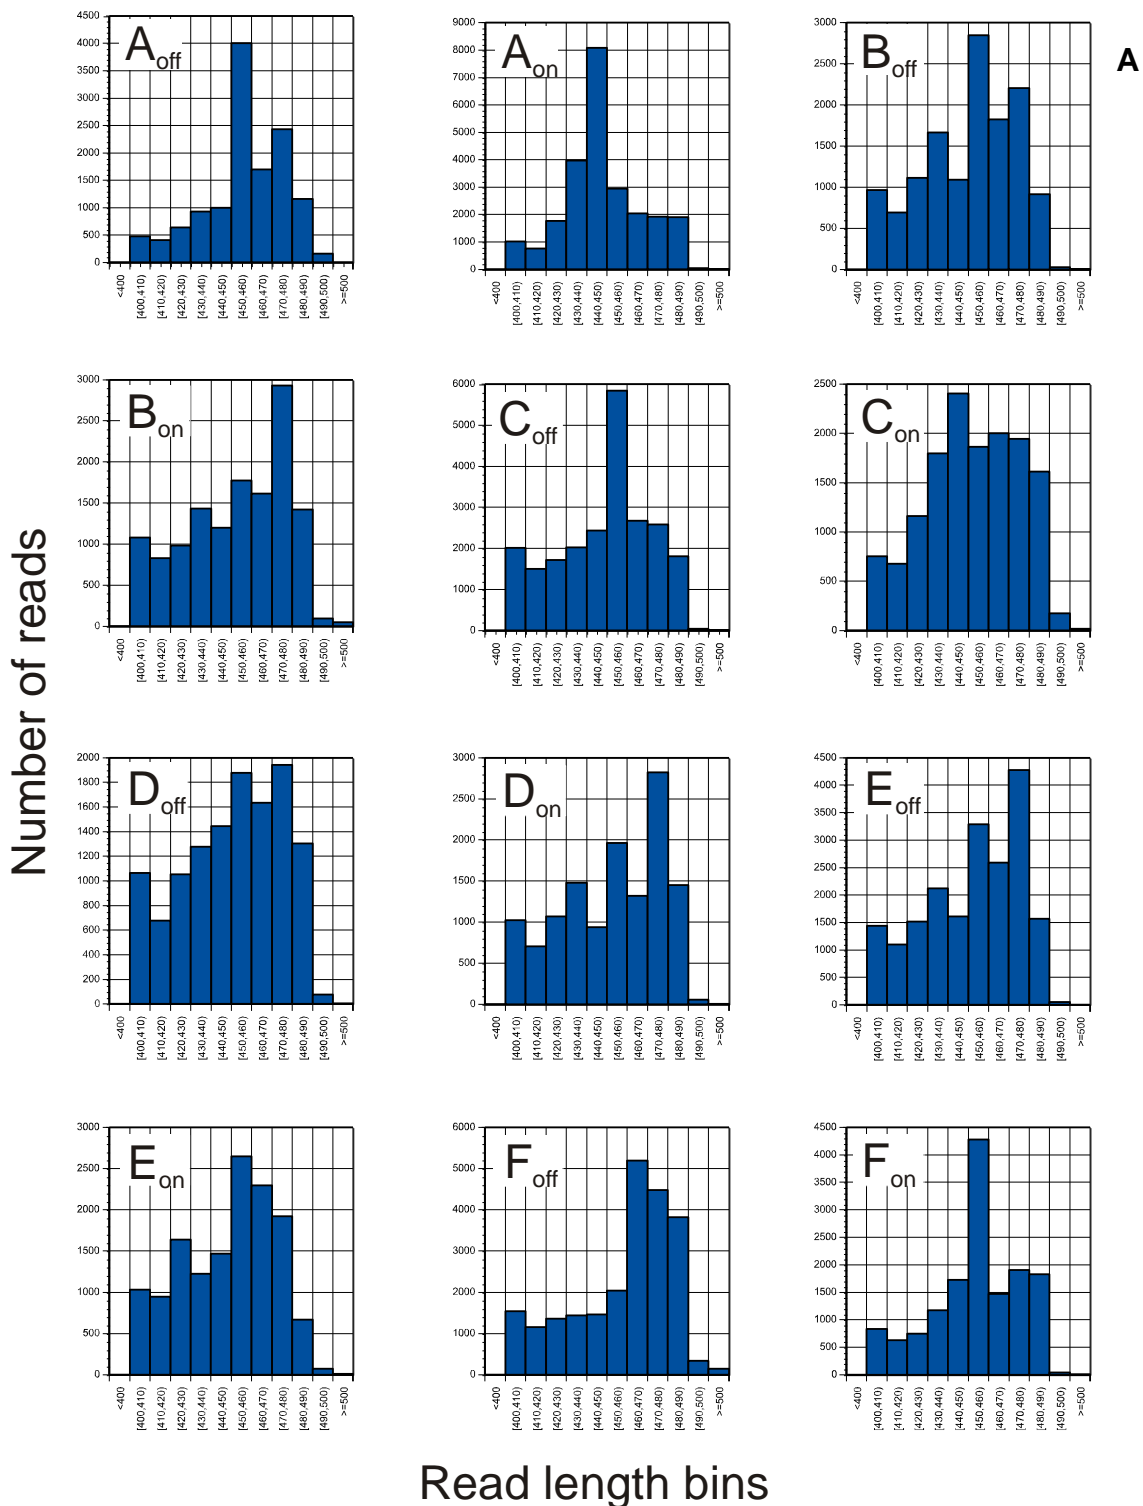

**B**

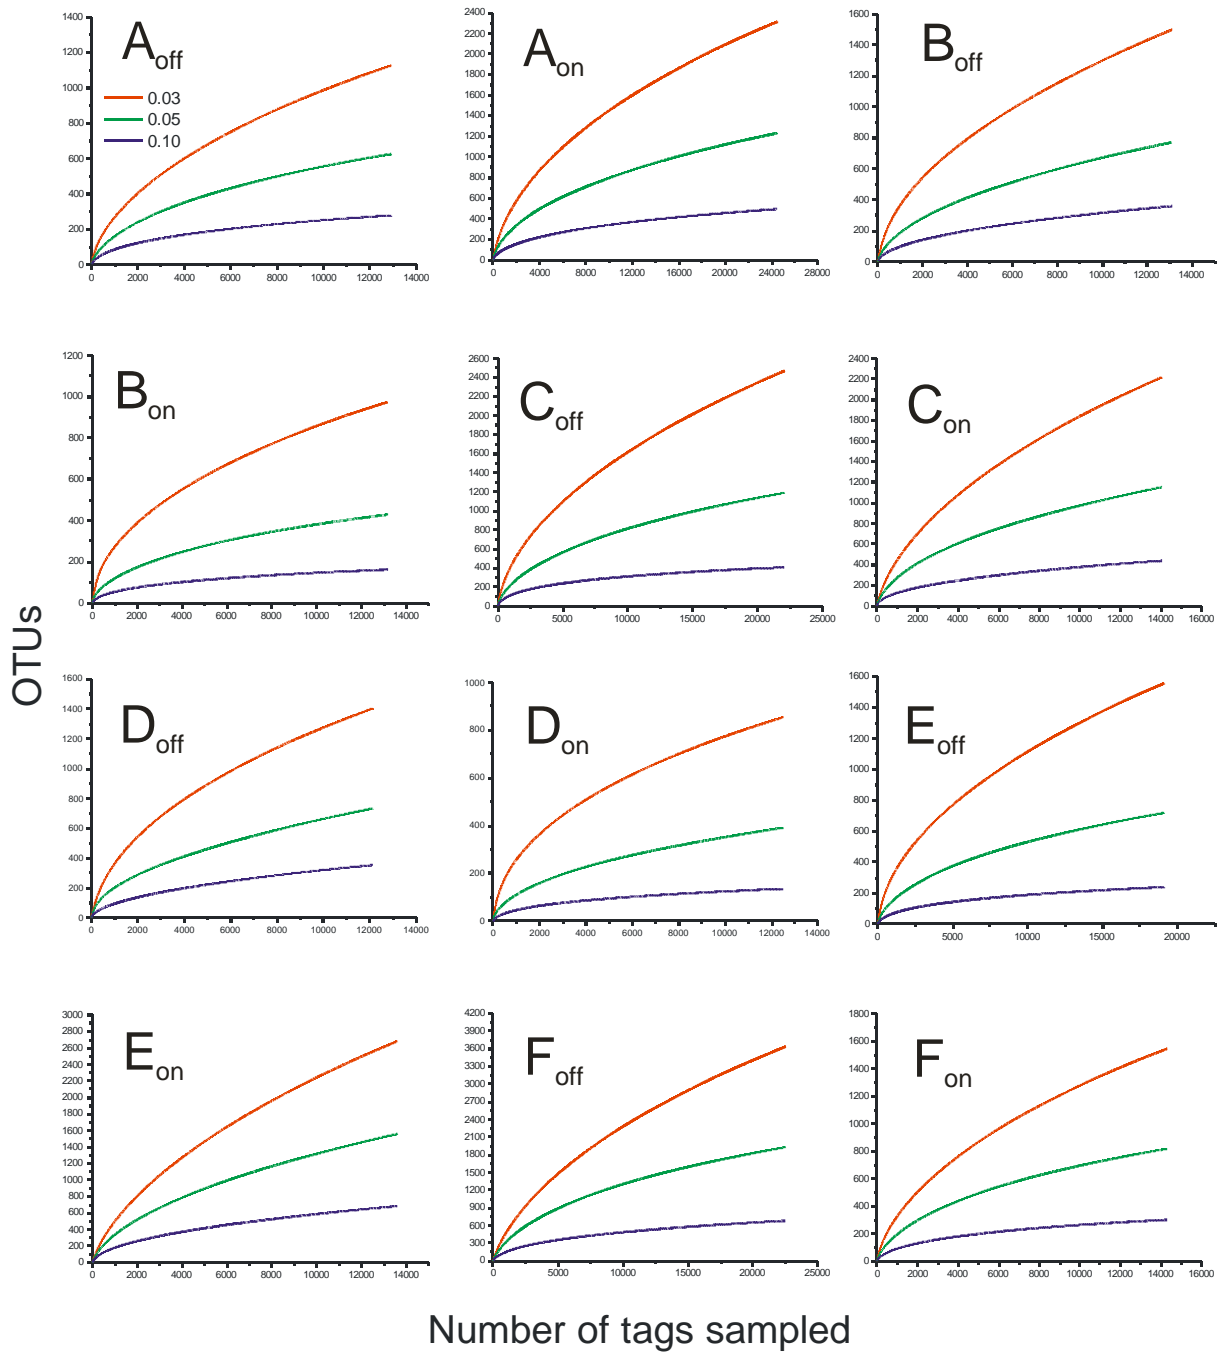

**C**

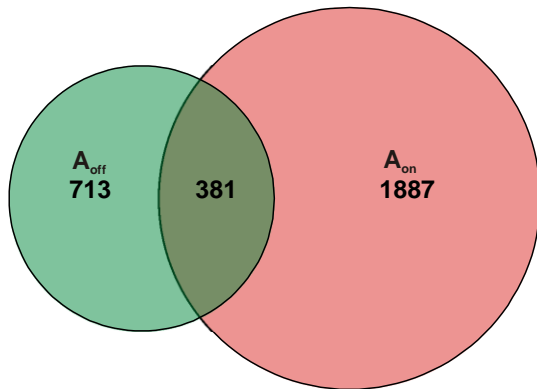

The number of species in group  $A_{off}$  is 1094  
 The number of species in group  $A_{on}$  is 2268  
 The number of species shared between groups  $A_{off}$  and  $A_{on}$  is 381  
 % of species that are shared in groups  $A_{off}$  and  $A_{on}$  is 12%  
 The total richness for all groups is 2981

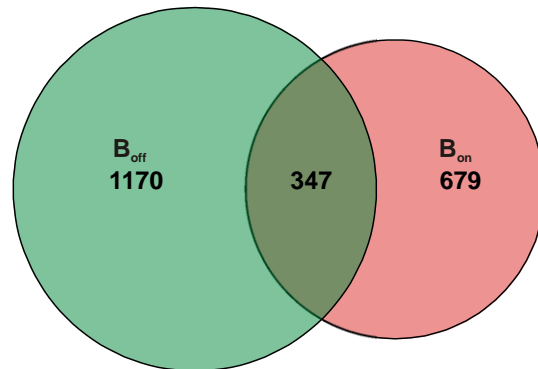

The number of species in group  $B_{off}$  is 1517  
 The number of species in group  $B_{on}$  is 1026  
 The number of species shared between groups  $B_{off}$  and  $B_{on}$  is 347  
 % of species that are shared in groups  $B_{off}$  and  $B_{on}$  is 16%  
 The total richness for all groups is 2196

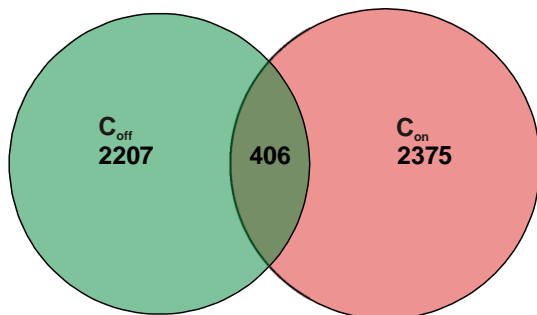

The number of species in group  $C_{off}$  is 2613  
 The number of species in group  $C_{on}$  is 2781  
 The number of species shared between groups  $C_{off}$  and  $C_{on}$  is 406  
 % of species that are shared in groups  $C_{off}$  and  $C_{on}$  is 8%  
 The total richness for all groups is 4988

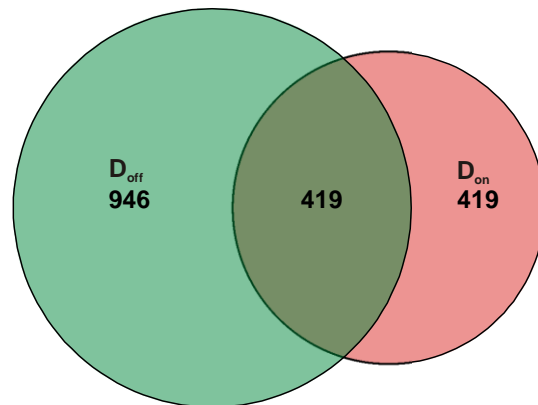

The number of species in group  $D_{off}$  is 1439  
 The number of species in group  $D_{on}$  is 912  
 The number of species shared between groups  $D_{off}$  and  $D_{on}$  is 493  
 % of species that are shared in groups  $D_{off}$  and  $D_{on}$  is 27%  
 The total richness for all groups is 1858

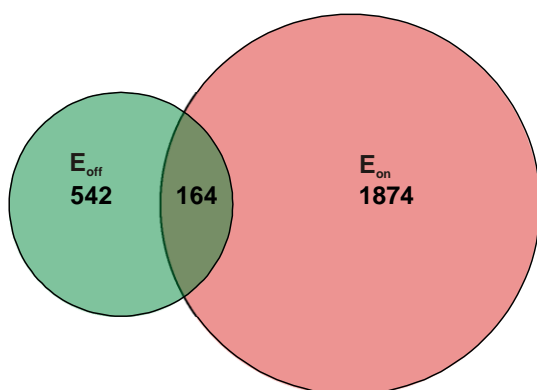

The number of species in group  $E_{off}$  is 706  
 The number of species in group  $E_{on}$  is 2038  
 The number of species shared between groups  $E_{off}$  and  $E_{on}$  is 164  
 % of species that are shared in groups  $E_{off}$  and  $E_{on}$  is 6%  
 The total richness for all groups is 2580

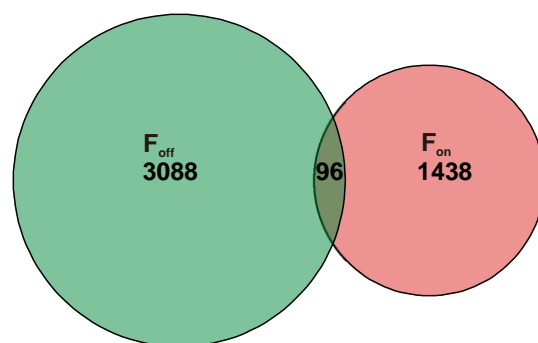

The number of species in group  $F_{off}$  is 3184  
 The number of species in group  $F_{on}$  is 1534  
 The number of species shared between groups  $F_{off}$  and  $F_{on}$  is 96  
 % of species that are shared in groups  $F_{off}$  and  $F_{on}$  is 2%  
 The total richness for all groups is 4622

D

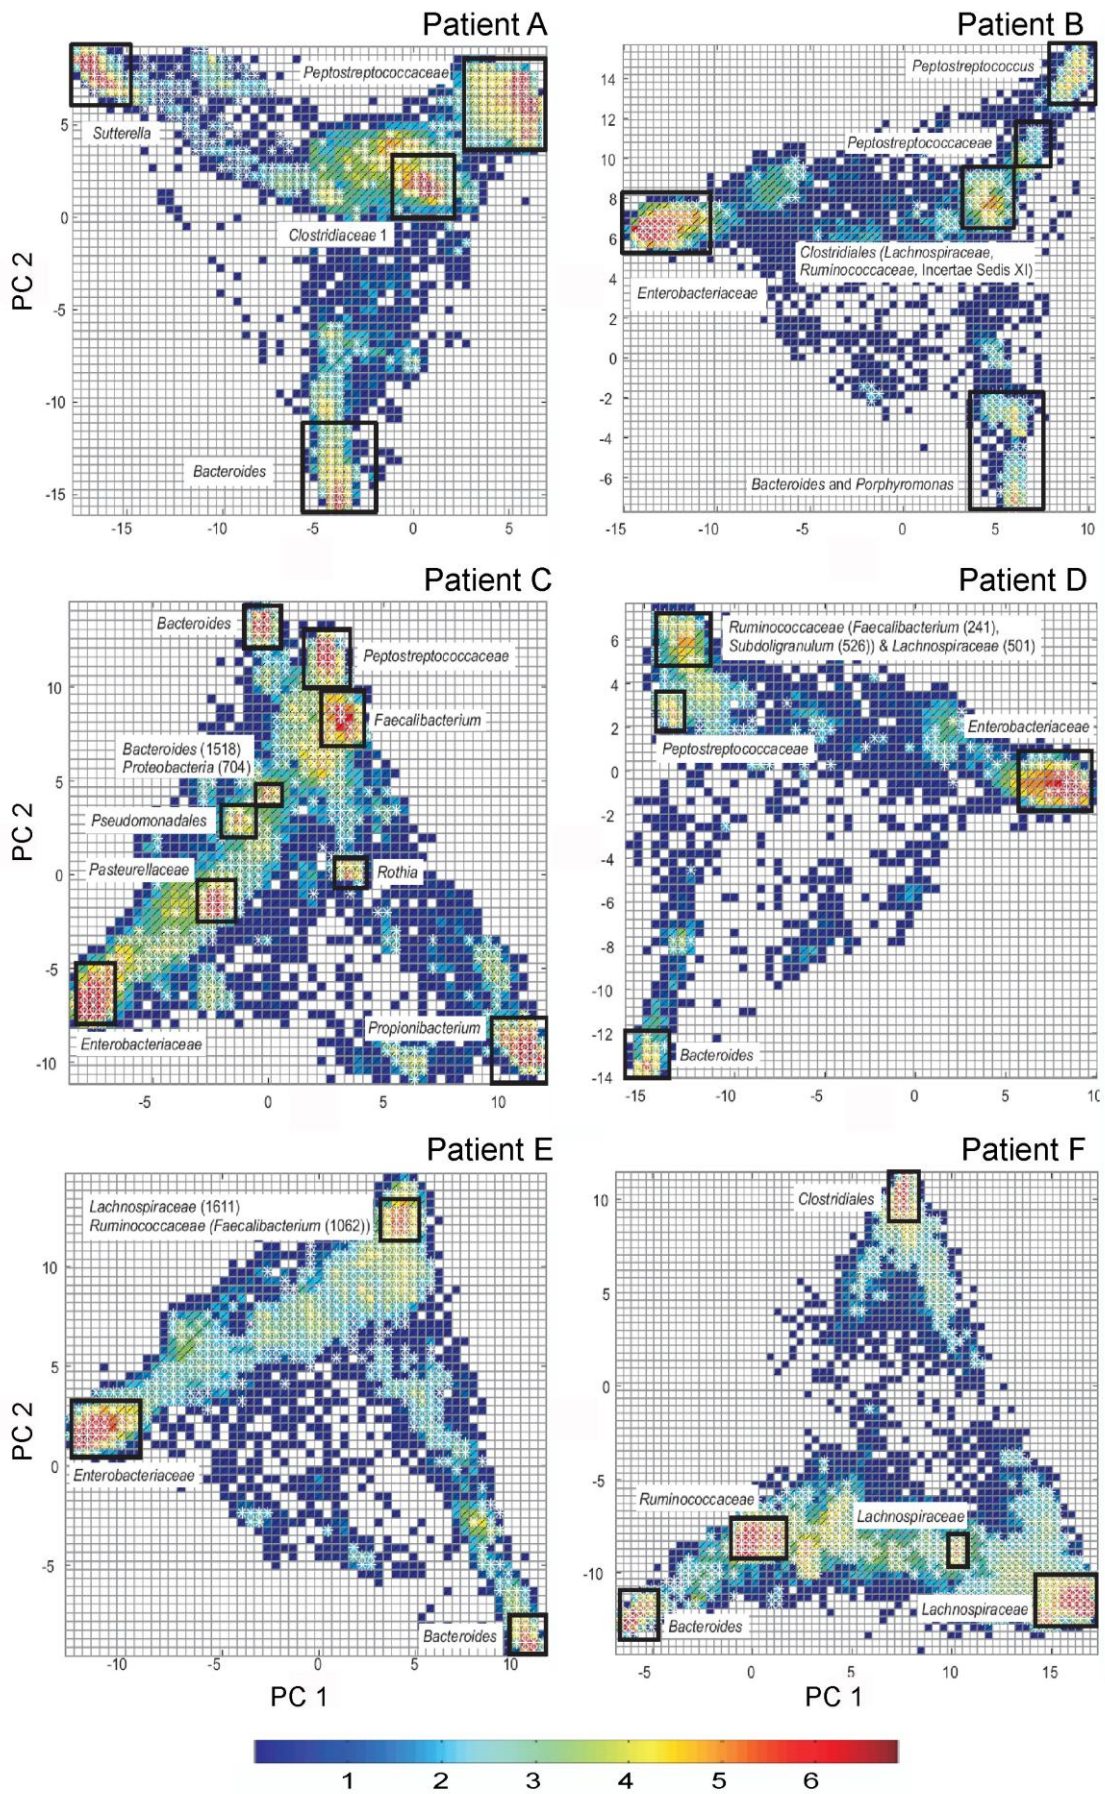

## REFERENCES

- 1 Cole JR et al. The Ribosomal Database Project: improved alignments and new tools for rRNA analysis. *Nucl Acids Res* 2009;37:D141-145.
- 2 Schloss PD et al. Introducing mothur: Open Source, Platform-independent, Community-supported Software for Describing and Comparing Microbial Communities. *Appl Environ Microbiol* 2009: AEM.01541-09.
- 3 Huson DH et al. Methods for comparative metagenomics. *BMC Bioinformatics* 2009;10 Suppl 1:S12.
