# Supplementary material for: Towards the Human Colorectal Cancer Microbiome
Source: PubMed Central journal article supplement (PMC3101260; doi:10.1371/journal.pone.0020447), 2011-05-24
Supplement: pone.0020447.s004.pdf [file pone.0020447.s004.pdf]

B

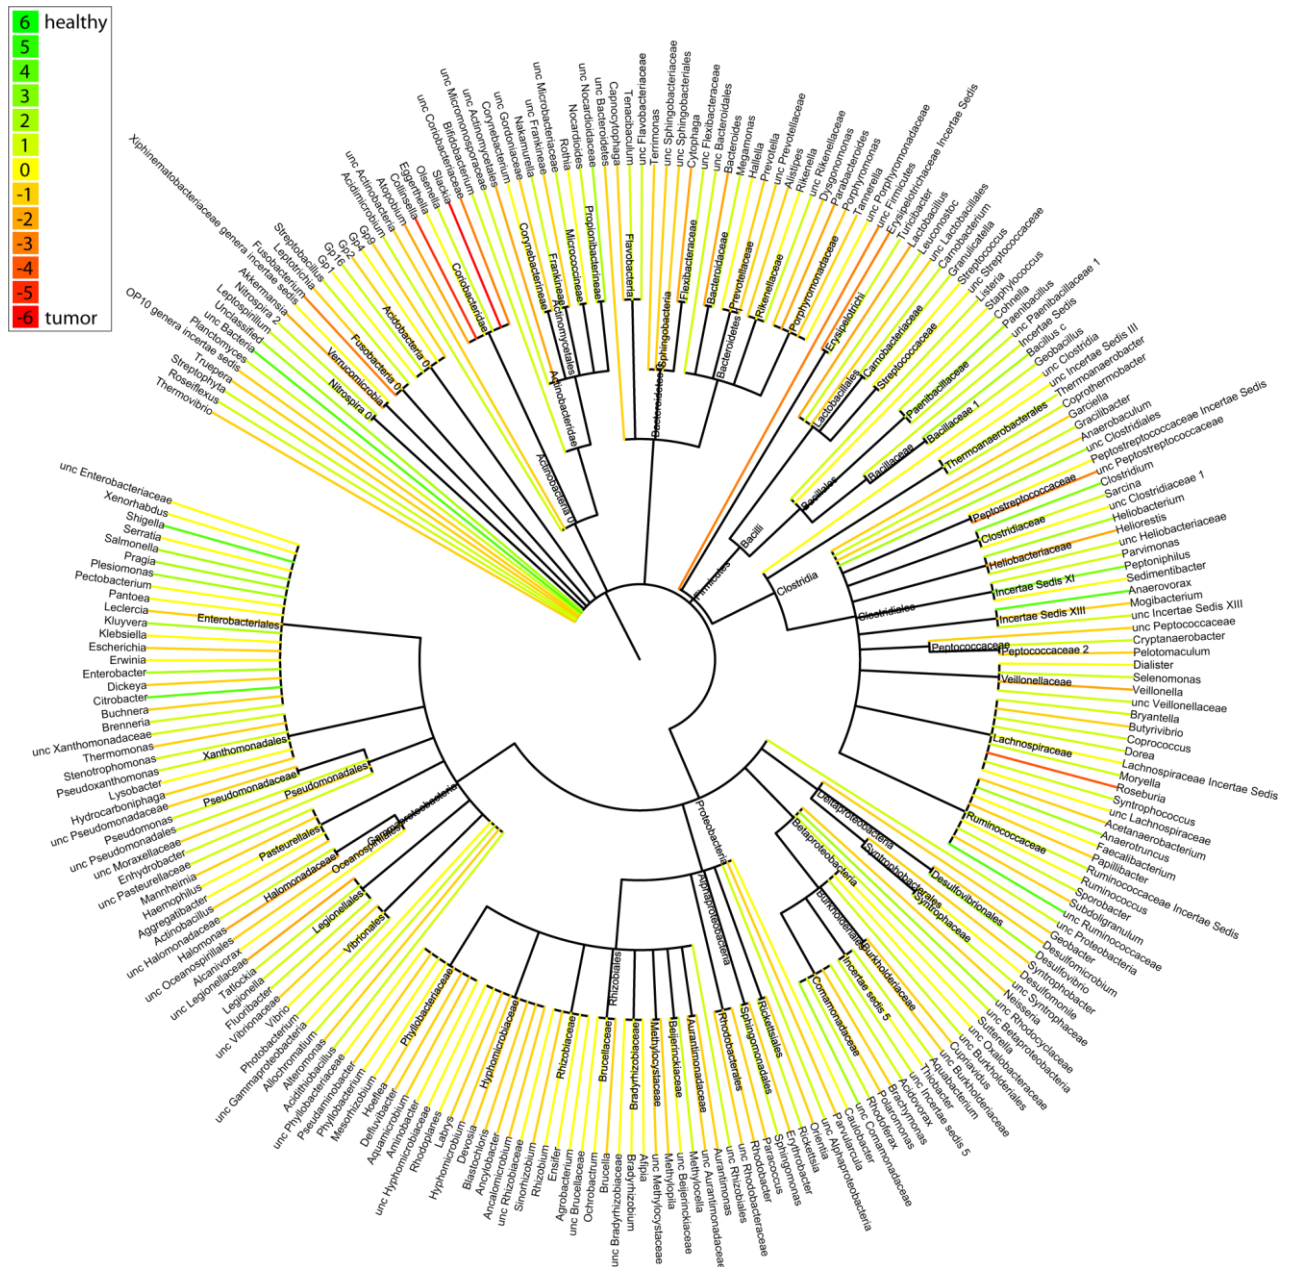

**C**

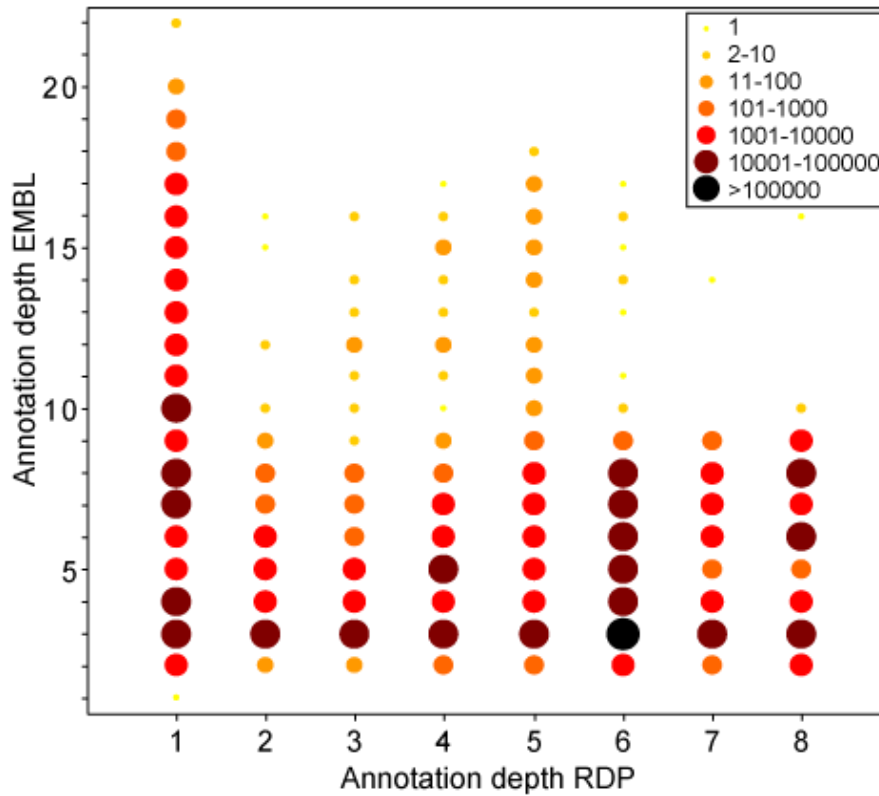

**REFERENCES**

1 Pruesse E, Quast C, Knittel K et al. SILVA: a comprehensive online resource for quality checked and aligned ribosomal RNA sequence data compatible with ARB. *Nucl Acids Res* 2007;35:7188-7196.
