# Supplementary material for: Towards the Human Colorectal Cancer Microbiome
Source: PubMed Central journal article supplement (PMC3101260; doi:10.1371/journal.pone.0020447), 2011-05-24
Supplement: pone.0020447.s005.pdf [file pone.0020447.s005.pdf]

**Table S1.** Primers used in this study.

| Primer                    | Reference  | Sequence                                                          |
|---------------------------|------------|-------------------------------------------------------------------|
| <b>DGGE</b>               |            |                                                                   |
| 27f                       | [1]        | 5' -AGAGTTTGATYMTGGCTCAG                                          |
| 1492r                     | [1]        | 5' -TACGGYTACCTTGTTACGACTT                                        |
| L1401r                    | [2]        | 5' -CGGTGTGTACAAGACCC                                             |
| 968f-GC                   | [2]        | 5' -CCCGCCGCGCCCCGCGCCCGTCCCCG<br>CCGCCCCCGCCCCGAACGCGAAGAACCTTAC |
| <b>RISA</b>               |            |                                                                   |
| 1406f                     | [3]        | 5' -TGYACACACCGCCCGT                                              |
| 23Sr                      | [3]        | 5' -GGGTTBCCCCATTTCRG                                             |
| <b>454 Pyrosequencing</b> |            |                                                                   |
| 16S_V1V3_MIDA_For         | This study | 5' -ACGAGTGCGTGCCTAACACATGCAAGTC                                  |
| 16S_V1V3_MIDA_Rev         | This study | 5' -ACGAGTGCGTATTACCGCGGCTGCTGG                                   |
| 16S_V1V3_MIDB_For         | This study | 5' -ACGCTCGACAGCCTAACACATGCAAGTC                                  |
| 16S_V1V3_MIDB_Rev         | This study | 5' -ACGCTCGACAATTACCGCGGCTGCTGG                                   |
| 16S_V1V3_MIDC_For         | This study | 5' -AGACGCACTCGCCTAACACATGCAAGTC                                  |
| 16S_V1V3_MIDC_Rev         | This study | 5' -AGACGCACTCATTACCGCGGCTGCTGG                                   |
| 16S_V1V3_MIDD_For         | This study | 5' -AGCACTGTAGGCCTAACACATGCAAGTC                                  |
| 16S_V1V3_MIDD_Rev         | This study | 5' -AGCACTGTAGATTACCGCGGCTGCTGG                                   |
| 16S_V1V3_MIDE_For         | This study | 5' -ATCAGACACGGCCTAACACATGCAAGTC                                  |
| 16S_V1V3_MIDE_Rev         | This study | 5' -ATCAGACACGATTACCGCGGCTGCTGG                                   |
| 16S_V1V3_MIDF_For         | This study | 5' -CGTGTCTCTAGCCTAACACATGCAAGTC                                  |
| 16S_V1V3_MIDF_Rev         | This study | 5' -CGTGTCTCTAATTACCGCGGCTGCTGG                                   |
| 16S_V1V3_MIDG_For         | This study | 5' -CTCGCGTGTTCGCCTAACACATGCAAGTC                                 |
| 16S_V1V3_MIDG_Rev         | This study | 5' -CTCGCGTGTTCATTACCGCGGCTGCTGG                                  |
| 16S_V1V3_MIDH_For         | This study | 5' -TAGTATCAGCGCCTAACACATGCAAGTC                                  |
| 16S_V1V3_MIDH_Rev         | This study | 5' -TAGTATCAGCATTACCGCGGCTGCTGG                                   |
| 16S_V1V3_MIDI_For         | This study | 5' -TCTCTATGCGGCCTAACACATGCAAGTC                                  |
| 16S_V1V3_MIDI_Rev         | This study | 5' -TCTCTATGCGATTACCGCGGCTGCTGG                                   |
| 16S_V1V3_MIDJ_For         | This study | 5' -TGATACGTCTGCCTAACACATGCAAGTC                                  |
| 16S_V1V3_MIDJ_Rev         | This study | 5' -TGATACGTCTATTACCGCGGCTGCTGG                                   |
| 16S_V1V3_MIDK_For         | This study | 5' -TACTGAGCTAGCCTAACACATGCAAGTC                                  |
| 16S_V1V3_MIDK_Rev         | This study | 5' -TACTGAGCTAATTACCGCGGCTGCTGG                                   |
| 16S_V1V3_MIDL_For         | This study | 5' -ATATCGCGAGGCCTAACACATGCAAGTC                                  |
| 16S_V1V3_MIDL_Rev         | This study | 5' -ATATCGCGAGATTACCGCGGCTGCTGG                                   |

1. Lane DJ *et al.* 16S/23S rRNA Sequencing. *Nucleic Acids Techniques in Bacterial Systematics*. Chichester: John Wiley & Sons, 1991:115-175.
2. Nubel U *et al.* Sequence heterogeneities of genes encoding 16S rRNAs in *Paenibacillus polymyxa* detected by temperature gradient gel electrophoresis. *J Bact* 1996;178:5636-5643.
3. Borneman J *et al.* Molecular microbial diversity in soils from eastern Amazonia: Evidence for unusual microorganisms and microbial population shifts associated with deforestation. *Appl Environ Microbiol* 1997;63:2647-2653.
