# Supplementary material for: Towards the Human Colorectal Cancer Microbiome
Source: PubMed Central journal article supplement (PMC3101260; doi:10.1371/journal.pone.0020447), 2011-05-24
Supplement: pone.0020447.s006.pdf [file pone.0020447.s006.pdf]

**Table S2.** MOTHUR diversity indices [1] of bacterial communities in samples on- and off-tumor ( $X_{on}$  and  $X_{off}$ , respectively).

| Sample/cutoff          | nseqs | sobs | ace      | ace_lci  | ace_hci  | chao    | chao_lci | chao_hci | shannon | shannon_lci | shannon_hci | simpson | simpson_lci | simpson_hci | coverage |
|------------------------|-------|------|----------|----------|----------|---------|----------|----------|---------|-------------|-------------|---------|-------------|-------------|----------|
| <b>A<sub>off</sub></b> |       |      |          |          |          |         |          |          |         |             |             |         |             |             |          |
| 0.03                   |       | 1128 | 2951.08  | 2814.37  | 3098.88  | 2097.49 | 1899.07  | 2346.98  | 5.04    | 5.00        | 5.07        | 0.0191  | 0.0184      | 0.0199      | 0.9553   |
| 0.05                   | 12921 | 626  | 1341.99  | 1295.93  | 1391.21  | 1031.92 | 921.48   | 1183.64  | 3.68    | 3.65        | 3.72        | 0.0795  | 0.0769      | 0.0822      | 0.9780   |
| 0.10                   |       | 279  | 515.65   | 461.00   | 586.71   | 415.88  | 362.08   | 504.53   | 2.17    | 2.13        | 2.21        | 0.2914  | 0.2851      | 0.2977      | 0.9916   |
| <b>A<sub>on</sub></b>  |       |      |          |          |          |         |          |          |         |             |             |         |             |             |          |
| 0.03                   |       | 2313 | 5854.35  | 5706.74  | 6008.37  | 4155.88 | 3881.76  | 4477.91  | 5.64    | 5.61        | 5.66        | 0.0173  | 0.0167      | 0.0180      | 0.9528   |
| 0.05                   | 24462 | 1233 | 2907.68  | 2799.21  | 3023.66  | 2173.91 | 1981.80  | 2415.30  | 4.44    | 4.41        | 4.47        | 0.0520  | 0.0504      | 0.0536      | 0.9765   |
| 0.10                   |       | 496  | 909.08   | 834.74   | 999.74   | 751.61  | 671.18   | 868.97   | 3.02    | 3.00        | 3.05        | 0.1545  | 0.1508      | 0.1582      | 0.9920   |
| <b>B<sub>off</sub></b> |       |      |          |          |          |         |          |          |         |             |             |         |             |             |          |
| 0.03                   |       | 1499 | 4382.02  | 4246.81  | 4523.89  | 3085.00 | 2794.57  | 3440.53  | 5.80    | 5.77        | 5.83        | 0.0082  | 0.0078      | 0.0086      | 0.9394   |
| 0.05                   | 13085 | 771  | 2092.14  | 1982.20  | 2212.05  | 1470.50 | 1299.11  | 1697.51  | 4.20    | 4.17        | 4.23        | 0.0427  | 0.0413      | 0.0441      | 0.9701   |
| 0.10                   |       | 359  | 926.29   | 827.73   | 1045.59  | 641.81  | 545.80   | 787.16   | 2.55    | 2.51        | 2.59        | 0.2550  | 0.2475      | 0.2624      | 0.9869   |
| <b>B<sub>on</sub></b>  |       |      |          |          |          |         |          |          |         |             |             |         |             |             |          |
| 0.03                   |       | 975  | 2233.03  | 2140.54  | 2332.86  | 1630.64 | 1482.67  | 1821.74  | 5.33    | 5.30        | 5.36        | 0.0103  | 0.0099      | 0.0107      | 0.9662   |
| 0.05                   | 13149 | 429  | 806.32   | 734.24   | 895.41   | 633.95  | 567.63   | 732.00   | 3.63    | 3.60        | 3.66        | 0.0569  | 0.0553      | 0.0584      | 0.9865   |
| 0.10                   |       | 162  | 278.83   | 242.65   | 331.23   | 228.12  | 195.86   | 291.13   | 1.71    | 1.67        | 1.74        | 0.4126  | 0.4031      | 0.4221      | 0.9956   |
| <b>C<sub>off</sub></b> |       |      |          |          |          |         |          |          |         |             |             |         |             |             |          |
| 0.03                   |       | 2470 | 6735.92  | 6565.57  | 6913.36  | 4522.41 | 4229.61  | 4863.94  | 5.99    | 5.97        | 6.02        | 0.0123  | 0.0117      | 0.0130      | 0.9425   |
| 0.05                   | 22080 | 1190 | 2501.43  | 2396.20  | 2615.84  | 1921.53 | 1770.97  | 2111.11  | 4.57    | 4.54        | 4.60        | 0.0326  | 0.0316      | 0.0336      | 0.9757   |
| 0.10                   |       | 407  | 546.17   | 503.83   | 607.04   | 542.61  | 492.90   | 621.10   | 3.04    | 3.01        | 3.06        | 0.1415  | 0.1384      | 0.1447      | 0.9942   |
| <b>C<sub>on</sub></b>  |       |      |          |          |          |         |          |          |         |             |             |         |             |             |          |
| 0.03                   |       | 2218 | 6187.86  | 6017.08  | 6366.31  | 4258.75 | 3956.72  | 4613.24  | 6.19    | 6.16        | 6.22        | 0.0067  | 0.0064      | 0.0070      | 0.9150   |
| 0.05                   | 14051 | 1153 | 2845.02  | 2721.74  | 2977.99  | 2039.14 | 1856.60  | 2269.04  | 5.02    | 4.99        | 5.06        | 0.0205  | 0.0197      | 0.0213      | 0.9602   |
| 0.10                   |       | 440  | 937.29   | 846.71   | 1048.05  | 741.95  | 644.91   | 884.96   | 3.57    | 3.53        | 3.60        | 0.0737  | 0.0715      | 0.0758      | 0.9862   |
| <b>D<sub>off</sub></b> |       |      |          |          |          |         |          |          |         |             |             |         |             |             |          |
| 0.03                   |       | 1405 | 3453.26  | 3342.86  | 3569.95  | 2454.11 | 2257.28  | 2696.41  | 5.64    | 5.61        | 5.67        | 0.0134  | 0.0127      | 0.0142      | 0.9438   |
| 0.05                   | 12146 | 734  | 2178.68  | 2086.93  | 2276.66  | 1411.88 | 1242.79  | 1637.18  | 4.58    | 4.55        | 4.61        | 0.0303  | 0.0289      | 0.0317      | 0.9690   |
| 0.10                   |       | 354  | 932.12   | 829.64   | 1056.67  | 621.11  | 531.87   | 755.10   | 2.82    | 2.79        | 2.86        | 0.1904  | 0.1837      | 0.1971      | 0.9856   |
| <b>D<sub>on</sub></b>  |       |      |          |          |          |         |          |          |         |             |             |         |             |             |          |
| 0.03                   |       | 855  | 1807.15  | 1716.57  | 1907.25  | 1429.80 | 1289.58  | 1615.26  | 5.16    | 5.14        | 5.19        | 0.0122  | 0.0117      | 0.0126      | 0.9700   |
| 0.05                   | 12499 | 392  | 923.86   | 830.84   | 1036.60  | 746.58  | 627.08   | 926.84   | 3.48    | 3.45        | 3.51        | 0.0627  | 0.0612      | 0.0642      | 0.9852   |
| 0.10                   |       | 136  | 236.56   | 203.85   | 285.04   | 194.33  | 164.42   | 255.75   | 1.39    | 1.36        | 1.42        | 0.5296  | 0.5190      | 0.5403      | 0.9960   |
| <b>E<sub>off</sub></b> |       |      |          |          |          |         |          |          |         |             |             |         |             |             |          |
| 0.03                   |       | 1556 | 4060.41  | 3929.59  | 4198.43  | 2869.96 | 2635.05  | 3156.01  | 5.52    | 5.49        | 5.54        | 0.0105  | 0.0102      | 0.0109      | 0.9590   |
| 0.05                   | 19112 | 718  | 1447.16  | 1387.00  | 1512.72  | 1110.50 | 1009.77  | 1246.01  | 3.89    | 3.86        | 3.91        | 0.0517  | 0.0504      | 0.0530      | 0.9835   |
| 0.10                   |       | 239  | 406.01   | 362.51   | 464.82   | 339.09  | 295.77   | 415.47   | 2.21    | 2.18        | 2.24        | 0.2371  | 0.2324      | 0.2417      | 0.9957   |
| <b>E<sub>on</sub></b>  |       |      |          |          |          |         |          |          |         |             |             |         |             |             |          |
| 0.03                   |       | 2687 | 8508.43  | 8293.10  | 8732.04  | 5749.53 | 5337.71  | 6225.34  | 6.53    | 6.50        | 6.56        | 0.0042  | 0.0040      | 0.0044      | 0.8858   |
| 0.05                   | 13589 | 1559 | 4341.31  | 4191.59  | 4499.54  | 3096.00 | 2824.80  | 3425.29  | 5.50    | 5.47        | 5.53        | 0.0137  | 0.0131      | 0.0143      | 0.9386   |
| 0.10                   |       | 686  | 1782.97  | 1707.44  | 1864.08  | 1283.97 | 1127.29  | 1496.27  | 4.08    | 4.05        | 4.12        | 0.0660  | 0.0631      | 0.0689      | 0.9754   |
| <b>F<sub>off</sub></b> |       |      |          |          |          |         |          |          |         |             |             |         |             |             |          |
| 0.03                   |       | 3639 | 10277.14 | 10063.30 | 10498.09 | 7508.11 | 7050.17  | 8027.53  | 6.42    | 6.39        | 6.44        | 0.0079  | 0.0075      | 0.0082      | 0.9103   |
| 0.05                   | 22502 | 1932 | 3965.83  | 3857.42  | 4080.34  | 3175.60 | 2969.75  | 3422.28  | 5.15    | 5.12        | 5.18        | 0.0300  | 0.0290      | 0.0310      | 0.9609   |
| 0.10                   |       | 682  | 1278.56  | 1235.96  | 1324.43  | 1110.13 | 990.81   | 1275.53  | 3.32    | 3.28        | 3.35        | 0.1630  | 0.1586      | 0.1674      | 0.9878   |
| <b>F<sub>on</sub></b>  |       |      |          |          |          |         |          |          |         |             |             |         |             |             |          |
| 0.03                   |       | 1547 | 4078.84  | 3953.77  | 4210.40  | 2997.51 | 2739.83  | 3310.85  | 5.44    | 5.41        | 5.47        | 0.0140  | 0.0135      | 0.0146      | 0.9432   |
| 0.05                   | 14284 | 820  | 1631.65  | 1567.66  | 1701.11  | 1344.33 | 1215.80  | 1514.61  | 4.14    | 4.10        | 4.17        | 0.0538  | 0.0519      | 0.0557      | 0.9745   |
| 0.10                   |       | 302  | 425.11   | 384.70   | 485.25   | 415.75  | 370.89   | 489.82   | 2.61    | 2.58        | 2.64        | 0.1908  | 0.1861      | 0.1955      | 0.9926   |

Nseqs: number of reads analysed, sobs: species observed at the cut-off value, ace: abundance-based coverage estimator, chao: abundance-based estimator Chao1, Shannon: Shannon index of diversity, Simpson: Simpson index of diversity, Coverage: Good's coverage. LCI and HCI: lower and higher confidence interval, respectively.

1. Schloss PD et al Introducing mothur: Open Source, Platform-independent, Community-supported Software for Describing and Comparing Microbial Communities. *Appl Environ Microbiol* 2009;75:7537-7541.
