# Supplementary material for: Towards the Human Colorectal Cancer Microbiome
Source: PLoS One. 2011 May 24;6(5):e20447. doi: 10.1371/journal.pone.0020447 (PMC3101260; doi:10.1371/journal.pone.0020447)
Supplement: Table S4 — Consistency scores for CRC associated microbiome shifts. (XLS) [file pone.0020447.s008.xls]

## Sheet: Table S4
Table S4A. Consistency scores for CRC associated microbiome shifts - EMBL													Patients A-F; off = off-tumor; on = tumor; f.1-12 = fraction of sequence read
													Aoff	Aon	Boff	Bon	Coff	Con	Doff	Don	Eoff	Eon	Foff	Fon	score						consistency
Terminal Clade	n.1	n.2	n.3	n.4	n.5	n.6	n.7	n.8	n.9	n.10	n.11	n.12	f.1	f.2	f.3	f.4	f.5	f.6	f.7	f.8	f.9	f.10	f.11	f.12	1<>2	3<>4	5<>6	7<>8	9<>10	11<>12	score
Bacteria;Proteobacteria;Gammaproteobacteria;Enterobacteriales;Enterobacteriaceae;Citrobacter	7	3	191	51	216	54	73	62	85	121	10	6	0.00225952	0.000355198	0.00900137	0.00201661	0.0100695	0.00681216	0.00339645	0.00324658	0.0031485	0.00127979	0.001343	0.000892724	1	1	1	1	1	1	6
Bacteria;Firmicutes;Clostridia;Clostridiales;Eubacteriaceae;environmental samples	2	0	1	0	0	0	5	0	0	0	6	0	0.000645578	0	4.71276e-05	0	0	0	0.000232634	0	0	0	0.000805802	0	1	1	0	1	0	1	4
Bacteria;Proteobacteria;Gammaproteobacteria;Enterobacteriales;Enterobacteriaceae;Cronobacter	0	0	36	18	41	13	67	26	72	80	0	0	0	0	0.00169659	0.000711744	0.00191133	0.00163996	0.00311729	0.00136147	0.00266696	0.00084614	0	0	0	1	1	1	1	0	4
Bacteria;Proteobacteria;Gammaproteobacteria;Enterobacteriales;Enterobacteriaceae;Kluyvera	1	0	5	5	3	1	6	5	5	5	0	3	0.000322789	0	0.000235638	0.000197707	0.000139854	0.000126151	0.000279161	0.000261821	0.000185206	5.28838e-05	0	0.000446362	1	1	1	1	1	-1	4
Bacteria;Proteobacteria;Gammaproteobacteria;Enterobacteriales;Enterobacteriaceae;Salmonella;Salmonella enterica subsp. enterica serovar Saintpaul	0	0	1	0	1	0	1	0	1	0	0	0	0	0	4.71276e-05	0	4.66179e-05	0	4.65268e-05	0	3.70412e-05	0	0	0	0	1	1	1	1	0	4
Bacteria;Proteobacteria;Gammaproteobacteria;Enterobacteriales;Enterobacteriaceae;Serratia	0	0	4	0	10	1	10	2	4	7	0	0	0	0	0.00018851	0	0.000466179	0.000126151	0.000465268	0.000104728	0.000148165	7.40373e-05	0	0	0	1	1	1	1	0	4
Bacteria;Proteobacteria;Gammaproteobacteria;Enterobacteriales;Enterobacteriaceae;Shigella	3	2	226	122	223	52	139	48	50	158	6	43	0.000968367	0.000236798	0.0106508	0.00482404	0.0103958	0.00655986	0.00646722	0.00251348	0.00185206	0.00167113	0.000805802	0.00639786	1	1	1	1	1	-1	4
Bacteria;Actinobacteria;Actinobacteridae;Actinomycetales;Micrococcineae;Microbacteriaceae;Microbacterium	0	0	3	2	3	0	5	1	1	0	0	1	0	0	0.000141383	7.90826e-05	0.000139854	0	0.000232634	5.23642e-05	3.70412e-05	0	0	0.000148787	0	1	1	1	1	-1	3
Bacteria;Proteobacteria;Gammaproteobacteria;Enterobacteriales;Enterobacteriaceae;Salmonella;Salmonella enterica subsp. enterica serovar Paratyphi B	0	0	3	0	0	0	7	0	19	0	0	0	0	0	0.000141383	0	0	0	0.000325687	0	0.000703782	0	0	0	0	1	0	1	1	0	3
Bacteria;Actinobacteria;Actinobacteridae;Actinomycetales;Propionibacterineae;Nocardioidaceae;Nocardioides;environmental samples	0	0	20	20	17	5	6	14	21	6	0	0	0	0	0.000942551	0.000790826	0.000792504	0.000630756	0.000279161	0.000733099	0.000777864	6.34605e-05	0	0	0	1	1	-1	1	0	2
Bacteria;Actinobacteria;Actinobacteridae;Actinomycetales;environmental samples	0	0	12	11	11	2	3	9	10	6	0	0	0	0	0.000565531	0.000434955	0.000512797	0.000252302	0.00013958	0.000471278	0.000370412	6.34605e-05	0	0	0	1	1	-1	1	0	2
Bacteria;Chloroflexi;environmental samples	1	0	0	0	0	0	0	0	0	0	2	0	0.000322789	0	0	0	0	0	0	0	0	0	0.000268601	0	1	0	0	0	0	1	2
Bacteria;Firmicutes;Bacillales;Paenibacillaceae;Paenibacillus	0	0	0	0	9	0	0	0	0	0	1	0	0	0	0	0	0.000419561	0	0	0	0	0	0.0001343	0	0	0	1	0	0	1	2
Bacteria;Firmicutes;Clostridia;Clostridiales;Clostridiaceae;Clostridium	34	33	2	0	1	1	2	0	0	0	0	0	0.0109748	0.00390717	9.42551e-05	0	4.66179e-05	0.000126151	9.30536e-05	0	0	0	0	0	1	1	-1	1	0	0	2
Bacteria;Firmicutes;Clostridia;Clostridiales;Heliobacteriaceae;Heliobacillus	1	0	0	0	1	0	0	0	0	0	0	0	0.000322789	0	0	0	4.66179e-05	0	0	0	0	0	0	0	1	0	1	0	0	0	2
Bacteria;Firmicutes;Clostridia;Clostridiales;Ruminococcaceae;Ruminococcus	1	0	0	0	0	0	1	0	4	0	0	3	0.000322789	0	0	0	0	0	4.65268e-05	0	0.000148165	0	0	0.000446362	1	0	0	1	1	-1	2
Bacteria;Firmicutes;Clostridia;Clostridiales;environmental samples	1	0	0	0	0	0	0	0	0	0	1	0	0.000322789	0	0	0	0	0	0	0	0	0	0.0001343	0	1	0	0	0	0	1	2
Bacteria;Firmicutes;Clostridia;environmental samples	4	9	0	0	30	1	0	0	0	0	0	0	0.00129116	0.00106559	0	0	0.00139854	0.000126151	0	0	0	0	0	0	1	0	1	0	0	0	2
Bacteria;Firmicutes;Lactobacillales;Carnobacteriaceae;Granulicatella;environmental samples	10	0	1	0	0	22	3	0	0	0	0	0	0.00322789	0	4.71276e-05	0	0	0.00277532	0.00013958	0	0	0	0	0	1	1	-1	1	0	0	2
Bacteria;Proteobacteria;Gammaproteobacteria;Enterobacteriales;Enterobacteriaceae	4	4	325	337	234	94	420	339	486	125	4	61	0.00129116	0.000473597	0.0153165	0.0133254	0.0109086	0.0118582	0.0195412	0.0177515	0.018002	0.00132209	0.000537201	0.00907603	1	1	-1	1	1	-1	2
Bacteria;Proteobacteria;Gammaproteobacteria;Enterobacteriales;Enterobacteriaceae;Enterobacter	18	11	771	655	662	247	848	416	657	423	35	178	0.0058102	0.00130239	0.0363354	0.0258996	0.030861	0.0311593	0.0394547	0.0217835	0.024336	0.00447397	0.00470051	0.0264842	1	1	-1	1	1	-1	2
Bacteria;Proteobacteria;Gammaproteobacteria;Enterobacteriales;Enterobacteriaceae;Escherichia	3	1	732	474	513	211	420	315	422	387	0	102	0.000968367	0.000118399	0.0344974	0.0187426	0.023915	0.0266179	0.0195412	0.0164947	0.0156314	0.0040932	0	0.0151763	1	1	-1	1	1	-1	2
Bacteria;Proteobacteria;Gammaproteobacteria;Enterobacteriales;Enterobacteriaceae;Klebsiella	1	0	197	259	118	41	233	124	227	88	3	46	0.000322789	0	0.00928413	0.0102412	0.00550091	0.0051722	0.0108407	0.00649317	0.00840834	0.000930754	0.000402901	0.00684422	1	-1	1	1	1	-1	2
Bacteria;Proteobacteria;Gammaproteobacteria;Enterobacteriales;Enterobacteriaceae;Pectobacterium	0	2	168	115	129	45	67	44	66	91	0	11	0	0.000236798	0.00791743	0.00454725	0.00601371	0.0056768	0.00311729	0.00230403	0.00244472	0.000962484	0	0.00163666	-1	1	1	1	1	-1	2
Bacteria;Proteobacteria;Gammaproteobacteria;Enterobacteriales;Enterobacteriaceae;Pragia	1	0	171	66	25	42	36	18	31	4	1	7	0.000322789	0	0.00805882	0.00260973	0.00116545	0.00529835	0.00167496	0.000942556	0.00114828	4.2307e-05	0.0001343	0.00104151	1	1	-1	1	1	-1	2
Bacteria;Proteobacteria;Gammaproteobacteria;Enterobacteriales;Enterobacteriaceae;Salmonella;Salmonella enterica subsp. enterica serovar Paratyphi C	1	0	3	5	11	3	11	6	8	4	0	1	0.000322789	0	0.000141383	0.000197707	0.000512797	0.000378453	0.000511795	0.000314185	0.000296329	4.2307e-05	0	0.000148787	1	-1	1	1	1	-1	2
Bacteria;Proteobacteria;Gammaproteobacteria;Enterobacteriales;Enterobacteriaceae;Salmonella;Salmonella enterica subsp. enterica serovar Virchow	0	0	0	0	0	0	1	0	2	0	0	0	0	0	0	0	0	0	4.65268e-05	0	7.40823e-05	0	0	0	0	0	0	1	1	0	2
Bacteria;Proteobacteria;Gammaproteobacteria;Pseudomonadales;Moraxellaceae;Acinetobacter	0	0	17	8	1	6	4	1	4	4	0	0	0	0	0.000801169	0.000316331	4.66179e-05	0.000756907	0.000186107	5.23642e-05	0.000148165	4.2307e-05	0	0	0	1	-1	1	1	0	2
Bacteria;Proteobacteria;Gammaproteobacteria;Vibrionales;Vibrionaceae;Photobacterium	0	0	1	0	0	0	0	0	1	0	0	0	0	0	4.71276e-05	0	0	0	0	0	3.70412e-05	0	0	0	0	1	0	0	1	0	2
other sequences;artificial sequences	0	0	6	6	3	6	3	0	9	0	0	0	0	0	0.000282765	0.000237248	0.000139854	0.000756907	0.00013958	0	0.00033337	0	0	0	0	1	-1	1	1	0	2
Bacteria;Acidobacteria;environmental samples	1	0	0	0	0	0	0	0	0	0	0	0	0.000322789	0	0	0	0	0	0	0	0	0	0	0	1	0	0	0	0	0	1
Bacteria;Actinobacteria;Actinobacteridae;Actinomycetales	0	0	0	0	1	0	0	0	0	0	0	0	0	0	0	0	4.66179e-05	0	0	0	0	0	0	0	0	0	1	0	0	0	1
Bacteria;Actinobacteria;Actinobacteridae;Actinomycetales;Corynebacterineae;Corynebacteriaceae;Corynebacterium;environmental samples	0	0	0	0	2	0	0	0	0	0	0	0	0	0	0	0	9.32357e-05	0	0	0	0	0	0	0	0	0	1	0	0	0	1
Bacteria;Actinobacteria;Actinobacteridae;Actinomycetales;Micromonosporineae;Micromonosporaceae;Salinispora	0	0	0	0	1	0	0	0	0	0	0	0	0	0	0	0	4.66179e-05	0	0	0	0	0	0	0	0	0	1	0	0	0	1
Bacteria;Actinobacteria;Coriobacteridae;Coriobacteriales;Coriobacterineae;Coriobacteriaceae	0	0	6	0	0	0	0	0	0	0	0	0	0	0	0.000282765	0	0	0	0	0	0	0	0	0	0	1	0	0	0	0	1
Bacteria;Bacteroidetes;Bacteroidia;Bacteroidales;Porphyromonadaceae;Porphyromonas	0	0	1	0	0	0	0	0	0	0	0	0	0	0	4.71276e-05	0	0	0	0	0	0	0	0	0	0	1	0	0	0	0	1
Bacteria;Bacteroidetes;Flavobacteria;Flavobacteriales;Flavobacteriaceae;Aequorivita;environmental samples	1	0	0	0	0	0	0	0	0	0	0	0	0.000322789	0	0	0	0	0	0	0	0	0	0	0	1	0	0	0	0	0	1
Bacteria;Bacteroidetes;Flavobacteria;Flavobacteriales;Flavobacteriaceae;Tenacibaculum	0	0	4	0	0	0	0	0	0	0	0	0	0	0	0.00018851	0	0	0	0	0	0	0	0	0	0	1	0	0	0	0	1
Bacteria;Chloroflexi;Chloroflexales;Chloroflexaceae;environmental samples	0	0	0	0	0	0	0	0	0	0	1	0	0	0	0	0	0	0	0	0	0	0	0.0001343	0	0	0	0	0	0	1	1
Bacteria;Cyanobacteria;environmental samples	0	0	0	0	0	0	0	0	0	0	2	0	0	0	0	0	0	0	0	0	0	0	0.000268601	0	0	0	0	0	0	1	1
Bacteria;Firmicutes	0	0	0	0	0	0	0	0	1	0	0	0	0	0	0	0	0	0	0	0	3.70412e-05	0	0	0	0	0	0	0	1	0	1
Bacteria;Firmicutes;Bacillales;Bacillaceae;Bacillus	0	0	0	0	11	0	0	0	0	0	0	0	0	0	0	0	0.000512797	0	0	0	0	0	0	0	0	0	1	0	0	0	1
Bacteria;Firmicutes;Bacillales;Bacillaceae;Geobacillus	0	0	0	0	2	0	0	0	0	0	0	0	0	0	0	0	9.32357e-05	0	0	0	0	0	0	0	0	0	1	0	0	0	1
Bacteria;Firmicutes;Bacillales;Listeriaceae;Listeria	0	0	0	0	0	0	1	0	0	0	0	0	0	0	0	0	0	0	4.65268e-05	0	0	0	0	0	0	0	0	1	0	0	1
Bacteria;Firmicutes;Bacillales;Paenibacillaceae;Cohnella	0	0	0	0	1	0	0	0	0	0	0	0	0	0	0	0	4.66179e-05	0	0	0	0	0	0	0	0	0	1	0	0	0	1
Bacteria;Firmicutes;Bacillales;Paenibacillaceae;environmental samples	0	0	0	0	2	0	0	0	0	0	0	0	0	0	0	0	9.32357e-05	0	0	0	0	0	0	0	0	0	1	0	0	0	1
Bacteria;Firmicutes;Clostridia;Clostridiales;Clostridiales Family XI. Incertae Sedis;Peptoniphilus	0	0	1	0	0	0	0	0	0	0	0	0	0	0	4.71276e-05	0	0	0	0	0	0	0	0	0	0	1	0	0	0	0	1
Bacteria;Firmicutes;Clostridia;Clostridiales;Eubacteriaceae;Anaerofustis	2	0	0	0	0	0	0	0	2	0	0	2	0.000645578	0	0	0	0	0	0	0	7.40823e-05	0	0	0.000297575	1	0	0	0	1	-1	1
Bacteria;Firmicutes;Clostridia;Clostridiales;Heliobacteriaceae	10	4	0	0	0	0	0	0	0	0	0	0	0.00322789	0.000473597	0	0	0	0	0	0	0	0	0	0	1	0	0	0	0	0	1
Bacteria;Firmicutes;Clostridia;Clostridiales;Lachnospiraceae;Moryella	0	0	1	0	0	0	0	0	0	0	0	0	0	0	4.71276e-05	0	0	0	0	0	0	0	0	0	0	1	0	0	0	0	1
Bacteria;Firmicutes;Clostridia;Clostridiales;Peptostreptococcaceae;Peptostreptococcus	0	0	12	0	0	0	0	0	0	0	0	0	0	0	0.000565531	0	0	0	0	0	0	0	0	0	0	1	0	0	0	0	1
Bacteria;Firmicutes;Clostridia;Clostridiales;Ruminococcaceae;Faecalibacterium	0	0	6	0	5	2	0	0	5	3	0	0	0	0	0.000282765	0	0.000233089	0.000252302	0	0	0.000185206	3.17303e-05	0	0	0	1	-1	0	1	0	1
Bacteria;Firmicutes;Clostridia;Clostridiales;Veillonellaceae;Selenomonas;environmental samples	0	0	0	0	0	0	0	0	1	3	0	0	0	0	0	0	0	0	0	0	3.70412e-05	3.17303e-05	0	0	0	0	0	0	1	0	1
Bacteria;Firmicutes;Clostridia;Thermoanaerobacterales;Thermoanaerobacteraceae;Thermoanaerobacter	0	0	1	0	0	0	0	0	0	0	0	0	0	0	4.71276e-05	0	0	0	0	0	0	0	0	0	0	1	0	0	0	0	1
Bacteria;Firmicutes;Clostridia;Thermoanaerobacterales;Thermodesulfobiaceae;Coprothermobacter;environmental samples	0	0	0	0	0	0	0	0	0	0	1	0	0	0	0	0	0	0	0	0	0	0	0.0001343	0	0	0	0	0	0	1	1
Bacteria;Firmicutes;Lactobacillales;Aerococcaceae;Abiotrophia;environmental samples	1	0	0	0	0	6	1	0	0	0	0	0	0.000322789	0	0	0	0	0.000756907	4.65268e-05	0	0	0	0	0	1	0	-1	1	0	0	1
Bacteria;Firmicutes;Lactobacillales;Carnobacteriaceae;Carnobacterium	1	0	0	0	0	0	0	0	0	0	0	0	0.000322789	0	0	0	0	0	0	0	0	0	0	0	1	0	0	0	0	0	1
Bacteria;Firmicutes;Lactobacillales;Enterococcaceae;Enterococcus	0	0	3	0	3	3	5	2	4	6	0	1	0	0	0.000141383	0	0.000139854	0.000378453	0.000232634	0.000104728	0.000148165	6.34605e-05	0	0.000148787	0	1	-1	1	1	-1	1
Bacteria;Firmicutes;Lactobacillales;Leuconostoc	0	0	0	0	0	0	0	0	0	0	1	0	0	0	0	0	0	0	0	0	0	0	0.0001343	0	0	0	0	0	0	1	1
Bacteria;Firmicutes;Lactobacillales;Streptococcaceae;Streptococcus	0	0	6	0	42	123	36	0	16	11	3	12	0	0	0.000282765	0	0.00195795	0.0155166	0.00167496	0	0.000592658	0.000116344	0.000402901	0.00178545	0	1	-1	1	1	-1	1
Bacteria;Fusobacteria;Fusobacteriales;Fusobacteriaceae;Streptobacillus	0	0	0	0	0	0	0	0	0	0	22	0	0	0	0	0	0	0	0	0	0	0	0.00295461	0	0	0	0	0	0	1	1
Bacteria;Fusobacteria;Fusobacteriales;Fusobacteriaceae;Streptobacillus;environmental samples	0	0	0	0	0	0	0	0	0	0	2	0	0	0	0	0	0	0	0	0	0	0	0.000268601	0	0	0	0	0	0	1	1
Bacteria;Nitrospirae;Nitrospirales;Nitrospiraceae;Leptospirillum	1	0	0	0	0	0	0	0	0	0	0	0	0.000322789	0	0	0	0	0	0	0	0	0	0	0	1	0	0	0	0	0	1
Bacteria;Proteobacteria;Alphaproteobacteria;Caulobacterales;Caulobacteraceae;Caulobacter;environmental samples	0	0	0	0	0	0	0	0	0	0	1	0	0	0	0	0	0	0	0	0	0	0	0.0001343	0	0	0	0	0	0	1	1
Bacteria;Proteobacteria;Alphaproteobacteria;Rickettsiales;Rickettsiaceae;Rickettsieae;Rickettsia	0	0	0	0	1	0	0	0	0	0	0	0	0	0	0	0	4.66179e-05	0	0	0	0	0	0	0	0	0	1	0	0	0	1
Bacteria;Proteobacteria;Alphaproteobacteria;Sphingomonadales;Sphingomonadaceae;Sphingomonas	0	0	0	0	0	0	1	0	0	0	0	0	0	0	0	0	0	0	4.65268e-05	0	0	0	0	0	0	0	0	1	0	0	1
Bacteria;Proteobacteria;Betaproteobacteria;Burkholderiales;Alcaligenaceae;Sutterella	1	0	0	0	0	0	0	0	0	0	0	0	0.000322789	0	0	0	0	0	0	0	0	0	0	0	1	0	0	0	0	0	1
Bacteria;Proteobacteria;Betaproteobacteria;Burkholderiales;Alcaligenaceae;Sutterella;environmental samples	1	0	0	0	0	0	0	0	0	0	0	0	0.000322789	0	0	0	0	0	0	0	0	0	0	0	1	0	0	0	0	0	1
Bacteria;Proteobacteria;Betaproteobacteria;Burkholderiales;Comamonadaceae;Acidovorax	0	0	0	0	0	0	1	0	1	10	2	0	0	0	0	0	0	0	4.65268e-05	0	3.70412e-05	0.000105768	0.000268601	0	0	0	0	1	-1	1	1
Bacteria;Proteobacteria;Betaproteobacteria;Burkholderiales;Comamonadaceae;Comamonas	2	0	0	0	0	0	0	0	0	0	0	0	0.000645578	0	0	0	0	0	0	0	0	0	0	0	1	0	0	0	0	0	1
Bacteria;Proteobacteria;Betaproteobacteria;environmental samples	13	0	0	0	0	2	6	0	0	128	17	0	0.00419626	0	0	0	0	0.000252302	0.000279161	0	0	0.00135382	0.00228311	0	1	0	-1	1	-1	1	1
Bacteria;Proteobacteria;Gammaproteobacteria;Acidithiobacillales;Acidithiobacillaceae;Acidithiobacillus	11	0	1	0	0	2	0	0	0	0	0	0	0.00355068	0	4.71276e-05	0	0	0.000252302	0	0	0	0	0	0	1	1	-1	0	0	0	1
Bacteria;Proteobacteria;Gammaproteobacteria;Enterobacteriales;Enterobacteriaceae;Brenneria	0	0	10	8	4	4	11	3	6	1	0	1	0	0	0.000471276	0.000316331	0.000186471	0.000504605	0.000511795	0.000157093	0.000222247	1.05768e-05	0	0.000148787	0	1	-1	1	1	-1	1
Bacteria;Proteobacteria;Gammaproteobacteria;Enterobacteriales;Enterobacteriaceae;Citrobacter;environmental samples	0	0	18	23	27	8	15	7	14	13	0	1	0	0	0.000848296	0.00090945	0.00125868	0.00100921	0.000697902	0.00036655	0.000518576	0.000137498	0	0.000148787	0	-1	1	1	1	-1	1
Bacteria;Proteobacteria;Gammaproteobacteria;Enterobacteriales;Enterobacteriaceae;Erwinia	0	0	12	14	7	4	17	12	8	7	2	3	0	0	0.000565531	0.000553578	0.000326325	0.000504605	0.000790955	0.000628371	0.000296329	7.40373e-05	0.000268601	0.000446362	0	1	-1	1	1	-1	1
Bacteria;Proteobacteria;Gammaproteobacteria;Enterobacteriales;Enterobacteriaceae;Morganella	0	0	1	0	0	0	0	0	0	0	0	0	0	0	4.71276e-05	0	0	0	0	0	0	0	0	0	0	1	0	0	0	0	1
Bacteria;Proteobacteria;Gammaproteobacteria;Enterobacteriales;Enterobacteriaceae;Photorhabdus	0	0	6	7	2	1	4	2	3	5	0	1	0	0	0.000282765	0.000276789	9.32357e-05	0.000126151	0.000186107	0.000104728	0.000111123	5.28838e-05	0	0.000148787	0	1	-1	1	1	-1	1
Bacteria;Proteobacteria;Gammaproteobacteria;Enterobacteriales;Enterobacteriaceae;Salmonella;Salmonella enterica subsp. enterica serovar Typhimurium	0	0	12	18	13	4	24	9	19	14	2	5	0	0	0.000565531	0.000711744	0.000606032	0.000504605	0.00111664	0.000471278	0.000703782	0.000148075	0.000268601	0.000743937	0	-1	1	1	1	-1	1
Bacteria;Proteobacteria;Gammaproteobacteria;Enterobacteriales;Enterobacteriaceae;Shigella;environmental samples	0	0	59	62	31	14	63	21	35	38	0	21	0	0	0.00278053	0.00245156	0.00144515	0.00176612	0.00293119	0.00109965	0.00129644	0.000401917	0	0.00312454	0	1	-1	1	1	-1	1
Bacteria;Proteobacteria;Gammaproteobacteria;Enterobacteriales;Enterobacteriaceae;aphid secondary symbionts;Candidatus Regiella	0	0	5	3	2	0	2	4	6	1	0	1	0	0	0.000235638	0.000118624	9.32357e-05	0	9.30536e-05	0.000209457	0.000222247	1.05768e-05	0	0.000148787	0	1	1	-1	1	-1	1
Bacteria;Proteobacteria;Gammaproteobacteria;Legionellales;Legionellaceae;Fluoribacter	0	0	0	0	0	0	0	0	2	0	0	0	0	0	0	0	0	0	0	0	7.40823e-05	0	0	0	0	0	0	0	1	0	1
Bacteria;Proteobacteria;Gammaproteobacteria;Legionellales;Legionellaceae;Legionella	0	0	0	0	0	0	0	0	5	0	0	0	0	0	0	0	0	0	0	0	0.000185206	0	0	0	0	0	0	0	1	0	1
Bacteria;Proteobacteria;Gammaproteobacteria;Legionellales;Legionellaceae;Tatlockia	0	0	0	0	0	0	0	0	2	0	0	0	0	0	0	0	0	0	0	0	7.40823e-05	0	0	0	0	0	0	0	1	0	1
Bacteria;Proteobacteria;Gammaproteobacteria;Oceanospirillales;Halomonadaceae;Kushneria	0	0	2	4	2	2	5	4	4	1	1	0	0	0	9.42551e-05	0.000158165	9.32357e-05	0.000252302	0.000232634	0.000209457	0.000148165	1.05768e-05	0.0001343	0	0	-1	-1	1	1	1	1
Bacteria;Proteobacteria;Gammaproteobacteria;Pseudomonadales;Moraxellaceae;Moraxella	0	0	0	0	7	0	0	0	0	0	0	0	0	0	0	0	0.000326325	0	0	0	0	0	0	0	0	0	1	0	0	0	1
Bacteria;Proteobacteria;Gammaproteobacteria;Xanthomonadales;Xanthomonadaceae;Lysobacter	5	0	0	0	0	0	0	0	0	0	0	0	0.00161394	0	0	0	0	0	0	0	0	0	0	0	1	0	0	0	0	0	1
Bacteria;Proteobacteria;Gammaproteobacteria;Xanthomonadales;Xanthomonadaceae;Pseudoxanthomonas	3	0	0	0	0	0	0	0	0	0	0	0	0.000968367	0	0	0	0	0	0	0	0	0	0	0	1	0	0	0	0	0	1
Bacteria;Proteobacteria;Gammaproteobacteria;Xanthomonadales;Xanthomonadaceae;Stenotrophomonas	28	0	0	0	0	0	0	0	0	18	9	0	0.00903809	0	0	0	0	0	0	0	0	0.000190382	0.0012087	0	1	0	0	0	-1	1	1
Bacteria;Proteobacteria;Gammaproteobacteria;Xanthomonadales;Xanthomonadaceae;Stenotrophomonas;environmental samples	2	0	0	0	0	0	0	0	0	0	0	0	0.000645578	0	0	0	0	0	0	0	0	0	0	0	1	0	0	0	0	0	1
Bacteria;Proteobacteria;Gammaproteobacteria;Xanthomonadales;Xanthomonadaceae;Xanthomonas	12	0	0	0	0	0	0	0	0	7	5	0	0.00387347	0	0	0	0	0	0	0	0	7.40373e-05	0.000671501	0	1	0	0	0	-1	1	1
Bacteria;Proteobacteria;Gammaproteobacteria;Xanthomonadales;Xanthomonadaceae;environmental samples	1	0	0	0	0	0	0	0	0	0	0	0	0.000322789	0	0	0	0	0	0	0	0	0	0	0	1	0	0	0	0	0	1
Bacteria;candidate division NKB19;environmental samples	0	0	0	0	1	0	0	0	0	0	0	0	0	0	0	0	4.66179e-05	0	0	0	0	0	0	0	0	0	1	0	0	0	1
Eukaryota;Viridiplantae;Streptophyta;Embryophyta;Tracheophyta;Spermatophyta;Coniferopsida;Coniferales;Araucariaceae;Agathis	0	0	0	0	2	0	0	0	0	0	0	0	0	0	0	0	9.32357e-05	0	0	0	0	0	0	0	0	0	1	0	0	0	1
Eukaryota;Viridiplantae;Streptophyta;Embryophyta;Tracheophyta;Spermatophyta;Coniferopsida;Coniferales;Araucariaceae;Araucaria	0	0	0	0	5	0	0	0	0	0	0	0	0	0	0	0	0.000233089	0	0	0	0	0	0	0	0	0	1	0	0	0	1
Eukaryota;Viridiplantae;Streptophyta;Embryophyta;Tracheophyta;Spermatophyta;Cycadophyta;Cycadales;Zamiaceae;Zamia	0	0	0	0	5	0	0	0	0	0	0	0	0	0	0	0	0.000233089	0	0	0	0	0	0	0	0	0	1	0	0	0	1
Eukaryota;Viridiplantae;Streptophyta;Embryophyta;Tracheophyta;Spermatophyta;Magnoliophyta;Ceratophyllales;Ceratophyllaceae;Ceratophyllum	0	0	0	0	4	0	0	0	0	0	0	0	0	0	0	0	0.000186471	0	0	0	0	0	0	0	0	0	1	0	0	0	1
Eukaryota;Viridiplantae;Streptophyta;Embryophyta;Tracheophyta;Spermatophyta;Magnoliophyta;Liliopsida;Acoraceae;Acorus	0	0	0	0	7	0	0	0	0	0	0	0	0	0	0	0	0.000326325	0	0	0	0	0	0	0	0	0	1	0	0	0	1
Eukaryota;Viridiplantae;Streptophyta;Embryophyta;Tracheophyta;Spermatophyta;Magnoliophyta;Liliopsida;Poales;Bromeliaceae;Ananas	0	0	0	0	3	0	0	0	0	0	0	0	0	0	0	0	0.000139854	0	0	0	0	0	0	0	0	0	1	0	0	0	1
Eukaryota;Viridiplantae;Streptophyta;Embryophyta;Tracheophyta;Spermatophyta;Magnoliophyta;Liliopsida;Poales;Poaceae;BEP clade;Bambusoideae;Bambuseae;Bambusa	0	0	0	0	3	0	0	0	0	0	0	0	0	0	0	0	0.000139854	0	0	0	0	0	0	0	0	0	1	0	0	0	1
Eukaryota;Viridiplantae;Streptophyta;Embryophyta;Tracheophyta;Spermatophyta;Magnoliophyta;Liliopsida;Poales;Poaceae;BEP clade;Ehrhartoideae;Oryzeae;Oryza	0	0	0	0	9	0	0	0	0	0	0	0	0	0	0	0	0.000419561	0	0	0	0	0	0	0	0	0	1	0	0	0	1
Eukaryota;Viridiplantae;Streptophyta;Embryophyta;Tracheophyta;Spermatophyta;Magnoliophyta;Liliopsida;Poales;Poaceae;BEP clade;Pooideae;Triticeae;Triticum	0	0	0	0	6	0	0	0	0	0	0	0	0	0	0	0	0.000279707	0	0	0	0	0	0	0	0	0	1	0	0	0	1
Eukaryota;Viridiplantae;Streptophyta;Embryophyta;Tracheophyta;Spermatophyta;Magnoliophyta;Liliopsida;Poales;Poaceae;PACCAD clade;Panicoideae;Andropogoneae;Sorghum	0	0	0	0	3	0	0	0	0	0	0	0	0	0	0	0	0.000139854	0	0	0	0	0	0	0	0	0	1	0	0	0	1
Eukaryota;Viridiplantae;Streptophyta;Embryophyta;Tracheophyta;Spermatophyta;Magnoliophyta;Liliopsida;Poales;Poaceae;PACCAD clade;Panicoideae;Andropogoneae;Tripsacum	0	0	0	0	3	0	0	0	0	0	0	0	0	0	0	0	0.000139854	0	0	0	0	0	0	0	0	0	1	0	0	0	1
Eukaryota;Viridiplantae;Streptophyta;Embryophyta;Tracheophyta;Spermatophyta;Magnoliophyta;Liliopsida;Poales;Poaceae;PACCAD clade;Panicoideae;Andropogoneae;Zea	0	0	0	0	3	0	0	0	0	0	0	0	0	0	0	0	0.000139854	0	0	0	0	0	0	0	0	0	1	0	0	0	1
Eukaryota;Viridiplantae;Streptophyta;Embryophyta;Tracheophyta;Spermatophyta;Magnoliophyta;Liliopsida;Stemonaceae;Croomia	0	0	0	0	5	0	0	0	0	0	0	0	0	0	0	0	0.000233089	0	0	0	0	0	0	0	0	0	1	0	0	0	1
Eukaryota;Viridiplantae;Streptophyta;Embryophyta;Tracheophyta;Spermatophyta;Magnoliophyta;Liliopsida;Tofieldiaceae;Tofieldia	0	0	0	0	4	0	0	0	0	0	0	0	0	0	0	0	0.000186471	0	0	0	0	0	0	0	0	0	1	0	0	0	1
Eukaryota;Viridiplantae;Streptophyta;Embryophyta;Tracheophyta;Spermatophyta;Magnoliophyta;basal Magnoliophyta;Amborellales;Amborellaceae;Amborella	0	0	0	0	5	0	0	0	0	0	0	0	0	0	0	0	0.000233089	0	0	0	0	0	0	0	0	0	1	0	0	0	1
Eukaryota;Viridiplantae;Streptophyta;Embryophyta;Tracheophyta;Spermatophyta;Magnoliophyta;basal Magnoliophyta;Austrobaileyales;Austrobaileyaceae;Austrobaileya	0	0	0	0	1	0	0	0	0	0	0	0	0	0	0	0	4.66179e-05	0	0	0	0	0	0	0	0	0	1	0	0	0	1
Eukaryota;Viridiplantae;Streptophyta;Embryophyta;Tracheophyta;Spermatophyta;Magnoliophyta;basal Magnoliophyta;Austrobaileyales;Schisandraceae;Illicium	0	0	0	0	2	0	0	0	0	0	0	0	0	0	0	0	9.32357e-05	0	0	0	0	0	0	0	0	0	1	0	0	0	1
Eukaryota;Viridiplantae;Streptophyta;Embryophyta;Tracheophyta;Spermatophyta;Magnoliophyta;basal Magnoliophyta;Austrobaileyales;Schisandraceae;Schisandra	0	0	0	0	4	0	0	0	0	0	0	0	0	0	0	0	0.000186471	0	0	0	0	0	0	0	0	0	1	0	0	0	1
Eukaryota;Viridiplantae;Streptophyta;Embryophyta;Tracheophyta;Spermatophyta;Magnoliophyta;basal Magnoliophyta;Nymphaeales;Nymphaeaceae;Euryale	0	0	0	0	5	0	0	0	0	0	0	0	0	0	0	0	0.000233089	0	0	0	0	0	0	0	0	0	1	0	0	0	1
Eukaryota;Viridiplantae;Streptophyta;Embryophyta;Tracheophyta;Spermatophyta;Magnoliophyta;eudicotyledons;Buxales;Didymelaceae;Didymeles	0	0	0	0	5	0	0	0	0	0	0	0	0	0	0	0	0.000233089	0	0	0	0	0	0	0	0	0	1	0	0	0	1
Eukaryota;Viridiplantae;Streptophyta;Embryophyta;Tracheophyta;Spermatophyta;Magnoliophyta;eudicotyledons;Proteales;Proteaceae;Petrophile	0	0	0	0	2	0	0	0	0	0	0	0	0	0	0	0	9.32357e-05	0	0	0	0	0	0	0	0	0	1	0	0	0	1
Eukaryota;Viridiplantae;Streptophyta;Embryophyta;Tracheophyta;Spermatophyta;Magnoliophyta;eudicotyledons;Ranunculales;Lardizabalaceae;Sargentodoxa	0	0	0	0	5	0	0	0	0	0	0	0	0	0	0	0	0.000233089	0	0	0	0	0	0	0	0	0	1	0	0	0	1
Eukaryota;Viridiplantae;Streptophyta;Embryophyta;Tracheophyta;Spermatophyta;Magnoliophyta;eudicotyledons;Ranunculales;Menispermaceae;Cissampelos	0	0	0	0	2	0	0	0	0	0	0	0	0	0	0	0	9.32357e-05	0	0	0	0	0	0	0	0	0	1	0	0	0	1
Eukaryota;Viridiplantae;Streptophyta;Embryophyta;Tracheophyta;Spermatophyta;Magnoliophyta;eudicotyledons;Ranunculales;Ranunculaceae;Clematis	0	0	0	0	1	0	0	0	0	0	0	0	0	0	0	0	4.66179e-05	0	0	0	0	0	0	0	0	0	1	0	0	0	1
Eukaryota;Viridiplantae;Streptophyta;Embryophyta;Tracheophyta;Spermatophyta;Magnoliophyta;eudicotyledons;Ranunculales;Ranunculaceae;Xanthorhiza	0	0	0	0	1	0	0	0	0	0	0	0	0	0	0	0	4.66179e-05	0	0	0	0	0	0	0	0	0	1	0	0	0	1
Eukaryota;Viridiplantae;Streptophyta;Embryophyta;Tracheophyta;Spermatophyta;Magnoliophyta;eudicotyledons;core eudicotyledons;Caryophyllales;Caryophyllaceae;Silene	0	0	0	0	4	0	0	0	0	0	0	0	0	0	0	0	0.000186471	0	0	0	0	0	0	0	0	0	1	0	0	0	1
Eukaryota;Viridiplantae;Streptophyta;Embryophyta;Tracheophyta;Spermatophyta;Magnoliophyta;eudicotyledons;core eudicotyledons;asterids;lamiids;Solanales;Solanaceae;Nicotianoideae;Nicotianeae;Nicotiana	0	0	0	0	4	0	0	0	0	0	0	0	0	0	0	0	0.000186471	0	0	0	0	0	0	0	0	0	1	0	0	0	1
Eukaryota;Viridiplantae;Streptophyta;Embryophyta;Tracheophyta;Spermatophyta;Magnoliophyta;eudicotyledons;core eudicotyledons;rosids;eurosids I;Cucurbitales;Cucurbitaceae;Cucumis	0	0	0	0	14	0	0	0	0	0	0	0	0	0	0	0	0.00065265	0	0	0	0	0	0	0	0	0	1	0	0	0	1
Eukaryota;Viridiplantae;Streptophyta;Embryophyta;Tracheophyta;Spermatophyta;Magnoliophyta;eudicotyledons;core eudicotyledons;rosids;eurosids I;Fabales;Fabaceae;Papilionoideae;Genisteae;Lupinus	0	0	0	0	5	0	0	0	0	0	0	0	0	0	0	0	0.000233089	0	0	0	0	0	0	0	0	0	1	0	0	0	1
Eukaryota;Viridiplantae;Streptophyta;Embryophyta;Tracheophyta;Spermatophyta;Magnoliophyta;eudicotyledons;core eudicotyledons;rosids;eurosids I;Fabales;Fabaceae;Papilionoideae;Phaseoleae;Glycine	0	0	0	0	4	0	0	0	0	0	0	0	0	0	0	0	0.000186471	0	0	0	0	0	0	0	0	0	1	0	0	0	1
Eukaryota;Viridiplantae;Streptophyta;Embryophyta;Tracheophyta;Spermatophyta;Magnoliophyta;eudicotyledons;core eudicotyledons;rosids;eurosids II;Brassicales;Brassicaceae;Brassica	0	0	0	0	4	0	0	0	0	0	0	0	0	0	0	0	0.000186471	0	0	0	0	0	0	0	0	0	1	0	0	0	1
Eukaryota;Viridiplantae;Streptophyta;Embryophyta;Tracheophyta;Spermatophyta;Magnoliophyta;eudicotyledons;core eudicotyledons;rosids;eurosids II;Brassicales;Caricaceae;Carica	0	0	0	0	5	0	0	0	0	0	0	0	0	0	0	0	0.000233089	0	0	0	0	0	0	0	0	0	1	0	0	0	1
Eukaryota;Viridiplantae;Streptophyta;Embryophyta;Tracheophyta;Spermatophyta;Magnoliophyta;magnoliids;Laurales;Atherospermataceae;Daphnandra	0	0	0	0	7	0	0	0	0	0	0	0	0	0	0	0	0.000326325	0	0	0	0	0	0	0	0	0	1	0	0	0	1
Eukaryota;Viridiplantae;Streptophyta;Embryophyta;Tracheophyta;Spermatophyta;Magnoliophyta;magnoliids;Laurales;Calycanthaceae;Idiospermoideae;Idiospermum	0	0	0	0	2	0	0	0	0	0	0	0	0	0	0	0	9.32357e-05	0	0	0	0	0	0	0	0	0	1	0	0	0	1
Eukaryota;Viridiplantae;Streptophyta;Embryophyta;Tracheophyta;Spermatophyta;Magnoliophyta;magnoliids;Laurales;Siparunaceae;Siparuna	0	0	0	0	4	0	0	0	0	0	0	0	0	0	0	0	0.000186471	0	0	0	0	0	0	0	0	0	1	0	0	0	1
Eukaryota;Viridiplantae;Streptophyta;Embryophyta;Tracheophyta;Spermatophyta;Magnoliophyta;magnoliids;Magnoliales;Annonaceae;Cananga	0	0	0	0	1	0	0	0	0	0	0	0	0	0	0	0	4.66179e-05	0	0	0	0	0	0	0	0	0	1	0	0	0	1
Eukaryota;Viridiplantae;Streptophyta;Embryophyta;Tracheophyta;Spermatophyta;Magnoliophyta;magnoliids;Piperales;Saururaceae;Saururus	0	0	0	0	7	0	0	0	0	0	0	0	0	0	0	0	0.000326325	0	0	0	0	0	0	0	0	0	1	0	0	0	1
Eukaryota;mixed EST libraries	0	0	0	0	3	0	0	0	0	0	0	0	0	0	0	0	0.000139854	0	0	0	0	0	0	0	0	0	1	0	0	0	1
Bacteria	12	9	438	445	253	134	350	373	477	286	8	61	0.00387347	0.00106559	0.0206419	0.0175959	0.0117943	0.0169043	0.0162844	0.0195319	0.0176686	0.00302495	0.0010744	0.00907603	1	1	-1	-1	1	-1	0
Bacteria;Actinobacteria;Actinobacteridae;Actinomycetales;Corynebacterineae;Corynebacteriaceae;Corynebacterium	0	0	0	0	26	0	0	0	1	4	0	0	0	0	0	0	0.00121206	0	0	0	3.70412e-05	4.2307e-05	0	0	0	0	1	0	-1	0	0
Bacteria;Actinobacteria;Actinobacteridae;Actinomycetales;Propionibacterineae;Nocardioidaceae;Nocardioides	0	0	11	9	7	3	3	5	11	1	0	0	0	0	0.000518403	0.000355872	0.000326325	0.000378453	0.00013958	0.000261821	0.000407453	1.05768e-05	0	0	0	1	-1	-1	1	0	0
Bacteria;Bacteroidetes;Bacteroidia;Bacteroidales;Bacteroidaceae;environmental samples	1	6	0	0	0	0	0	0	0	0	1	0	0.000322789	0.000710395	0	0	0	0	0	0	0	0	0.0001343	0	-1	0	0	0	0	1	0
Bacteria;Firmicutes;Bacillales;Staphylococcus	0	0	0	0	27	4	0	0	0	3	0	0	0	0	0	0	0.00125868	0.000504605	0	0	0	3.17303e-05	0	0	0	0	1	0	-1	0	0
Bacteria;Firmicutes;Bacillales;Staphylococcus;environmental samples	0	0	0	0	7	1	0	0	0	1	0	0	0	0	0	0	0.000326325	0.000126151	0	0	0	1.05768e-05	0	0	0	0	1	0	-1	0	0
Bacteria;Firmicutes;Clostridia;Clostridiales;Clostridiales Family XI. Incertae Sedis;Sedimentibacter;environmental samples	1	0	0	0	0	0	0	0	0	1	0	0	0.000322789	0	0	0	0	0	0	0	0	1.05768e-05	0	0	1	0	0	0	-1	0	0
Bacteria;Firmicutes;Clostridia;Clostridiales;Clostridiales Family XIII. Incertae Sedis;Mogibacterium;environmental samples	0	0	1	0	0	38	0	0	0	0	0	0	0	0	4.71276e-05	0	0	0.00479374	0	0	0	0	0	0	0	1	-1	0	0	0	0
Bacteria;Firmicutes;Clostridia;Clostridiales;Eubacteriaceae;Eubacterium	2	0	0	0	0	0	0	0	0	1	0	0	0.000645578	0	0	0	0	0	0	0	0	1.05768e-05	0	0	1	0	0	0	-1	0	0
Bacteria;Firmicutes;Clostridia;Clostridiales;Ruminococcaceae;Anaerotruncus	0	2	0	0	0	0	0	0	0	0	4	0	0	0.000236798	0	0	0	0	0	0	0	0	0.000537201	0	-1	0	0	0	0	1	0
Bacteria;Firmicutes;Clostridia;Clostridiales;Veillonellaceae;Veillonella;environmental samples	0	0	0	0	0	1	0	0	0	0	11	0	0	0	0	0	0	0.000126151	0	0	0	0	0.0014773	0	0	0	-1	0	0	1	0
Bacteria;Firmicutes;Lactobacillales;Carnobacteriaceae;Granulicatella	7	0	0	0	0	43	5	0	0	7	0	0	0.00225952	0	0	0	0	0.0054245	0.000232634	0	0	7.40373e-05	0	0	1	0	-1	1	-1	0	0
Bacteria;Firmicutes;Lactobacillales;Streptococcaceae;Lactococcus;environmental samples	0	0	0	0	3	9	9	0	0	0	0	0	0	0	0	0	0.000139854	0.00113536	0.000418741	0	0	0	0	0	0	0	-1	1	0	0	0
Bacteria;Firmicutes;Lactobacillales;Streptococcaceae;Streptococcus;environmental samples	0	1	19	0	74	231	25	12	63	51	23	43	0	0.000118399	0.000895424	0	0.00344972	0.0291409	0.00116317	0.000628371	0.00233359	0.000539414	0.00308891	0.00639786	-1	1	-1	1	1	-1	0
Bacteria;Firmicutes;environmental samples	28	11	2	5	37	62	9	3	45	17	5	31	0.00903809	0.00130239	9.42551e-05	0.000197707	0.00172486	0.00782137	0.000418741	0.000157093	0.00166685	0.000179805	0.000671501	0.00461241	1	-1	-1	1	1	-1	0
Bacteria;Proteobacteria;Alphaproteobacteria;Caulobacterales;Caulobacteraceae;environmental samples	0	0	0	0	0	0	0	0	0	370	9	0	0	0	0	0	0	0	0	0	0	0.0039134	0.0012087	0	0	0	0	0	-1	1	0
Bacteria;Proteobacteria;Alphaproteobacteria;Caulobacterales;environmental samples	0	0	0	0	0	0	0	0	0	380	9	0	0	0	0	0	0	0	0	0	0	0.00401917	0.0012087	0	0	0	0	0	-1	1	0
Bacteria;Proteobacteria;Alphaproteobacteria;Rhizobiales;Bradyrhizobiaceae;environmental samples	0	0	0	0	0	0	0	0	0	382	9	0	0	0	0	0	0	0	0	0	0	0.00404032	0.0012087	0	0	0	0	0	-1	1	0
Bacteria;Proteobacteria;Alphaproteobacteria;Rhizobiales;Brucellaceae;Ochrobactrum	0	0	0	0	0	0	0	0	0	911	20	0	0	0	0	0	0	0	0	0	0	0.00963542	0.00268601	0	0	0	0	0	-1	1	0
Bacteria;Proteobacteria;Alphaproteobacteria;Rhizobiales;Brucellaceae;Ochrobactrum;environmental samples	0	0	0	0	0	0	0	0	0	28	1	0	0	0	0	0	0	0	0	0	0	0.000296149	0.0001343	0	0	0	0	0	-1	1	0
Bacteria;Proteobacteria;Alphaproteobacteria;Rhizobiales;Hyphomicrobiaceae;Blastochloris;environmental samples	0	0	0	0	0	0	0	0	0	740	20	0	0	0	0	0	0	0	0	0	0	0.0078268	0.00268601	0	0	0	0	0	-1	1	0
Bacteria;Proteobacteria;Alphaproteobacteria;Rhizobiales;Hyphomicrobiaceae;Rhodoplanes;environmental samples	0	0	0	0	0	0	0	0	0	373	9	0	0	0	0	0	0	0	0	0	0	0.00394513	0.0012087	0	0	0	0	0	-1	1	0
Bacteria;Proteobacteria;Alphaproteobacteria;Rhizobiales;Hyphomicrobiaceae;environmental samples	0	0	0	0	0	0	0	0	0	14087	342	0	0	0	0	0	0	0	0	0	0	0.148995	0.0459307	0	0	0	0	0	-1	1	0
Bacteria;Proteobacteria;Alphaproteobacteria;Rhizobiales;Methylobacteriaceae;Meganema;environmental samples	0	0	0	0	0	0	0	0	0	8	1	0	0	0	0	0	0	0	0	0	0	8.4614e-05	0.0001343	0	0	0	0	0	-1	1	0
Bacteria;Proteobacteria;Alphaproteobacteria;Rhizobiales;Phyllobacteriaceae;Defluvibacter	0	0	0	0	0	0	0	0	0	7	1	0	0	0	0	0	0	0	0	0	0	7.40373e-05	0.0001343	0	0	0	0	0	-1	1	0
Bacteria;Proteobacteria;Alphaproteobacteria;Rhizobiales;Phyllobacteriaceae;Mesorhizobium	0	0	0	0	0	0	0	0	0	322	1	0	0	0	0	0	0	0	0	0	0	0.00340571	0.0001343	0	0	0	0	0	-1	1	0
Bacteria;Proteobacteria;Alphaproteobacteria;Rhizobiales;Phyllobacteriaceae;Mesorhizobium;environmental samples	0	0	0	0	0	0	0	0	0	35	1	0	0	0	0	0	0	0	0	0	0	0.000370186	0.0001343	0	0	0	0	0	-1	1	0
Bacteria;Proteobacteria;Alphaproteobacteria;Rhizobiales;Phyllobacteriaceae;Phyllobacterium	0	0	0	0	0	0	0	0	0	107	1	0	0	0	0	0	0	0	0	0	0	0.00113171	0.0001343	0	0	0	0	0	-1	1	0
Bacteria;Proteobacteria;Alphaproteobacteria;Rhizobiales;Phyllobacteriaceae;Pseudaminobacter;environmental samples	0	0	0	0	0	0	0	0	0	23	4	0	0	0	0	0	0	0	0	0	0	0.000243265	0.000537201	0	0	0	0	0	-1	1	0
Bacteria;Proteobacteria;Alphaproteobacteria;Rhizobiales;Phyllobacteriaceae;environmental samples	0	0	0	0	0	0	0	0	0	392	9	0	0	0	0	0	0	0	0	0	0	0.00414609	0.0012087	0	0	0	0	0	-1	1	0
Bacteria;Proteobacteria;Alphaproteobacteria;Rhizobiales;Rhizobiaceae;Rhizobium/Agrobacterium group;Agrobacterium	0	0	0	0	0	0	0	0	0	139	1	0	0	0	0	0	0	0	0	0	0	0.00147017	0.0001343	0	0	0	0	0	-1	1	0
Bacteria;Proteobacteria;Alphaproteobacteria;Rhizobiales;Rhizobiaceae;Rhizobium/Agrobacterium group;Rhizobium	0	0	0	0	0	0	0	0	0	1735	15	0	0	0	0	0	0	0	0	0	0	0.0183507	0.0020145	0	0	0	0	0	-1	1	0
Bacteria;Proteobacteria;Alphaproteobacteria;Rhizobiales;Rhizobiaceae;Rhizobium/Agrobacterium group;Rhizobium;environmental samples	0	0	0	0	0	0	0	0	0	48	3	0	0	0	0	0	0	0	0	0	0	0.000507684	0.000402901	0	0	0	0	0	-1	1	0
Bacteria;Proteobacteria;Alphaproteobacteria;Rhizobiales;Rhizobiaceae;Sinorhizobium/Ensifer group;Ensifer	0	0	0	0	0	0	0	0	0	85	2	0	0	0	0	0	0	0	0	0	0	0.000899024	0.000268601	0	0	0	0	0	-1	1	0
Bacteria;Proteobacteria;Alphaproteobacteria;Rhizobiales;Rhizobiaceae;Sinorhizobium/Ensifer group;Ensifer;environmental samples	0	0	0	0	0	0	0	0	0	377	9	0	0	0	0	0	0	0	0	0	0	0.00398743	0.0012087	0	0	0	0	0	-1	1	0
Bacteria;Proteobacteria;Alphaproteobacteria;Rhizobiales;Rhizobiaceae;Sinorhizobium/Ensifer group;Sinorhizobium	0	0	0	0	0	0	0	0	0	474	3	0	0	0	0	0	0	0	0	0	0	0.00501338	0.000402901	0	0	0	0	0	-1	1	0
Bacteria;Proteobacteria;Alphaproteobacteria;Rhizobiales;Rhizobiaceae;environmental samples	0	0	0	0	0	0	0	0	0	743	18	0	0	0	0	0	0	0	0	0	0	0.00785853	0.00241741	0	0	0	0	0	-1	1	0
Bacteria;Proteobacteria;Alphaproteobacteria;Rhizobiales;Xanthobacteraceae;environmental samples	0	0	0	0	0	0	0	0	0	379	9	0	0	0	0	0	0	0	0	0	0	0.00400859	0.0012087	0	0	0	0	0	-1	1	0
Bacteria;Proteobacteria;Alphaproteobacteria;Rhizobiales;environmental samples	0	0	0	0	0	0	0	0	0	1871	45	0	0	0	0	0	0	0	0	0	0	0.0197891	0.00604351	0	0	0	0	0	-1	1	0
Bacteria;Proteobacteria;Alphaproteobacteria;Rhodobacterales;Rhodobacteraceae;Pannonibacter;environmental samples	0	0	0	0	0	0	0	0	0	371	10	0	0	0	0	0	0	0	0	0	0	0.00392397	0.001343	0	0	0	0	0	-1	1	0
Bacteria;Proteobacteria;Betaproteobacteria;Nitrosomonadales;Nitrosomonadaceae;Nitrosovibrio;environmental samples	0	0	0	0	0	0	0	0	0	370	9	0	0	0	0	0	0	0	0	0	0	0.0039134	0.0012087	0	0	0	0	0	-1	1	0
Bacteria;Proteobacteria;Betaproteobacteria;Rhodocyclales;Rhodocyclaceae;environmental samples	0	0	0	0	0	0	0	0	0	371	9	0	0	0	0	0	0	0	0	0	0	0.00392397	0.0012087	0	0	0	0	0	-1	1	0
Bacteria;Proteobacteria;Deltaproteobacteria;environmental samples	0	0	0	0	0	0	0	0	1	4	1	0	0	0	0	0	0	0	0	0	3.70412e-05	4.2307e-05	0.0001343	0	0	0	0	0	-1	1	0
Bacteria;Proteobacteria;Gammaproteobacteria	1	0	13	31	23	8	55	51	87	10	0	7	0.000322789	0	0.000612658	0.00122578	0.00107221	0.00100921	0.00255897	0.00267058	0.00322258	0.000105768	0	0.00104151	1	-1	1	-1	1	-1	0
Bacteria;Proteobacteria;Gammaproteobacteria;Enterobacteriales;Enterobacteriaceae;Enterobacter;environmental samples	46	16	1307	1928	1526	458	1457	1478	1922	919	62	368	0.0148483	0.00189439	0.0615957	0.0762357	0.0711389	0.0577772	0.0677895	0.0773944	0.0711931	0.00972003	0.00832662	0.0547538	1	-1	1	-1	1	-1	0
Bacteria;Proteobacteria;Gammaproteobacteria;Enterobacteriales;Enterobacteriaceae;Escherichia;environmental samples	1	4	248	268	184	51	179	197	273	103	1	50	0.000322789	0.000473597	0.0116876	0.0105971	0.00857769	0.00643371	0.00832829	0.0103158	0.0101122	0.00108941	0.0001343	0.00743937	-1	1	1	-1	1	-1	0
Bacteria;Proteobacteria;Gammaproteobacteria;Enterobacteriales;Enterobacteriaceae;Hafnia	1	2	0	12	10	1	11	0	0	4	4	40	0.000322789	0.000236798	0	0.000474496	0.000466179	0.000126151	0.000511795	0	0	4.2307e-05	0.000537201	0.0059515	1	-1	1	1	-1	-1	0
Bacteria;Proteobacteria;Gammaproteobacteria;Enterobacteriales;Enterobacteriaceae;Pantoea	5	6	811	775	668	261	390	667	786	376	6	103	0.00161394	0.000710395	0.0382205	0.0306445	0.0311407	0.0329254	0.0181454	0.034927	0.0291143	0.00397686	0.000805802	0.0153251	1	1	-1	-1	1	-1	0
Bacteria;Proteobacteria;Gammaproteobacteria;Enterobacteriales;Enterobacteriaceae;Phytobacter	0	0	0	3	2	0	0	0	2	3	0	4	0	0	0	0.000118624	9.32357e-05	0	0	0	7.40823e-05	3.17303e-05	0	0.00059515	0	-1	1	0	1	-1	0
Bacteria;Proteobacteria;Gammaproteobacteria;Enterobacteriales;Enterobacteriaceae;Raoultella	0	0	2	4	2	2	6	3	3	1	0	0	0	0	9.42551e-05	0.000158165	9.32357e-05	0.000252302	0.000279161	0.000157093	0.000111123	1.05768e-05	0	0	0	-1	-1	1	1	0	0
Bacteria;Proteobacteria;Gammaproteobacteria;Enterobacteriales;Enterobacteriaceae;Salmonella	16	7	607	943	586	228	959	538	758	372	16	124	0.00516462	0.000828795	0.0286064	0.0372875	0.0273181	0.0287625	0.0446192	0.028172	0.0280772	0.00393455	0.0021488	0.0184496	1	-1	-1	1	1	-1	0
Bacteria;Proteobacteria;Gammaproteobacteria;Enterobacteriales;Enterobacteriaceae;Salmonella;environmental samples	0	0	14	11	12	8	2	8	10	10	0	0	0	0	0.000659786	0.000434955	0.000559414	0.00100921	9.30536e-05	0.000418914	0.000370412	0.000105768	0	0	0	1	-1	-1	1	0	0
Bacteria;Proteobacteria;Gammaproteobacteria;Enterobacteriales;Enterobacteriaceae;Xenorhabdus	0	0	1	1	0	0	4	0	2	11	0	1	0	0	4.71276e-05	3.95413e-05	0	0	0.000186107	0	7.40823e-05	0.000116344	0	0.000148787	0	1	0	1	-1	-1	0
Bacteria;Proteobacteria;Gammaproteobacteria;Enterobacteriales;Enterobacteriaceae;environmental samples	1	0	6	10	7	4	10	2	5	6	0	18	0.000322789	0	0.000282765	0.000395413	0.000326325	0.000504605	0.000465268	0.000104728	0.000185206	6.34605e-05	0	0.00267817	1	-1	-1	1	1	-1	0
Bacteria;Proteobacteria;Gammaproteobacteria;Pasteurellales;Pasteurellaceae	0	0	0	0	0	0	0	0	0	42	1	0	0	0	0	0	0	0	0	0	0	0.000444224	0.0001343	0	0	0	0	0	-1	1	0
Bacteria;Proteobacteria;Gammaproteobacteria;Pasteurellales;Pasteurellaceae;Haemophilus	0	0	1	0	0	0	0	0	0	9	0	0	0	0	4.71276e-05	0	0	0	0	0	0	9.51908e-05	0	0	0	1	0	0	-1	0	0
Bacteria;Proteobacteria;Gammaproteobacteria;Pasteurellales;Pasteurellaceae;Haemophilus;environmental samples	0	0	0	0	0	0	0	0	0	46	2	0	0	0	0	0	0	0	0	0	0	0.000486531	0.000268601	0	0	0	0	0	-1	1	0
Bacteria;Proteobacteria;Gammaproteobacteria;Pseudomonadales;Pseudomonadaceae;Pseudomonas;environmental samples	0	0	0	0	0	0	0	0	0	7	1	0	0	0	0	0	0	0	0	0	0	7.40373e-05	0.0001343	0	0	0	0	0	-1	1	0
Bacteria;Proteobacteria;Gammaproteobacteria;Vibrionales;Vibrionaceae;Photobacterium;environmental samples	0	0	0	0	0	0	0	1	2	0	0	0	0	0	0	0	0	0	0	5.23642e-05	7.40823e-05	0	0	0	0	0	0	-1	1	0	0
Bacteria;Proteobacteria;Gammaproteobacteria;Vibrionales;Vibrionaceae;Vibrio	0	0	5	0	3	3	0	4	1	0	0	0	0	0	0.000235638	0	0.000139854	0.000378453	0	0.000209457	3.70412e-05	0	0	0	0	1	-1	-1	1	0	0
Bacteria;Proteobacteria;Gammaproteobacteria;Xanthomonadales;Xanthomonadaceae;Lysobacter;environmental samples	8	0	0	0	0	0	0	0	0	3	0	0	0.00258231	0	0	0	0	0	0	0	0	3.17303e-05	0	0	1	0	0	0	-1	0	0
Bacteria;Proteobacteria;Gammaproteobacteria;environmental samples	12	3	451	370	319	119	266	245	401	247	3	58	0.00387347	0.000355198	0.0212545	0.0146303	0.0148711	0.015012	0.0123761	0.0128292	0.0148535	0.00261246	0.000402901	0.00862967	1	1	-1	-1	1	-1	0
Bacteria;Proteobacteria;environmental samples	12	22	937	1560	1090	225	944	698	1205	10389	247	359	0.00387347	0.00260478	0.0441585	0.0616845	0.0508135	0.028384	0.0439213	0.0365502	0.0446346	0.109882	0.0331722	0.0534147	1	-1	1	1	-1	-1	0
Bacteria;Verrucomicrobia;environmental samples	0	0	0	0	0	0	0	0	0	374	9	0	0	0	0	0	0	0	0	0	0	0.0039557	0.0012087	0	0	0	0	0	-1	1	0
Bacteria;environmental samples	2624	7786	12292	15940	13071	4540	13511	12745	17828	43221	6014	4657	0.846998	0.921857	0.579292	0.630289	0.609342	0.572726	0.628623	0.667382	0.66037	0.457138	0.807682	0.692903	-1	-1	1	-1	1	1	0
Eukaryota;Metazoa;Arthropoda;Hexapoda;Insecta;Pterygota;Neoptera;Endopterygota;Diptera;Nematocera;Culicoidea;Culicidae;Culicinae;Culicini;Culex;Culex	0	0	12	1	1	2	1	7	6	1	0	0	0	0	0.000565531	3.95413e-05	4.66179e-05	0.000252302	4.65268e-05	0.00036655	0.000222247	1.05768e-05	0	0	0	1	-1	-1	1	0	0
unclassified sequences	1	0	30	29	31	24	25	24	30	397	10	8	0.000322789	0	0.00141383	0.0011467	0.00144515	0.00302763	0.00116317	0.00125674	0.00111123	0.00419897	0.001343	0.0011903	1	1	-1	-1	-1	1	0
unclassified sequences;environmental samples	0	1	15	19	161	5	14	24	32	41	3	2	0	0.000118399	0.000706914	0.000751285	0.00750548	0.000630756	0.000651375	0.00125674	0.00118532	0.000433647	0.000402901	0.000297575	-1	-1	1	-1	1	1	0
unclassified sequences;metagenomes;organismal metagenomes	1	1	13	24	12	9	14	11	15	13	3	7	0.000322789	0.000118399	0.000612658	0.000948992	0.000559414	0.00113536	0.000651375	0.000576007	0.000555617	0.000137498	0.000402901	0.00104151	1	-1	-1	1	1	-1	0
Bacteria;Actinobacteria;Actinobacteridae;Actinomycetales;Corynebacterineae;Mycobacteriaceae;environmental samples	0	0	0	0	0	0	0	0	0	2	0	0	0	0	0	0	0	0	0	0	0	2.11535e-05	0	0	0	0	0	0	-1	0	-1
Bacteria;Actinobacteria;Actinobacteridae;Actinomycetales;Corynebacterineae;Nocardiaceae;Rhodococcus	0	0	0	0	0	2	0	0	0	0	0	0	0	0	0	0	0	0.000252302	0	0	0	0	0	0	0	0	-1	0	0	0	-1
Bacteria;Actinobacteria;Coriobacteridae;Coriobacteriales;Coriobacterineae;Coriobacteriaceae;Atopobium	0	1	0	0	0	0	0	0	0	0	0	0	0	0.000118399	0	0	0	0	0	0	0	0	0	0	-1	0	0	0	0	0	-1
Bacteria;Actinobacteria;Coriobacteridae;Coriobacteriales;Coriobacterineae;Coriobacteriaceae;Atopobium;environmental samples	0	2	0	0	0	0	0	0	0	0	0	0	0	0.000236798	0	0	0	0	0	0	0	0	0	0	-1	0	0	0	0	0	-1
Bacteria;Actinobacteria;Coriobacteridae;Coriobacteriales;Coriobacterineae;Coriobacteriaceae;Eggerthella	0	1	0	0	0	0	0	0	0	0	0	0	0	0.000118399	0	0	0	0	0	0	0	0	0	0	-1	0	0	0	0	0	-1
Bacteria;Bacteroidetes;Bacteroidia;Bacteroidales;Bacteroidaceae;Bacteroides	0	2	1	0	0	0	0	0	0	2	0	0	0	0.000236798	4.71276e-05	0	0	0	0	0	0	2.11535e-05	0	0	-1	1	0	0	-1	0	-1
Bacteria;Bacteroidetes;Bacteroidia;Bacteroidales;Porphyromonadaceae;Parabacteroides	0	13	0	0	0	0	1	0	0	3	0	0	0	0.00153919	0	0	0	0	4.65268e-05	0	0	3.17303e-05	0	0	-1	0	0	1	-1	0	-1
Bacteria;Bacteroidetes;Bacteroidia;Bacteroidales;Porphyromonadaceae;Parabacteroides;environmental samples	1	3	0	0	0	0	0	0	0	1	1	0	0.000322789	0.000355198	0	0	0	0	0	0	0	1.05768e-05	0.0001343	0	-1	0	0	0	-1	1	-1
Bacteria;Bacteroidetes;Bacteroidia;Bacteroidales;Prevotellaceae;Prevotella	0	0	0	0	0	0	0	0	0	1	0	0	0	0	0	0	0	0	0	0	0	1.05768e-05	0	0	0	0	0	0	-1	0	-1
Bacteria;Bacteroidetes;Flavobacteria;Flavobacteriales;Flavobacteriaceae;Capnocytophaga	0	0	0	0	0	0	0	0	0	131	0	0	0	0	0	0	0	0	0	0	0	0.00138555	0	0	0	0	0	0	-1	0	-1
Bacteria;Bacteroidetes;Flavobacteria;Flavobacteriales;Flavobacteriaceae;Capnocytophaga;environmental samples	0	0	0	0	0	0	0	0	0	138	0	0	0	0	0	0	0	0	0	0	0	0.00145959	0	0	0	0	0	0	-1	0	-1
Bacteria;Bacteroidetes;Flavobacteria;environmental samples	0	0	0	0	0	0	0	0	0	2	0	0	0	0	0	0	0	0	0	0	0	2.11535e-05	0	0	0	0	0	0	-1	0	-1
Bacteria;Bacteroidetes;Sphingobacteria;Sphingobacteriales;Flexibacteraceae;Cytophaga;environmental samples	0	0	0	0	0	0	0	0	0	2	0	0	0	0	0	0	0	0	0	0	0	2.11535e-05	0	0	0	0	0	0	-1	0	-1
Bacteria;Bacteroidetes;environmental samples	3	24	0	0	0	0	0	0	0	40	1	0	0.000968367	0.00284158	0	0	0	0	0	0	0	0.00042307	0.0001343	0	-1	0	0	0	-1	1	-1
Bacteria;Firmicutes;Bacillales	0	0	0	0	0	0	0	0	0	1	0	0	0	0	0	0	0	0	0	0	0	1.05768e-05	0	0	0	0	0	0	-1	0	-1
Bacteria;Firmicutes;Clostridia;Clostridiales;Heliobacteriaceae;Heliobacterium	0	1	0	0	0	0	0	0	0	0	0	0	0	0.000118399	0	0	0	0	0	0	0	0	0	0	-1	0	0	0	0	0	-1
Bacteria;Firmicutes;Clostridia;Clostridiales;Peptococcaceae;environmental samples	0	0	15	0	0	3	0	0	0	6	0	0	0	0	0.000706914	0	0	0.000378453	0	0	0	6.34605e-05	0	0	0	1	-1	0	-1	0	-1
Bacteria;Firmicutes;Clostridia;Clostridiales;Ruminococcaceae;Ruminococcus;environmental samples	7	2	0	1	0	0	1	6	6	0	0	14	0.00225952	0.000236798	0	3.95413e-05	0	0	4.65268e-05	0.000314185	0.000222247	0	0	0.00208302	1	-1	0	-1	1	-1	-1
Bacteria;Firmicutes;Clostridia;Clostridiales;Ruminococcaceae;Subdoligranulum;environmental samples	0	2	0	0	0	0	2	2	5	0	0	0	0	0.000236798	0	0	0	0	9.30536e-05	0.000104728	0.000185206	0	0	0	-1	0	0	-1	1	0	-1
Bacteria;Firmicutes;Clostridia;Clostridiales;Veillonellaceae	0	0	0	0	0	0	0	0	0	6	0	0	0	0	0	0	0	0	0	0	0	6.34605e-05	0	0	0	0	0	0	-1	0	-1
Bacteria;Firmicutes;Clostridia;Clostridiales;Veillonellaceae;Dialister	0	0	39	0	0	8	0	0	0	5	0	0	0	0	0.00183798	0	0	0.00100921	0	0	0	5.28838e-05	0	0	0	1	-1	0	-1	0	-1
Bacteria;Firmicutes;Clostridia;Clostridiales;Veillonellaceae;Dialister;environmental samples	0	0	19	0	0	2	0	0	0	2	0	0	0	0	0.000895424	0	0	0.000252302	0	0	0	2.11535e-05	0	0	0	1	-1	0	-1	0	-1
Bacteria;Firmicutes;Clostridia;Clostridiales;Veillonellaceae;Veillonella	0	0	0	0	0	1	0	0	0	0	0	0	0	0	0	0	0	0.000126151	0	0	0	0	0	0	0	0	-1	0	0	0	-1
Bacteria;Firmicutes;Lactobacillales;Lactobacillaceae;Lactobacillus	0	0	0	0	0	1	0	0	0	0	0	0	0	0	0	0	0	0.000126151	0	0	0	0	0	0	0	0	-1	0	0	0	-1
Bacteria;Proteobacteria;Alphaproteobacteria	0	0	0	0	0	1	0	0	0	79	2	0	0	0	0	0	0	0.000126151	0	0	0	0.000835563	0.000268601	0	0	0	-1	0	-1	1	-1
Bacteria;Proteobacteria;Alphaproteobacteria;Caulobacterales;Caulobacteraceae;Asticcacaulis;environmental samples	0	0	0	0	0	0	0	0	0	1	0	0	0	0	0	0	0	0	0	0	0	1.05768e-05	0	0	0	0	0	0	-1	0	-1
Bacteria;Proteobacteria;Alphaproteobacteria;Caulobacterales;Caulobacteraceae;Phenylobacterium;environmental samples	0	0	0	0	0	0	0	0	0	12	0	0	0	0	0	0	0	0	0	0	0	0.000126921	0	0	0	0	0	0	-1	0	-1
Bacteria;Proteobacteria;Alphaproteobacteria;Rhizobiales	0	0	0	0	0	0	0	0	0	23	0	0	0	0	0	0	0	0	0	0	0	0.000243265	0	0	0	0	0	0	-1	0	-1
Bacteria;Proteobacteria;Alphaproteobacteria;Rhizobiales;Aurantimonadaceae;Aerobacter	0	0	0	0	0	0	0	0	0	4	0	0	0	0	0	0	0	0	0	0	0	4.2307e-05	0	0	0	0	0	0	-1	0	-1
Bacteria;Proteobacteria;Alphaproteobacteria;Rhizobiales;Beijerinckiaceae;Chelatococcus;environmental samples	0	0	0	0	0	0	0	0	0	10	0	0	0	0	0	0	0	0	0	0	0	0.000105768	0	0	0	0	0	0	-1	0	-1
Bacteria;Proteobacteria;Alphaproteobacteria;Rhizobiales;Beijerinckiaceae;Methylocapsa;environmental samples	0	0	0	0	0	0	0	0	0	2	0	0	0	0	0	0	0	0	0	0	0	2.11535e-05	0	0	0	0	0	0	-1	0	-1
Bacteria;Proteobacteria;Alphaproteobacteria;Rhizobiales;Bradyrhizobiaceae;Bradyrhizobium	0	0	0	0	0	0	0	0	0	2	0	0	0	0	0	0	0	0	0	0	0	2.11535e-05	0	0	0	0	0	0	-1	0	-1
Bacteria;Proteobacteria;Alphaproteobacteria;Rhizobiales;Bradyrhizobiaceae;Bradyrhizobium;environmental samples	0	0	0	0	0	0	0	0	0	5	0	0	0	0	0	0	0	0	0	0	0	5.28838e-05	0	0	0	0	0	0	-1	0	-1
Bacteria;Proteobacteria;Alphaproteobacteria;Rhizobiales;Brucellaceae;Brucella	0	0	0	0	0	0	0	0	0	531	0	0	0	0	0	0	0	0	0	0	0	0.00561625	0	0	0	0	0	0	-1	0	-1
Bacteria;Proteobacteria;Alphaproteobacteria;Rhizobiales;Hyphomicrobiaceae;Ancalomicrobium	0	0	0	0	0	0	0	0	0	2	0	0	0	0	0	0	0	0	0	0	0	2.11535e-05	0	0	0	0	0	0	-1	0	-1
Bacteria;Proteobacteria;Alphaproteobacteria;Rhizobiales;Hyphomicrobiaceae;Blastochloris	0	0	0	0	0	0	0	0	0	5	0	0	0	0	0	0	0	0	0	0	0	5.28838e-05	0	0	0	0	0	0	-1	0	-1
Bacteria;Proteobacteria;Alphaproteobacteria;Rhizobiales;Hyphomicrobiaceae;Rhodoplanes	0	0	0	0	0	0	0	0	0	7	0	0	0	0	0	0	0	0	0	0	0	7.40373e-05	0	0	0	0	0	0	-1	0	-1
Bacteria;Proteobacteria;Alphaproteobacteria;Rhizobiales;Methylocystaceae;Methylopila	0	0	0	0	0	0	0	0	0	28	0	0	0	0	0	0	0	0	0	0	0	0.000296149	0	0	0	0	0	0	-1	0	-1
Bacteria;Proteobacteria;Alphaproteobacteria;Rhizobiales;Phyllobacteriaceae	0	0	0	0	0	0	0	0	0	10	0	0	0	0	0	0	0	0	0	0	0	0.000105768	0	0	0	0	0	0	-1	0	-1
Bacteria;Proteobacteria;Alphaproteobacteria;Rhizobiales;Phyllobacteriaceae;Aminobacter	0	0	0	0	0	0	0	0	0	53	0	0	0	0	0	0	0	0	0	0	0	0.000560568	0	0	0	0	0	0	-1	0	-1
Bacteria;Proteobacteria;Alphaproteobacteria;Rhizobiales;Phyllobacteriaceae;Aquamicrobium	0	0	0	0	0	0	0	0	0	5	0	0	0	0	0	0	0	0	0	0	0	5.28838e-05	0	0	0	0	0	0	-1	0	-1
Bacteria;Proteobacteria;Alphaproteobacteria;Rhizobiales;Phyllobacteriaceae;Aquamicrobium;environmental samples	0	0	0	0	0	0	0	0	0	3	0	0	0	0	0	0	0	0	0	0	0	3.17303e-05	0	0	0	0	0	0	-1	0	-1
Bacteria;Proteobacteria;Alphaproteobacteria;Rhizobiales;Phyllobacteriaceae;Chelatovorus	0	0	0	0	0	0	0	0	0	7	0	0	0	0	0	0	0	0	0	0	0	7.40373e-05	0	0	0	0	0	0	-1	0	-1
Bacteria;Proteobacteria;Alphaproteobacteria;Rhizobiales;Phyllobacteriaceae;Defluvibacter;environmental samples	0	0	0	0	0	0	0	0	0	4	0	0	0	0	0	0	0	0	0	0	0	4.2307e-05	0	0	0	0	0	0	-1	0	-1
Bacteria;Proteobacteria;Alphaproteobacteria;Rhizobiales;Phyllobacteriaceae;Hoeflea	0	0	0	0	0	0	0	0	0	3	0	0	0	0	0	0	0	0	0	0	0	3.17303e-05	0	0	0	0	0	0	-1	0	-1
Bacteria;Proteobacteria;Alphaproteobacteria;Rhizobiales;Phyllobacteriaceae;Nitratireductor;environmental samples	0	0	0	0	0	0	0	0	0	1	0	0	0	0	0	0	0	0	0	0	0	1.05768e-05	0	0	0	0	0	0	-1	0	-1
Bacteria;Proteobacteria;Alphaproteobacteria;Rhizobiales;Phyllobacteriaceae;Phyllobacterium;environmental samples	0	0	0	0	0	0	0	0	0	2	0	0	0	0	0	0	0	0	0	0	0	2.11535e-05	0	0	0	0	0	0	-1	0	-1
Bacteria;Proteobacteria;Alphaproteobacteria;Rhizobiales;Phyllobacteriaceae;Pseudaminobacter	0	0	0	0	0	0	0	0	0	6	0	0	0	0	0	0	0	0	0	0	0	6.34605e-05	0	0	0	0	0	0	-1	0	-1
Bacteria;Proteobacteria;Alphaproteobacteria;Rhizobiales;Reichenowia	0	0	0	0	0	0	0	0	0	5	0	0	0	0	0	0	0	0	0	0	0	5.28838e-05	0	0	0	0	0	0	-1	0	-1
Bacteria;Proteobacteria;Alphaproteobacteria;Rhizobiales;Rhizobiaceae	0	0	0	0	0	0	0	0	0	8	0	0	0	0	0	0	0	0	0	0	0	8.4614e-05	0	0	0	0	0	0	-1	0	-1
Bacteria;Proteobacteria;Alphaproteobacteria;Rhizobiales;Rhizobiaceae;Amorphomonas	0	0	0	0	0	0	0	0	0	6	0	0	0	0	0	0	0	0	0	0	0	6.34605e-05	0	0	0	0	0	0	-1	0	-1
Bacteria;Proteobacteria;Alphaproteobacteria;Rhizobiales;Rhizobiaceae;Rhizobium/Agrobacterium group;Agrobacterium;environmental samples	0	0	0	0	0	0	0	0	0	5	0	0	0	0	0	0	0	0	0	0	0	5.28838e-05	0	0	0	0	0	0	-1	0	-1
Bacteria;Proteobacteria;Alphaproteobacteria;Rhizobiales;Rhizobiaceae;Sinorhizobium/Ensifer group;Sinorhizobium;environmental samples	0	0	0	0	0	0	0	0	0	11	0	0	0	0	0	0	0	0	0	0	0	0.000116344	0	0	0	0	0	0	-1	0	-1
Bacteria;Proteobacteria;Alphaproteobacteria;Rhizobiales;Xanthobacteraceae;Ancylobacter;environmental samples	0	0	0	0	0	0	0	0	0	2	0	0	0	0	0	0	0	0	0	0	0	2.11535e-05	0	0	0	0	0	0	-1	0	-1
Bacteria;Proteobacteria;Alphaproteobacteria;Rhizobiales;Xanthobacteraceae;Starkeya	0	0	0	0	0	0	0	0	0	5	0	0	0	0	0	0	0	0	0	0	0	5.28838e-05	0	0	0	0	0	0	-1	0	-1
Bacteria;Proteobacteria;Alphaproteobacteria;Rhizobiales;Xanthobacteraceae;unclassified Xanthobacteraceae	0	0	0	0	0	0	0	0	0	5	0	0	0	0	0	0	0	0	0	0	0	5.28838e-05	0	0	0	0	0	0	-1	0	-1
Bacteria;Proteobacteria;Alphaproteobacteria;Rhodobacterales;Rhodobacteraceae	0	0	0	0	0	0	0	0	0	1	0	0	0	0	0	0	0	0	0	0	0	1.05768e-05	0	0	0	0	0	0	-1	0	-1
Bacteria;Proteobacteria;Alphaproteobacteria;Rhodobacterales;Rhodobacteraceae;Rhodobacter	0	0	0	0	0	0	0	0	0	1	0	0	0	0	0	0	0	0	0	0	0	1.05768e-05	0	0	0	0	0	0	-1	0	-1
Bacteria;Proteobacteria;Alphaproteobacteria;Rhodobacterales;Rhodobacteraceae;Rhodobacter;environmental samples	0	0	0	0	0	0	0	0	0	4	0	0	0	0	0	0	0	0	0	0	0	4.2307e-05	0	0	0	0	0	0	-1	0	-1
Bacteria;Proteobacteria;Alphaproteobacteria;Rhodospirillales;Rhodospirillaceae;Inquilinus;environmental samples	0	0	0	0	0	0	0	0	0	1	0	0	0	0	0	0	0	0	0	0	0	1.05768e-05	0	0	0	0	0	0	-1	0	-1
Bacteria;Proteobacteria;Alphaproteobacteria;Rickettsiales;Holosporaceae;Holospora;environmental samples	0	0	0	0	0	0	0	0	0	3	0	0	0	0	0	0	0	0	0	0	0	3.17303e-05	0	0	0	0	0	0	-1	0	-1
Bacteria;Proteobacteria;Alphaproteobacteria;Rickettsiales;Rickettsiaceae;Rickettsieae;Orientia	0	0	0	0	0	0	0	0	0	4	0	0	0	0	0	0	0	0	0	0	0	4.2307e-05	0	0	0	0	0	0	-1	0	-1
Bacteria;Proteobacteria;Alphaproteobacteria;environmental samples	0	0	0	0	0	1	0	0	0	8671	212	0	0	0	0	0	0	0.000126151	0	0	0	0.091711	0.0284717	0	0	0	-1	0	-1	1	-1
Bacteria;Proteobacteria;Betaproteobacteria;Burkholderiales;Alcaligenaceae;Achromobacter	0	0	0	0	0	0	0	0	0	1	0	0	0	0	0	0	0	0	0	0	0	1.05768e-05	0	0	0	0	0	0	-1	0	-1
Bacteria;Proteobacteria;Betaproteobacteria;Burkholderiales;Comamonadaceae;Acidovorax;environmental samples	0	0	0	0	0	0	0	0	0	4	0	0	0	0	0	0	0	0	0	0	0	4.2307e-05	0	0	0	0	0	0	-1	0	-1
Bacteria;Proteobacteria;Betaproteobacteria;Burkholderiales;Comamonadaceae;Brachymonas	2	1	0	0	0	1	0	0	0	1	0	0	0.000645578	0.000118399	0	0	0	0.000126151	0	0	0	1.05768e-05	0	0	1	0	-1	0	-1	0	-1
Bacteria;Proteobacteria;Betaproteobacteria;Neisseriales;Neisseriaceae;Neisseria	0	0	0	0	0	3	0	0	0	0	0	0	0	0	0	0	0	0.000378453	0	0	0	0	0	0	0	0	-1	0	0	0	-1
Bacteria;Proteobacteria;Betaproteobacteria;Neisseriales;Neisseriaceae;Neisseria;environmental samples	0	0	0	0	0	2	0	0	0	0	0	0	0	0	0	0	0	0.000252302	0	0	0	0	0	0	0	0	-1	0	0	0	-1
Bacteria;Proteobacteria;Deltaproteobacteria	0	0	0	0	0	0	0	0	0	2	0	0	0	0	0	0	0	0	0	0	0	2.11535e-05	0	0	0	0	0	0	-1	0	-1
Bacteria;Proteobacteria;Deltaproteobacteria;Desulfuromonadales;Geobacteraceae;environmental samples	0	0	0	1	0	0	0	0	0	0	0	0	0	0	0	3.95413e-05	0	0	0	0	0	0	0	0	0	-1	0	0	0	0	-1
Bacteria;Proteobacteria;Gammaproteobacteria;Candidatus Nardonella	0	0	3	10	10	4	9	4	8	4	0	5	0	0	0.000141383	0.000395413	0.000466179	0.000504605	0.000418741	0.000209457	0.000296329	4.2307e-05	0	0.000743937	0	-1	-1	1	1	-1	-1
Bacteria;Proteobacteria;Gammaproteobacteria;Enterobacteriales;Enterobacteriaceae;Buchnera	0	0	2	24	23	43	12	5	13	0	0	19	0	0	9.42551e-05	0.000948992	0.00107221	0.0054245	0.000558321	0.000261821	0.000481535	0	0	0.00282696	0	-1	-1	1	1	-1	-1
Bacteria;Proteobacteria;Gammaproteobacteria;Enterobacteriales;Enterobacteriaceae;Dickeya	0	0	8	21	9	3	14	14	12	4	0	7	0	0	0.000377021	0.000830368	0.000419561	0.000378453	0.000651375	0.000733099	0.000444494	4.2307e-05	0	0.00104151	0	-1	1	-1	1	-1	-1
Bacteria;Proteobacteria;Gammaproteobacteria;Enterobacteriales;Enterobacteriaceae;Klebsiella;environmental samples	0	0	6	8	4	3	14	5	9	3	0	3	0	0	0.000282765	0.000316331	0.000186471	0.000378453	0.000651375	0.000261821	0.00033337	3.17303e-05	0	0.000446362	0	-1	-1	1	1	-1	-1
Bacteria;Proteobacteria;Gammaproteobacteria;Enterobacteriales;Enterobacteriaceae;Pantoea;environmental samples	0	0	8	3	6	3	3	3	9	4	0	5	0	0	0.000377021	0.000118624	0.000279707	0.000378453	0.00013958	0.000157093	0.00033337	4.2307e-05	0	0.000743937	0	1	-1	-1	1	-1	-1
Bacteria;Proteobacteria;Gammaproteobacteria;Enterobacteriales;environmental samples	0	0	0	3	0	0	0	0	1	0	0	2	0	0	0	0.000118624	0	0	0	0	3.70412e-05	0	0	0.000297575	0	-1	0	0	1	-1	-1
Bacteria;Proteobacteria;Gammaproteobacteria;Oceanospirillales;Halomonadaceae;Modicisalibacter	0	0	0	0	0	1	0	0	0	0	0	0	0	0	0	0	0	0.000126151	0	0	0	0	0	0	0	0	-1	0	0	0	-1
Bacteria;Proteobacteria;Gammaproteobacteria;Oceanospirillales;Saccharospirillaceae;Saccharospirillum;environmental samples	0	0	0	0	0	0	0	0	0	1	0	0	0	0	0	0	0	0	0	0	0	1.05768e-05	0	0	0	0	0	0	-1	0	-1
Bacteria;Proteobacteria;Gammaproteobacteria;Pasteurellales;Pasteurellaceae;Actinobacillus	0	0	0	0	0	0	0	0	0	1	0	0	0	0	0	0	0	0	0	0	0	1.05768e-05	0	0	0	0	0	0	-1	0	-1
Bacteria;Proteobacteria;Gammaproteobacteria;Pasteurellales;Pasteurellaceae;Aggregatibacter	0	0	0	0	0	0	0	0	0	16	0	0	0	0	0	0	0	0	0	0	0	0.000169228	0	0	0	0	0	0	-1	0	-1
Bacteria;Proteobacteria;Gammaproteobacteria;Pasteurellales;Pasteurellaceae;Mannheimia	0	0	0	0	0	0	0	0	0	39	0	0	0	0	0	0	0	0	0	0	0	0.000412493	0	0	0	0	0	0	-1	0	-1
Bacteria;Proteobacteria;Gammaproteobacteria;Vibrionales;Vibrionaceae;Aliivibrio	0	0	0	0	0	0	0	3	0	0	0	0	0	0	0	0	0	0	0	0.000157093	0	0	0	0	0	0	0	-1	0	0	-1
Bacteria;Proteobacteria;Gammaproteobacteria;Vibrionales;environmental samples	0	0	0	0	0	1	0	0	0	0	0	0	0	0	0	0	0	0.000126151	0	0	0	0	0	0	0	0	-1	0	0	0	-1
Bacteria;Proteobacteria;Gammaproteobacteria;Xanthomonadales;Xanthomonadaceae;Thermomonas	0	0	0	0	0	0	0	0	0	2	0	0	0	0	0	0	0	0	0	0	0	2.11535e-05	0	0	0	0	0	0	-1	0	-1
Eukaryota;Fungi;Fungi incertae sedis;Basal fungal lineages;Mucoromycotina;Mucorales;Mucoraceae;Rhizopus	0	0	0	0	0	0	0	0	0	2	0	0	0	0	0	0	0	0	0	0	0	2.11535e-05	0	0	0	0	0	0	-1	0	-1
unclassified sequences;metagenomes;ecological metagenomes	0	0	0	0	0	0	0	0	0	1	0	0	0	0	0	0	0	0	0	0	0	1.05768e-05	0	0	0	0	0	0	-1	0	-1
Bacteria;Actinobacteria;Coriobacteridae;Coriobacteriales;Coriobacterineae;Coriobacteriaceae;Collinsella	0	2	0	0	0	0	0	0	0	9	0	0	0	0.000236798	0	0	0	0	0	0	0	9.51908e-05	0	0	-1	0	0	0	-1	0	-2
Bacteria;Actinobacteria;Coriobacteridae;Coriobacteriales;Coriobacterineae;Coriobacteriaceae;Coriobacterium	4	9	0	1	0	0	1	1	0	9	0	0	0.00129116	0.00106559	0	3.95413e-05	0	0	4.65268e-05	5.23642e-05	0	9.51908e-05	0	0	1	-1	0	-1	-1	0	-2
Bacteria;Actinobacteria;environmental samples	5	5	15	20	11	5	7	11	14	34	0	9	0.00161394	0.000591996	0.000706914	0.000790826	0.000512797	0.000630756	0.000325687	0.000576007	0.000518576	0.00035961	0	0.00133909	1	-1	-1	-1	1	-1	-2
Bacteria;Bacteroidetes;Bacteroidia;Bacteroidales;Bacteroidaceae;Bacteroides;environmental samples	0	6	4	0	0	0	0	0	0	4	0	1	0	0.000710395	0.00018851	0	0	0	0	0	0	4.2307e-05	0	0.000148787	-1	1	0	0	-1	-1	-2
Bacteria;Bacteroidetes;Bacteroidia;Bacteroidales;Prevotellaceae;environmental samples	0	1	1	0	0	1	0	0	0	1	0	0	0	0.000118399	4.71276e-05	0	0	0.000126151	0	0	0	1.05768e-05	0	0	-1	1	-1	0	-1	0	-2
Bacteria;Firmicutes;Clostridia;Clostridiales;Clostridiaceae;Clostridium;environmental samples	69	42	0	2	2	9	1	2	6	2	4	9	0.0222724	0.00497277	0	7.90826e-05	9.32357e-05	0.00113536	4.65268e-05	0.000104728	0.000222247	2.11535e-05	0.000537201	0.00133909	1	-1	-1	-1	1	-1	-2
Bacteria;Firmicutes;Clostridia;Clostridiales;Heliobacteriaceae;Heliorestis	0	2	0	0	0	0	0	0	0	1	0	0	0	0.000236798	0	0	0	0	0	0	0	1.05768e-05	0	0	-1	0	0	0	-1	0	-2
Bacteria;Firmicutes;Clostridia;Clostridiales;Lachnospiraceae;environmental samples	12	74	25	31	24	9	66	50	117	66	30	104	0.00387347	0.00876154	0.00117819	0.00122578	0.00111883	0.00113536	0.00307077	0.00261821	0.00433381	0.000698066	0.00402901	0.0154739	-1	-1	-1	1	1	-1	-2
Bacteria;Firmicutes;Erysipelotrichi;Erysipelotrichales;Erysipelotrichaceae	0	0	0	0	0	1	0	0	0	0	0	1	0	0	0	0	0	0.000126151	0	0	0	0	0	0.000148787	0	0	-1	0	0	-1	-2
Bacteria;Fusobacteria;Fusobacteriales;Fusobacteriaceae;Fusobacterium;environmental samples	0	0	0	2	0	0	0	0	0	4	0	0	0	0	0	7.90826e-05	0	0	0	0	0	4.2307e-05	0	0	0	-1	0	0	-1	0	-2
Bacteria;Proteobacteria;Gammaproteobacteria;Enterobacteriales;Enterobacteriaceae;Enterobacter;Enterobacter cloacae complex	1	3	336	415	321	163	501	357	452	222	3	56	0.000322789	0.000355198	0.0158349	0.0164096	0.0149643	0.0205626	0.0233099	0.018694	0.0167426	0.00234804	0.000402901	0.00833209	-1	-1	-1	1	1	-1	-2
Bacteria;Proteobacteria;Gammaproteobacteria;Enterobacteriales;Enterobacteriaceae;Leclercia	0	1	422	26	295	143	30	17	38	187	1	9	0	0.000118399	0.0198878	0.00102807	0.0137523	0.0180396	0.0013958	0.000890192	0.00140756	0.00197785	0.0001343	0.00133909	-1	1	-1	1	-1	-1	-2
Bacteria;Proteobacteria;Gammaproteobacteria;Enterobacteriales;Enterobacteriaceae;Rahnella	0	0	3	5	0	1	0	1	1	0	0	0	0	0	0.000141383	0.000197707	0	0.000126151	0	5.23642e-05	3.70412e-05	0	0	0	0	-1	-1	-1	1	0	-2
Bacteria;Proteobacteria;Gammaproteobacteria;Legionellales;Legionellaceae;Legionella;environmental samples	0	0	11	19	14	6	14	18	10	3	0	0	0	0	0.000518403	0.000751285	0.00065265	0.000756907	0.000651375	0.000942556	0.000370412	3.17303e-05	0	0	0	-1	-1	-1	1	0	-2
Bacteria;Proteobacteria;Gammaproteobacteria;Oceanospirillales;Halomonadaceae;Halomonas	0	0	2	3	1	2	3	3	5	3	0	0	0	0	9.42551e-05	0.000118624	4.66179e-05	0.000252302	0.00013958	0.000157093	0.000185206	3.17303e-05	0	0	0	-1	-1	-1	1	0	-2
Bacteria;Proteobacteria;Gammaproteobacteria;Vibrionales;Vibrionaceae;Vibrio;environmental samples	0	0	0	0	0	1	0	1	0	0	0	0	0	0	0	0	0	0.000126151	0	5.23642e-05	0	0	0	0	0	0	-1	-1	0	0	-2
Bacteria;Bacteroidetes;Bacteroidia;Bacteroidales;environmental samples	14	225	0	2	0	1	0	0	0	106	37	6	0.00451904	0.0266398	0	7.90826e-05	0	0.000126151	0	0	0	0.00112114	0.00496911	0.000892724	-1	-1	-1	0	-1	1	-3
Bacteria;Firmicutes;Clostridia;Clostridiales;Ruminococcaceae;Faecalibacterium;environmental samples	0	0	0	1	1	1	0	2	1	0	0	3	0	0	0	3.95413e-05	4.66179e-05	0.000126151	0	0.000104728	3.70412e-05	0	0	0.000446362	0	-1	-1	-1	1	-1	-3
Bacteria;Fusobacteria;Fusobacteriales;Fusobacteriaceae;Fusobacterium	0	0	0	6	0	0	0	0	0	8	0	1	0	0	0	0.000237248	0	0	0	0	0	8.4614e-05	0	0.000148787	0	-1	0	0	-1	-1	-3
Bacteria;Fusobacteria;environmental samples	0	0	0	3	0	3	0	0	0	4	0	0	0	0	0	0.000118624	0	0.000378453	0	0	0	4.2307e-05	0	0	0	-1	-1	0	-1	0	-3
Bacteria;Actinobacteria;Coriobacteridae;Coriobacteriales;Coriobacterineae;Coriobacteriaceae;Coriobacterium;environmental samples	0	1	0	1	0	0	0	0	0	1	0	2	0	0.000118399	0	3.95413e-05	0	0	0	0	0	1.05768e-05	0	0.000297575	-1	-1	0	0	-1	-1	-4
Bacteria;Firmicutes;Clostridia;Clostridiales;Clostridiaceae;environmental samples	0	1	0	1	0	1	0	0	0	1	0	0	0	0.000118399	0	3.95413e-05	0	0.000126151	0	0	0	1.05768e-05	0	0	-1	-1	-1	0	-1	0	-4
Bacteria;Firmicutes;Clostridia;Clostridiales;Eubacteriaceae;Eubacterium;environmental samples	11	76	0	0	0	1	2	2	5	34	10	14	0.00355068	0.00899834	0	0	0	0.000126151	9.30536e-05	0.000104728	0.000185206	0.00035961	0.001343	0.00208302	-1	0	-1	-1	-1	-1	-5
																								1
Table S4B. Consistency scores for CRC associated microbiome shifts - RDP													Patients A-F; off = off-tumor; on = tumor; f.1-12 = fraction of sequence read
													Aoff	Aon	Boff	Bon	Coff	Con	Doff	Don	Eoff	Eon	Foff	Fon	score						consistency
Terminal Clade	n.1	n.2	n.3	n.4	n.5	n.6	n.7	n.8	n.9	n.10	n.11	n.12	f.1	f.2	f.3	f.4	f.5	f.6	f.7	f.8	f.9	f.10	f.11	f.12	1<>2	3<>4	5<>6	7<>8	9<>10	11<>12	score
Bacteria;Firmicutes;Clostridia;Clostridiales;Incertae Sedis XIII;Anaerovorax	8	9	17	0	3	0	52	0	0	1	3	0	0.00258231	0.00106559	0.000801169	0	0.000139854	0	0.00241939	0	0	1.05768e-05	0.000402901	0	1	1	1	1	-1	1	4
Bacteria;Firmicutes;Clostridia;Clostridiales;Ruminococcaceae;unclassified_Ruminococcaceae	247	135	2	0	23	8	200	11	23	28	22	24	0.0797289	0.0159839	9.42551e-05	0	0.00107221	0.00100921	0.00930536	0.000576007	0.000851947	0.000296149	0.00295461	0.0035709	1	1	1	1	1	-1	4
Bacteria;Proteobacteria;Gammaproteobacteria;Enterobacteriales;Enterobacteriaceae;Citrobacter	6	4	422	316	402	129	394	263	426	193	9	44	0.00193673	0.000473597	0.0198878	0.0124951	0.0187404	0.0162735	0.0183315	0.0137718	0.0157795	0.00204131	0.0012087	0.00654664	1	1	1	1	1	-1	4
Bacteria;Proteobacteria;Gammaproteobacteria;Enterobacteriales;Enterobacteriaceae;Shigella	24	22	2028	2381	1338	482	2157	1021	1554	1042	29	626	0.00774693	0.00260478	0.0955747	0.0941479	0.0623747	0.0608048	0.100358	0.0534639	0.057562	0.011021	0.00389471	0.0931409	1	1	1	1	1	-1	4
Bacteria;unclassified_Bacteria	21	38	2	0	83	3	6	2	5	1530	59	4	0.00677857	0.00449917	9.42551e-05	0	0.00386928	0.000378453	0.000279161	0.000104728	0.000185206	0.0161824	0.00792372	0.00059515	1	1	1	1	-1	1	4
Bacteria;Firmicutes;Clostridia;Clostridiales;Clostridiaceae;Clostridiaceae 1;Clostridium	374	203	0	0	11	4	5	0	0	0	0	0	0.120723	0.024035	0	0	0.000512797	0.000504605	0.000232634	0	0	0	0	0	1	0	1	1	0	0	3
Bacteria;Firmicutes;Clostridia;Clostridiales;Incertae Sedis XI;Peptoniphilus	0	0	1	0	0	0	1	0	0	0	1	0	0	0	4.71276e-05	0	0	0	4.65268e-05	0	0	0	0.0001343	0	0	1	0	1	0	1	3
Bacteria;Actinobacteria;Actinobacteria;Actinobacteridae;Actinomycetales;Propionibacterineae;Nocardioidaceae;unclassified_Nocardioidaceae	0	0	9	9	9	3	3	5	12	1	0	0	0	0	0.000424148	0.000355872	0.000419561	0.000378453	0.00013958	0.000261821	0.000444494	1.05768e-05	0	0	0	1	1	-1	1	0	2
Bacteria;Firmicutes;Bacilli;Bacillales;Bacillaceae;Bacillaceae 1;Bacillus;Bacillus c	1	0	0	0	0	0	0	0	1	0	0	0	0.000322789	0	0	0	0	0	0	0	3.70412e-05	0	0	0	1	0	0	0	1	0	2
Bacteria;Firmicutes;Bacilli;Bacillales;Paenibacillaceae;Paenibacillaceae 1;Paenibacillus	0	0	0	0	22	0	0	0	0	0	1	0	0	0	0	0	0.00102559	0	0	0	0	0	0.0001343	0	0	0	1	0	0	1	2
Bacteria;Firmicutes;Clostridia;Clostridiales;Heliobacteriaceae;Heliobacterium	1	1	0	0	1	0	0	0	0	0	0	0	0.000322789	0.000118399	0	0	4.66179e-05	0	0	0	0	0	0	0	1	0	1	0	0	0	2
Bacteria;Firmicutes;Clostridia;Clostridiales;Ruminococcaceae;Anaerotruncus	1	2	0	0	0	0	0	0	0	0	3	0	0.000322789	0.000236798	0	0	0	0	0	0	0	0	0.000402901	0	1	0	0	0	0	1	2
Bacteria;Firmicutes;Clostridia;Clostridiales;unclassified_Clostridiales	58	733	66	5	470	16	28	3	12	25	15	26	0.0187218	0.0867866	0.00311042	0.000197707	0.0219104	0.00201842	0.00130275	0.000157093	0.000444494	0.000264419	0.0020145	0.00386847	-1	1	1	1	1	-1	2
Bacteria;Proteobacteria;Betaproteobacteria;Burkholderiales;Comamonadaceae;unclassified_Comamonadaceae	3	0	0	0	0	0	0	0	0	0	1	0	0.000968367	0	0	0	0	0	0	0	0	0	0.0001343	0	1	0	0	0	0	1	2
Bacteria;Proteobacteria;Betaproteobacteria;Rhodocyclales;Rhodocyclaceae;unclassified_Rhodocyclaceae	1	0	0	0	0	0	1	0	0	0	0	0	0.000322789	0	0	0	0	0	4.65268e-05	0	0	0	0	0	1	0	0	1	0	0	2
Bacteria;Proteobacteria;Deltaproteobacteria;Desulfovibrionales;Desulfovibrionaceae;Desulfovibrio	0	0	7	0	0	0	14	0	0	6	2	0	0	0	0.000329893	0	0	0	0.000651375	0	0	6.34605e-05	0.000268601	0	0	1	0	1	-1	1	2
Bacteria;Proteobacteria;Gammaproteobacteria;Enterobacteriales;Enterobacteriaceae;Enterobacter	49	30	2498	2619	1957	916	2652	1766	2564	1293	57	530	0.0158167	0.00355198	0.117725	0.103559	0.0912312	0.115554	0.123389	0.0924753	0.0949735	0.0136757	0.00765512	0.0788573	1	1	-1	1	1	-1	2
Bacteria;Proteobacteria;Gammaproteobacteria;Enterobacteriales;Enterobacteriaceae;Kluyvera	0	0	1	0	1	0	1	1	2	0	0	0	0	0	4.71276e-05	0	4.66179e-05	0	4.65268e-05	5.23642e-05	7.40823e-05	0	0	0	0	1	1	-1	1	0	2
Bacteria;Proteobacteria;Gammaproteobacteria;Enterobacteriales;Enterobacteriaceae;Plesiomonas	0	0	1	1	0	0	1	0	0	0	0	0	0	0	4.71276e-05	3.95413e-05	0	0	4.65268e-05	0	0	0	0	0	0	1	0	1	0	0	2
Bacteria;Proteobacteria;Gammaproteobacteria;Enterobacteriales;Enterobacteriaceae;Pragia	1	0	171	66	25	42	36	18	31	4	1	7	0.000322789	0	0.00805882	0.00260973	0.00116545	0.00529835	0.00167496	0.000942556	0.00114828	4.2307e-05	0.0001343	0.00104151	1	1	-1	1	1	-1	2
Bacteria;Proteobacteria;Gammaproteobacteria;Enterobacteriales;Enterobacteriaceae;Salmonella	14	8	792	1069	726	261	1466	691	1017	662	29	171	0.00451904	0.000947194	0.037325	0.0422697	0.0338446	0.0329254	0.0682083	0.0361837	0.0376709	0.00700181	0.00389471	0.0254426	1	-1	1	1	1	-1	2
Unclassified	184	203	543	576	554	180	346	400	504	840	30	53	0.0593932	0.024035	0.0255903	0.0227758	0.0258263	0.0227072	0.0160983	0.0209457	0.0186687	0.00888447	0.00402901	0.00788573	1	1	1	-1	1	-1	2
Bacteria;Acidobacteria;Acidobacteria;Acidobacteriales;Acidobacteriaceae;Gp16	1	0	0	0	0	0	0	0	0	0	0	0	0.000322789	0	0	0	0	0	0	0	0	0	0	0	1	0	0	0	0	0	1
Bacteria;Actinobacteria;Actinobacteria;Acidimicrobidae;Acidimicrobiales;Acidimicrobineae;Acidimicrobiaceae;Acidimicrobium	1	0	0	0	0	0	0	0	0	0	0	0	0.000322789	0	0	0	0	0	0	0	0	0	0	0	1	0	0	0	0	0	1
Bacteria;Actinobacteria;Actinobacteria;Actinobacteridae;Actinomycetales;Frankineae;Nakamurellaceae;Nakamurella	0	0	0	0	0	0	0	0	0	0	1	0	0	0	0	0	0	0	0	0	0	0	0.0001343	0	0	0	0	0	0	1	1
Bacteria;Actinobacteria;Actinobacteria;Actinobacteridae;Actinomycetales;Micrococcineae;Microbacteriaceae;unclassified_Microbacteriaceae	0	0	0	0	1	0	0	0	0	0	0	0	0	0	0	0	4.66179e-05	0	0	0	0	0	0	0	0	0	1	0	0	0	1
Bacteria;Actinobacteria;Actinobacteria;Actinobacteridae;Actinomycetales;Micromonosporineae;Micromonosporaceae;unclassified_Micromonosporaceae	0	0	0	0	1	0	0	0	0	0	0	0	0	0	0	0	4.66179e-05	0	0	0	0	0	0	0	0	0	1	0	0	0	1
Bacteria;Actinobacteria;Actinobacteria;Actinobacteridae;Actinomycetales;Propionibacterineae;Nocardioidaceae;Nocardioides	0	1	57	56	51	13	20	39	49	24	0	0	0	0.000118399	0.00268627	0.00221431	0.00237751	0.00163996	0.000930536	0.00204221	0.00181502	0.000253842	0	0	-1	1	1	-1	1	0	1
Bacteria;Actinobacteria;Actinobacteria;Actinobacteridae;Bifidobacteriales;Bifidobacteriaceae;Bifidobacterium	0	0	0	0	0	0	0	0	1	0	0	0	0	0	0	0	0	0	0	0	3.70412e-05	0	0	0	0	0	0	0	1	0	1
Bacteria;Actinobacteria;Actinobacteria;Coriobacteridae;Coriobacteriales;Coriobacterineae;Coriobacteriaceae;Olsenella	1	1	16	1	0	0	2	0	0	1	4	4	0.000322789	0.000118399	0.000754041	3.95413e-05	0	0	9.30536e-05	0	0	1.05768e-05	0.000537201	0.00059515	1	1	0	1	-1	-1	1
Bacteria;Bacteroidetes;Bacteroidetes;Bacteroidales;Bacteroidaceae;Megamonas	1	0	0	0	0	0	0	0	0	0	0	0	0.000322789	0	0	0	0	0	0	0	0	0	0	0	1	0	0	0	0	0	1
Bacteria;Bacteroidetes;Bacteroidetes;Bacteroidales;Rikenellaceae;unclassified_Rikenellaceae	0	0	0	0	0	0	0	0	0	0	3	0	0	0	0	0	0	0	0	0	0	0	0.000402901	0	0	0	0	0	0	1	1
Bacteria;Bacteroidetes;Bacteroidetes;Bacteroidales;unclassified_Bacteroidales	2	84	2	1	18	2	0	0	0	89	849	2	0.000645578	0.00994554	9.42551e-05	3.95413e-05	0.000839122	0.000252302	0	0	0	0.000941331	0.114021	0.000297575	-1	1	1	0	-1	1	1
Bacteria;Bacteroidetes;Flavobacteria;Flavobacteriales;Flavobacteriaceae;Tenacibaculum	0	0	4	0	0	0	0	0	0	0	0	0	0	0	0.00018851	0	0	0	0	0	0	0	0	0	0	1	0	0	0	0	1
Bacteria;Bacteroidetes;Flavobacteria;Flavobacteriales;Flavobacteriaceae;unclassified_Flavobacteriaceae	1	0	0	0	0	0	0	0	0	5	1	0	0.000322789	0	0	0	0	0	0	0	0	5.28838e-05	0.0001343	0	1	0	0	0	-1	1	1
Bacteria;Bacteroidetes;Sphingobacteria;Sphingobacteriales;Flexibacteraceae;unclassified_Flexibacteraceae	1	0	0	0	0	0	0	0	0	369	9	0	0.000322789	0	0	0	0	0	0	0	0	0.00390282	0.0012087	0	1	0	0	0	-1	1	1
Bacteria;Chloroflexi;Chloroflexi;Chloroflexales;Chloroflexaceae;Roseiflexus	0	0	0	0	0	0	0	0	0	0	1	0	0	0	0	0	0	0	0	0	0	0	0.0001343	0	0	0	0	0	0	1	1
Bacteria;Cyanobacteria;Cyanobacteria;Chloroplast;Streptophyta	0	0	0	0	0	0	0	0	0	0	1	0	0	0	0	0	0	0	0	0	0	0	0.0001343	0	0	0	0	0	0	1	1
Bacteria;Firmicutes;Bacilli;Bacillales;Bacillaceae;Bacillaceae 1;Geobacillus	0	0	0	0	2	0	0	0	0	0	0	0	0	0	0	0	9.32357e-05	0	0	0	0	0	0	0	0	0	1	0	0	0	1
Bacteria;Firmicutes;Bacilli;Bacillales;Bacillaceae;Bacillaceae 2;Incertae Sedis	0	0	0	0	0	0	0	0	0	0	2	0	0	0	0	0	0	0	0	0	0	0	0.000268601	0	0	0	0	0	0	1	1
Bacteria;Firmicutes;Bacilli;Bacillales;Listeriaceae;Listeria	0	0	0	0	0	0	1	0	0	0	0	0	0	0	0	0	0	0	4.65268e-05	0	0	0	0	0	0	0	0	1	0	0	1
Bacteria;Firmicutes;Bacilli;Bacillales;Paenibacillaceae;Paenibacillaceae 1;Cohnella	0	0	0	0	5	0	0	0	0	0	0	0	0	0	0	0	0.000233089	0	0	0	0	0	0	0	0	0	1	0	0	0	1
Bacteria;Firmicutes;Bacilli;Bacillales;Paenibacillaceae;Paenibacillaceae 1;unclassified_Paenibacillaceae 1	0	0	0	0	3	0	0	0	0	0	0	0	0	0	0	0	0.000139854	0	0	0	0	0	0	0	0	0	1	0	0	0	1
Bacteria;Firmicutes;Bacilli;Lactobacillales;Carnobacteriaceae;Carnobacteriaceae 1;Carnobacterium	4	0	0	0	0	0	0	0	0	0	0	0	0.00129116	0	0	0	0	0	0	0	0	0	0	0	1	0	0	0	0	0	1
Bacteria;Firmicutes;Bacilli;Lactobacillales;Carnobacteriaceae;Carnobacteriaceae 2;Granulicatella	36	0	1	0	0	108	14	0	0	10	0	0	0.0116204	0	4.71276e-05	0	0	0.0136243	0.000651375	0	0	0.000105768	0	0	1	1	-1	1	-1	0	1
Bacteria;Firmicutes;Bacilli;Lactobacillales;Leuconostocaceae;Leuconostoc	0	0	0	0	0	0	0	0	0	0	2	0	0	0	0	0	0	0	0	0	0	0	0.000268601	0	0	0	0	0	0	1	1
Bacteria;Firmicutes;Clostridia;Clostridiales;Clostridiaceae;Clostridiaceae 1;Sarcina	6	1	0	0	0	0	0	0	0	0	0	0	0.00193673	0.000118399	0	0	0	0	0	0	0	0	0	0	1	0	0	0	0	0	1
Bacteria;Firmicutes;Clostridia;Clostridiales;Gracilibacteraceae;Gracilibacter	2	1	0	0	0	0	0	0	0	0	0	0	0.000645578	0.000118399	0	0	0	0	0	0	0	0	0	0	1	0	0	0	0	0	1
Bacteria;Firmicutes;Clostridia;Clostridiales;Heliobacteriaceae;unclassified_Heliobacteriaceae	10	4	0	0	0	0	0	0	0	0	0	0	0.00322789	0.000473597	0	0	0	0	0	0	0	0	0	0	1	0	0	0	0	0	1
Bacteria;Firmicutes;Clostridia;Clostridiales;Incertae Sedis XI;Parvimonas	0	0	12	0	0	0	0	0	0	0	0	0	0	0	0.000565531	0	0	0	0	0	0	0	0	0	0	1	0	0	0	0	1
Bacteria;Firmicutes;Clostridia;Clostridiales;Incertae Sedis XIII;unclassified_Incertae Sedis XIII	1	0	0	0	0	0	0	0	0	0	0	0	0.000322789	0	0	0	0	0	0	0	0	0	0	0	1	0	0	0	0	0	1
Bacteria;Firmicutes;Clostridia;Clostridiales;Lachnospiraceae;Bryantella	0	0	0	0	0	52	0	0	3	0	1	0	0	0	0	0	0	0.00655986	0	0	0.000111123	0	0.0001343	0	0	0	-1	0	1	1	1
Bacteria;Firmicutes;Clostridia;Clostridiales;Lachnospiraceae;Coprococcus	1	0	0	0	0	0	0	0	2	0	0	4	0.000322789	0	0	0	0	0	0	0	7.40823e-05	0	0	0.00059515	1	0	0	0	1	-1	1
Bacteria;Firmicutes;Clostridia;Clostridiales;Lachnospiraceae;Dorea	0	3	0	0	3	0	0	0	2	0	0	0	0	0.000355198	0	0	0.000139854	0	0	0	7.40823e-05	0	0	0	-1	0	1	0	1	0	1
Bacteria;Firmicutes;Clostridia;Clostridiales;Lachnospiraceae;Moryella	0	2	5	0	0	0	1	2	5	1	3	0	0	0.000236798	0.000235638	0	0	0	4.65268e-05	0.000104728	0.000185206	1.05768e-05	0.000402901	0	-1	1	0	-1	1	1	1
Bacteria;Firmicutes;Clostridia;Clostridiales;Lachnospiraceae;Syntrophococcus	0	0	0	0	0	0	0	0	0	0	2	0	0	0	0	0	0	0	0	0	0	0	0.000268601	0	0	0	0	0	0	1	1
Bacteria;Firmicutes;Clostridia;Clostridiales;Peptococcaceae;Peptococcaceae 2;Cryptanaerobacter	0	0	0	0	1	0	0	0	0	0	0	0	0	0	0	0	4.66179e-05	0	0	0	0	0	0	0	0	0	1	0	0	0	1
Bacteria;Firmicutes;Clostridia;Clostridiales;Ruminococcaceae;Ruminococcaceae Incertae Sedis	0	23	2	0	6	0	0	0	0	0	0	0	0	0.00272318	9.42551e-05	0	0.000279707	0	0	0	0	0	0	0	-1	1	1	0	0	0	1
Bacteria;Firmicutes;Clostridia;Clostridiales;Ruminococcaceae;Sporobacter	0	0	0	0	0	0	2	0	0	0	0	0	0	0	0	0	0	0	9.30536e-05	0	0	0	0	0	0	0	0	1	0	0	1
Bacteria;Firmicutes;Clostridia;Clostridiales;Veillonellaceae;Selenomonas	0	0	0	0	0	0	0	0	1	1	0	0	0	0	0	0	0	0	0	0	3.70412e-05	1.05768e-05	0	0	0	0	0	0	1	0	1
Bacteria;Firmicutes;Clostridia;Clostridiales;Veillonellaceae;unclassified_Veillonellaceae	0	0	0	0	0	0	3	0	0	2	11	2	0	0	0	0	0	0	0.00013958	0	0	2.11535e-05	0.0014773	0.000297575	0	0	0	1	-1	1	1
Bacteria;Firmicutes;Clostridia;Thermoanaerobacterales;Thermoanaerobacteraceae;Thermoanaerobacter	0	0	1	0	0	0	0	0	0	0	0	0	0	0	4.71276e-05	0	0	0	0	0	0	0	0	0	0	1	0	0	0	0	1
Bacteria;Firmicutes;Clostridia;Thermoanaerobacterales;Thermodesulfobiaceae;Coprothermobacter	0	0	0	0	0	0	0	0	0	0	1	0	0	0	0	0	0	0	0	0	0	0	0.0001343	0	0	0	0	0	0	1	1
Bacteria;Firmicutes;Erysipelotrichi;Erysipelotrichales;Erysipelotrichaceae;Turicibacter	1	0	0	0	0	0	0	0	0	1	6	0	0.000322789	0	0	0	0	0	0	0	0	1.05768e-05	0.000805802	0	1	0	0	0	-1	1	1
Bacteria;Fusobacteria;Fusobacteria;Fusobacteriales;Fusobacteriaceae;Streptobacillus	0	0	0	0	0	0	0	0	0	0	25	0	0	0	0	0	0	0	0	0	0	0	0.00335751	0	0	0	0	0	0	1	1
Bacteria;Nitrospira;Nitrospira;Nitrospirales;Nitrospiraceae;Leptospirillum	4	0	0	0	0	0	0	0	0	0	0	0	0.00129116	0	0	0	0	0	0	0	0	0	0	0	1	0	0	0	0	0	1
Bacteria;Nitrospira;Nitrospira;Nitrospirales;Nitrospiraceae;Nitrospira	3	0	0	0	0	0	0	0	0	0	0	0	0.000968367	0	0	0	0	0	0	0	0	0	0	0	1	0	0	0	0	0	1
Bacteria;Planctomycetes;Planctomycetacia;Planctomycetales;Planctomycetaceae;Planctomyces	0	0	0	0	0	0	0	0	0	0	1	0	0	0	0	0	0	0	0	0	0	0	0.0001343	0	0	0	0	0	0	1	1
Bacteria;Proteobacteria;Alphaproteobacteria;Rhizobiales;Beijerinckiaceae;Methylocella	0	0	0	0	0	0	0	0	0	0	1	0	0	0	0	0	0	0	0	0	0	0	0.0001343	0	0	0	0	0	0	1	1
Bacteria;Proteobacteria;Alphaproteobacteria;Rhizobiales;unclassified_Rhizobiales	0	0	0	0	1	0	0	0	0	29918	762	0	0	0	0	0	4.66179e-05	0	0	0	0	0.316435	0.102337	0	0	0	1	0	-1	1	1
Bacteria;Proteobacteria;Alphaproteobacteria;Rickettsiales;Rickettsiaceae;Rickettsia	0	0	0	0	1	0	0	0	0	0	0	0	0	0	0	0	4.66179e-05	0	0	0	0	0	0	0	0	0	1	0	0	0	1
Bacteria;Proteobacteria;Alphaproteobacteria;Sphingomonadales;Sphingomonadaceae;Sphingomonas	0	0	0	0	0	0	1	0	0	0	0	0	0	0	0	0	0	0	4.65268e-05	0	0	0	0	0	0	0	0	1	0	0	1
Bacteria;Proteobacteria;Alphaproteobacteria;unclassified_Alphaproteobacteria	0	0	0	0	51	1	0	0	0	1033	22	0	0	0	0	0	0.00237751	0.000126151	0	0	0	0.0109258	0.00295461	0	0	0	1	0	-1	1	1
Bacteria;Proteobacteria;Betaproteobacteria;Burkholderiales;Comamonadaceae;Acidovorax	0	0	0	0	0	0	1	0	2	51	8	0	0	0	0	0	0	0	4.65268e-05	0	7.40823e-05	0.000539414	0.0010744	0	0	0	0	1	-1	1	1
Bacteria;Proteobacteria;Betaproteobacteria;Burkholderiales;Comamonadaceae;Rhodoferax	1	0	0	0	0	0	0	0	0	0	0	0	0.000322789	0	0	0	0	0	0	0	0	0	0	0	1	0	0	0	0	0	1
Bacteria;Proteobacteria;Betaproteobacteria;Burkholderiales;Incertae sedis 5;Aquabacterium	0	0	0	0	0	0	0	0	0	0	2	0	0	0	0	0	0	0	0	0	0	0	0.000268601	0	0	0	0	0	0	1	1
Bacteria;Proteobacteria;Betaproteobacteria;Burkholderiales;Incertae sedis 5;unclassified_Incertae sedis 5	1	0	0	0	0	0	0	0	0	0	0	0	0.000322789	0	0	0	0	0	0	0	0	0	0	0	1	0	0	0	0	0	1
Bacteria;Proteobacteria;Betaproteobacteria;Burkholderiales;unclassified_Burkholderiales	0	0	0	0	0	0	6	0	0	50	9	0	0	0	0	0	0	0	0.000279161	0	0	0.000528838	0.0012087	0	0	0	0	1	-1	1	1
Bacteria;Proteobacteria;Betaproteobacteria;unclassified_Betaproteobacteria	1	0	1	1	0	5	0	0	1	93	11	0	0.000322789	0	4.71276e-05	3.95413e-05	0	0.000630756	0	0	3.70412e-05	0.000983638	0.0014773	0	1	1	-1	0	-1	1	1
Bacteria;Proteobacteria;Deltaproteobacteria;Syntrophobacterales;Syntrophaceae;unclassified_Syntrophaceae	0	0	0	0	0	0	0	0	1	0	0	0	0	0	0	0	0	0	0	0	3.70412e-05	0	0	0	0	0	0	0	1	0	1
Bacteria;Proteobacteria;Gammaproteobacteria;Acidithiobacillales;Acidithiobacillaceae;Acidithiobacillus	11	0	1	0	0	2	0	0	0	0	0	0	0.00355068	0	4.71276e-05	0	0	0.000252302	0	0	0	0	0	0	1	1	-1	0	0	0	1
Bacteria;Proteobacteria;Gammaproteobacteria;Chromatiales;Chromatiaceae;Allochromatium	0	0	0	0	1	0	0	0	0	0	0	0	0	0	0	0	4.66179e-05	0	0	0	0	0	0	0	0	0	1	0	0	0	1
Bacteria;Proteobacteria;Gammaproteobacteria;Enterobacteriales;Enterobacteriaceae;Brenneria	0	0	2	0	1	1	6	3	2	1	0	1	0	0	9.42551e-05	0	4.66179e-05	0.000126151	0.000279161	0.000157093	7.40823e-05	1.05768e-05	0	0.000148787	0	1	-1	1	1	-1	1
Bacteria;Proteobacteria;Gammaproteobacteria;Legionellales;Legionellaceae;Fluoribacter	0	0	0	0	0	0	0	0	2	0	0	0	0	0	0	0	0	0	0	0	7.40823e-05	0	0	0	0	0	0	0	1	0	1
Bacteria;Proteobacteria;Gammaproteobacteria;Legionellales;Legionellaceae;Legionella	0	0	0	0	0	0	0	0	4	1	0	0	0	0	0	0	0	0	0	0	0.000148165	1.05768e-05	0	0	0	0	0	0	1	0	1
Bacteria;Proteobacteria;Gammaproteobacteria;Legionellales;Legionellaceae;Tatlockia	0	0	0	0	0	0	0	0	2	0	0	0	0	0	0	0	0	0	0	0	7.40823e-05	0	0	0	0	0	0	0	1	0	1
Bacteria;Proteobacteria;Gammaproteobacteria;Oceanospirillales;Halomonadaceae;unclassified_Halomonadaceae	0	0	2	4	2	3	5	4	4	1	1	0	0	0	9.42551e-05	0.000158165	9.32357e-05	0.000378453	0.000232634	0.000209457	0.000148165	1.05768e-05	0.0001343	0	0	-1	-1	1	1	1	1
Bacteria;Proteobacteria;Gammaproteobacteria;Pasteurellales;Pasteurellaceae;unclassified_Pasteurellaceae	0	0	1	0	0	0	0	0	0	93	4	0	0	0	4.71276e-05	0	0	0	0	0	0	0.000983638	0.000537201	0	0	1	0	0	-1	1	1
Bacteria;Proteobacteria;Gammaproteobacteria;Pseudomonadales;Incertae sedis 6;Enhydrobacter	0	0	0	0	7	0	0	0	0	0	0	0	0	0	0	0	0.000326325	0	0	0	0	0	0	0	0	0	1	0	0	0	1
Bacteria;Proteobacteria;Gammaproteobacteria;Pseudomonadales;Pseudomonadaceae;Pseudomonas	1	0	0	0	0	0	0	0	0	0	0	0	0.000322789	0	0	0	0	0	0	0	0	0	0	0	1	0	0	0	0	0	1
Bacteria;Proteobacteria;Gammaproteobacteria;Pseudomonadales;unclassified_Pseudomonadales	0	0	0	0	3	0	0	0	0	0	0	0	0	0	0	0	0.000139854	0	0	0	0	0	0	0	0	0	1	0	0	0	1
Bacteria;Proteobacteria;Gammaproteobacteria;Vibrionales;Vibrionaceae;Photobacterium	0	0	1	0	0	0	0	1	3	0	0	0	0	0	4.71276e-05	0	0	0	0	5.23642e-05	0.000111123	0	0	0	0	1	0	-1	1	0	1
Bacteria;Proteobacteria;Gammaproteobacteria;Xanthomonadales;Xanthomonadaceae;Pseudoxanthomonas	3	0	0	0	0	0	0	0	0	0	0	0	0.000968367	0	0	0	0	0	0	0	0	0	0	0	1	0	0	0	0	0	1
Bacteria;Proteobacteria;Gammaproteobacteria;Xanthomonadales;Xanthomonadaceae;Stenotrophomonas	87	0	0	0	0	0	0	0	0	41	28	0	0.0280826	0	0	0	0	0	0	0	0	0.000433647	0.00376041	0	1	0	0	0	-1	1	1
Bacteria;Proteobacteria;Gammaproteobacteria;Xanthomonadales;Xanthomonadaceae;unclassified_Xanthomonadaceae	17	0	0	0	0	0	0	0	0	15	5	0	0.00548741	0	0	0	0	0	0	0	0	0.000158651	0.000671501	0	1	0	0	0	-1	1	1
Bacteria;Proteobacteria;unclassified_Proteobacteria	0	0	7	8	108	1	5	4	2	36	2	2	0	0	0.000329893	0.000316331	0.00503473	0.000126151	0.000232634	0.000209457	7.40823e-05	0.000380763	0.000268601	0.000297575	0	1	1	1	-1	-1	1
Bacteria;Acidobacteria;Acidobacteria;Acidobacteriales;Acidobacteriaceae;Gp1	0	0	0	0	0	0	0	0	0	370	9	0	0	0	0	0	0	0	0	0	0	0.0039134	0.0012087	0	0	0	0	0	-1	1	0
Bacteria;Acidobacteria;Acidobacteria;Acidobacteriales;Acidobacteriaceae;Gp4	0	0	0	0	0	0	0	0	0	2	1	0	0	0	0	0	0	0	0	0	0	2.11535e-05	0.0001343	0	0	0	0	0	-1	1	0
Bacteria;Actinobacteria;Actinobacteria;Actinobacteridae;Actinomycetales;Corynebacterineae;Corynebacteriaceae;Corynebacterium	0	0	0	0	32	0	0	0	1	4	0	0	0	0	0	0	0.00149177	0	0	0	3.70412e-05	4.2307e-05	0	0	0	0	1	0	-1	0	0
Bacteria;Actinobacteria;Actinobacteria;Actinobacteridae;Actinomycetales;Micrococcineae;Micrococcaceae;Rothia	0	0	6	0	0	32	0	0	0	7	5	0	0	0	0.000282765	0	0	0.00403684	0	0	0	7.40373e-05	0.000671501	0	0	1	-1	0	-1	1	0
Bacteria;Actinobacteria;Actinobacteria;Coriobacteridae;Coriobacteriales;Coriobacterineae;Coriobacteriaceae;Eggerthella	0	44	0	0	0	0	17	0	1	0	0	1	0	0.00520957	0	0	0	0	0.000790955	0	3.70412e-05	0	0	0.000148787	-1	0	0	1	1	-1	0
Bacteria;Bacteroidetes;Bacteroidetes;Bacteroidales;Porphyromonadaceae;unclassified_Porphyromonadaceae	5	89	5	1	0	2	1	0	0	869	880	10	0.00161394	0.0105375	0.000235638	3.95413e-05	0	0.000252302	4.65268e-05	0	0	0.0091912	0.118184	0.00148787	-1	1	-1	1	-1	1	0
Bacteria;Bacteroidetes;Bacteroidetes;Bacteroidales;Prevotellaceae;Hallella	0	1	0	0	0	0	0	0	0	0	8	0	0	0.000118399	0	0	0	0	0	0	0	0	0.0010744	0	-1	0	0	0	0	1	0
Bacteria;Bacteroidetes;Bacteroidetes;Bacteroidales;Rikenellaceae;Rikenella	0	0	0	0	0	0	0	0	0	3	13	0	0	0	0	0	0	0	0	0	0	3.17303e-05	0.0017459	0	0	0	0	0	-1	1	0
Bacteria;Firmicutes;Bacilli;Bacillales;Staphylococcaceae;Staphylococcus	0	0	0	0	43	6	0	0	0	6	0	0	0	0	0	0	0.00200457	0.000756907	0	0	0	6.34605e-05	0	0	0	0	1	0	-1	0	0
Bacteria;Firmicutes;Bacilli;Lactobacillales;Streptococcaceae;Streptococcus	0	1	26	0	192	574	123	15	137	90	28	100	0	0.000118399	0.00122532	0	0.00895063	0.0724107	0.00572279	0.000785464	0.00507464	0.000951908	0.00376041	0.0148787	-1	1	-1	1	1	-1	0
Bacteria;Firmicutes;Bacilli;Lactobacillales;Streptococcaceae;unclassified_Streptococcaceae	0	0	0	0	3	9	9	0	0	0	0	0	0	0	0	0	0.000139854	0.00113536	0.000418741	0	0	0	0	0	0	0	-1	1	0	0	0
Bacteria;Firmicutes;Clostridia;Clostridiales;Clostridiaceae;Clostridiaceae 1;unclassified_Clostridiaceae 1	11	9	2	1	2	1	10	0	0	1	0	1	0.00355068	0.00106559	9.42551e-05	3.95413e-05	9.32357e-05	0.000126151	0.000465268	0	0	1.05768e-05	0	0.000148787	1	1	-1	1	-1	-1	0
Bacteria;Firmicutes;Clostridia;Clostridiales;Incertae Sedis XI;Sedimentibacter	1	0	0	0	0	0	0	0	0	1	0	0	0.000322789	0	0	0	0	0	0	0	0	1.05768e-05	0	0	1	0	0	0	-1	0	0
Bacteria;Firmicutes;Clostridia;Clostridiales;Lachnospiraceae;Lachnospiraceae Incertae Sedis	74	92	12	13	8	11	12	29	843	46	58	191	0.0238864	0.0108927	0.000565531	0.000514037	0.000372943	0.00138766	0.000558321	0.00151856	0.0312257	0.000486531	0.00778942	0.0284184	1	1	-1	-1	1	-1	0
Bacteria;Firmicutes;Clostridia;Clostridiales;Lachnospiraceae;unclassified_Lachnospiraceae	11	49	10	5	9	14	7	25	44	19	2499	61	0.00355068	0.00580156	0.000471276	0.000197707	0.000419561	0.00176612	0.000325687	0.00130911	0.00162981	0.000200958	0.335616	0.00907603	-1	1	-1	-1	1	1	0
Bacteria;Firmicutes;Clostridia;Clostridiales;Peptostreptococcaceae;Peptostreptococcaceae Incertae Sedis	0	1	0	0	0	0	0	0	1	0	0	0	0	0.000118399	0	0	0	0	0	0	3.70412e-05	0	0	0	-1	0	0	0	1	0	0
Bacteria;Firmicutes;Clostridia;Clostridiales;Ruminococcaceae;Faecalibacterium	29	31	163	240	719	142	32	82	218	323	56	712	0.00936088	0.00367038	0.00768179	0.00948992	0.0335183	0.0179135	0.00148886	0.00429387	0.00807497	0.00341629	0.00752082	0.105937	1	-1	1	-1	1	-1	0
Bacteria;Firmicutes;Clostridia;Clostridiales;Ruminococcaceae;Ruminococcus	0	0	1	1	0	3	2	0	0	0	0	1	0	0	4.71276e-05	3.95413e-05	0	0.000378453	9.30536e-05	0	0	0	0	0.000148787	0	1	-1	1	0	-1	0
Bacteria;Firmicutes;Clostridia;Clostridiales;Veillonellaceae;Dialister	0	0	108	0	0	22	15	0	0	19	0	0	0	0	0.00508978	0	0	0.00277532	0.000697902	0	0	0.000200958	0	0	0	1	-1	1	-1	0	0
Bacteria;Firmicutes;Clostridia;Thermoanaerobacterales;Incertae Sedis III;unclassified_Incertae Sedis III	0	1	0	0	0	0	0	0	0	0	1	0	0	0.000118399	0	0	0	0	0	0	0	0	0.0001343	0	-1	0	0	0	0	1	0
Bacteria;Firmicutes;Clostridia;unclassified_Clostridia	61	1815	135	0	781	5	1	0	0	3	0	4	0.0196901	0.214895	0.00636222	0	0.0364086	0.000630756	4.65268e-05	0	0	3.17303e-05	0	0.00059515	-1	1	1	1	-1	-1	0
Bacteria;Proteobacteria;Alphaproteobacteria;Caulobacterales;Caulobacteraceae;Caulobacter	0	0	0	0	0	0	0	0	0	370	10	0	0	0	0	0	0	0	0	0	0	0.0039134	0.001343	0	0	0	0	0	-1	1	0
Bacteria;Proteobacteria;Alphaproteobacteria;Rhizobiales;Beijerinckiaceae;unclassified_Beijerinckiaceae	0	0	0	0	0	0	0	0	0	8	4	0	0	0	0	0	0	0	0	0	0	8.4614e-05	0.000537201	0	0	0	0	0	-1	1	0
Bacteria;Proteobacteria;Alphaproteobacteria;Rhizobiales;Bradyrhizobiaceae;Afipia	0	0	0	0	0	0	0	0	0	2	1	0	0	0	0	0	0	0	0	0	0	2.11535e-05	0.0001343	0	0	0	0	0	-1	1	0
Bacteria;Proteobacteria;Alphaproteobacteria;Rhizobiales;Bradyrhizobiaceae;Bradyrhizobium	0	0	0	0	0	0	0	0	0	372	9	0	0	0	0	0	0	0	0	0	0	0.00393455	0.0012087	0	0	0	0	0	-1	1	0
Bacteria;Proteobacteria;Alphaproteobacteria;Rhizobiales;Bradyrhizobiaceae;unclassified_Bradyrhizobiaceae	0	0	0	0	0	0	0	0	0	380	9	0	0	0	0	0	0	0	0	0	0	0.00401917	0.0012087	0	0	0	0	0	-1	1	0
Bacteria;Proteobacteria;Alphaproteobacteria;Rhizobiales;Brucellaceae;Ochrobactrum	0	0	0	0	0	0	0	0	0	1303	25	0	0	0	0	0	0	0	0	0	0	0.0137815	0.00335751	0	0	0	0	0	-1	1	0
Bacteria;Proteobacteria;Alphaproteobacteria;Rhizobiales;Brucellaceae;unclassified_Brucellaceae	0	0	0	0	0	0	0	0	0	480	13	0	0	0	0	0	0	0	0	0	0	0.00507684	0.0017459	0	0	0	0	0	-1	1	0
Bacteria;Proteobacteria;Alphaproteobacteria;Rhizobiales;Hyphomicrobiaceae;Rhodoplanes	0	0	0	0	0	0	0	0	0	29391	713	0	0	0	0	0	0	0	0	0	0	0.310861	0.0957561	0	0	0	0	0	-1	1	0
Bacteria;Proteobacteria;Alphaproteobacteria;Rhizobiales;Hyphomicrobiaceae;unclassified_Hyphomicrobiaceae	0	0	0	0	0	0	0	0	0	2281	54	0	0	0	0	0	0	0	0	0	0	0.0241256	0.00725222	0	0	0	0	0	-1	1	0
Bacteria;Proteobacteria;Alphaproteobacteria;Rhizobiales;Phyllobacteriaceae;Aminobacter	0	0	0	0	0	0	0	0	0	71	1	0	0	0	0	0	0	0	0	0	0	0.000750949	0.0001343	0	0	0	0	0	-1	1	0
Bacteria;Proteobacteria;Alphaproteobacteria;Rhizobiales;Phyllobacteriaceae;Mesorhizobium	0	0	0	0	0	0	0	0	0	1982	43	0	0	0	0	0	0	0	0	0	0	0.0209631	0.00577491	0	0	0	0	0	-1	1	0
Bacteria;Proteobacteria;Alphaproteobacteria;Rhizobiales;Phyllobacteriaceae;Phyllobacterium	0	0	0	0	0	0	0	0	0	161	1	0	0	0	0	0	0	0	0	0	0	0.00170286	0.0001343	0	0	0	0	0	-1	1	0
Bacteria;Proteobacteria;Alphaproteobacteria;Rhizobiales;Phyllobacteriaceae;unclassified_Phyllobacteriaceae	0	0	0	0	0	0	0	0	0	914	46	0	0	0	0	0	0	0	0	0	0	0.00966715	0.00617781	0	0	0	0	0	-1	1	0
Bacteria;Proteobacteria;Alphaproteobacteria;Rhizobiales;Rhizobiaceae;Agrobacterium	0	0	0	0	0	0	0	0	0	10	2	0	0	0	0	0	0	0	0	0	0	0.000105768	0.000268601	0	0	0	0	0	-1	1	0
Bacteria;Proteobacteria;Alphaproteobacteria;Rhizobiales;Rhizobiaceae;Ensifer	0	0	0	0	0	0	0	0	0	1203	22	0	0	0	0	0	0	0	0	0	0	0.0127238	0.00295461	0	0	0	0	0	-1	1	0
Bacteria;Proteobacteria;Alphaproteobacteria;Rhizobiales;Rhizobiaceae;Rhizobium	0	0	0	0	0	0	0	0	0	2291	28	0	0	0	0	0	0	0	0	0	0	0.0242313	0.00376041	0	0	0	0	0	-1	1	0
Bacteria;Proteobacteria;Alphaproteobacteria;Rhizobiales;Rhizobiaceae;unclassified_Rhizobiaceae	0	0	0	0	0	0	0	0	0	358	6	0	0	0	0	0	0	0	0	0	0	0.00378648	0.000805802	0	0	0	0	0	-1	1	0
Bacteria;Proteobacteria;Betaproteobacteria;Burkholderiales;Alcaligenaceae;Sutterella	71	2	0	0	0	0	0	0	0	2	0	0	0.022918	0.000236798	0	0	0	0	0	0	0	2.11535e-05	0	0	1	0	0	0	-1	0	0
Bacteria;Proteobacteria;Betaproteobacteria;Burkholderiales;Incertae sedis 5;Thiobacter	0	0	0	0	0	0	0	0	0	371	9	0	0	0	0	0	0	0	0	0	0	0.00392397	0.0012087	0	0	0	0	0	-1	1	0
Bacteria;Proteobacteria;Betaproteobacteria;Burkholderiales;Oxalobacteraceae;unclassified_Oxalobacteraceae	11	0	0	0	0	0	0	0	0	1	0	0	0.00355068	0	0	0	0	0	0	0	0	1.05768e-05	0	0	1	0	0	0	-1	0	0
Bacteria;Proteobacteria;Deltaproteobacteria;Syntrophobacterales;Syntrophaceae;Desulfomonile	0	0	0	0	0	0	0	0	0	2	1	0	0	0	0	0	0	0	0	0	0	2.11535e-05	0.0001343	0	0	0	0	0	-1	1	0
Bacteria;Proteobacteria;Gammaproteobacteria;Enterobacteriales;Enterobacteriaceae;Erwinia	10	5	456	731	388	123	592	596	746	236	10	138	0.00322789	0.000591996	0.0214902	0.0289047	0.0180877	0.0155166	0.0275439	0.0312091	0.0276327	0.00249611	0.001343	0.0205327	1	-1	1	-1	1	-1	0
Bacteria;Proteobacteria;Gammaproteobacteria;Enterobacteriales;Enterobacteriaceae;Klebsiella	46	17	1195	1740	1358	455	1092	1415	1776	667	43	239	0.0148483	0.00201279	0.0563175	0.0688019	0.0633071	0.0573988	0.0508072	0.0740954	0.0657851	0.00705469	0.00577491	0.0355602	1	-1	1	-1	1	-1	0
Bacteria;Proteobacteria;Gammaproteobacteria;Enterobacteriales;Enterobacteriaceae;Pantoea	0	2	208	242	190	62	63	250	266	104	1	20	0	0.000236798	0.00980254	0.009569	0.0088574	0.00782137	0.00293119	0.0130911	0.00985295	0.00109998	0.0001343	0.00297575	-1	1	1	-1	1	-1	0
Bacteria;Proteobacteria;Gammaproteobacteria;Enterobacteriales;Enterobacteriaceae;Pectobacterium	0	2	54	77	112	16	45	25	49	70	0	10	0	0.000236798	0.00254489	0.00304468	0.0052212	0.00201842	0.0020937	0.00130911	0.00181502	0.000740373	0	0.00148787	-1	-1	1	1	1	-1	0
Bacteria;Proteobacteria;Gammaproteobacteria;Enterobacteriales;Enterobacteriaceae;Serratia	0	0	4	5	0	1	4	3	3	0	0	0	0	0	0.00018851	0.000197707	0	0.000126151	0.000186107	0.000157093	0.000111123	0	0	0	0	-1	-1	1	1	0	0
Bacteria;Proteobacteria;Gammaproteobacteria;Enterobacteriales;Enterobacteriaceae;Xenorhabdus	0	0	1	1	0	0	4	0	2	11	0	1	0	0	4.71276e-05	3.95413e-05	0	0	0.000186107	0	7.40823e-05	0.000116344	0	0.000148787	0	1	0	1	-1	-1	0
Bacteria;Proteobacteria;Gammaproteobacteria;Enterobacteriales;Enterobacteriaceae;unclassified_Enterobacteriaceae	333	119	11663	14792	11299	3853	11087	11645	15602	6157	323	2282	0.107489	0.0140895	0.549649	0.584895	0.526735	0.48606	0.515842	0.609782	0.577916	0.0651211	0.043379	0.339533	1	-1	1	-1	1	-1	0
Bacteria;Proteobacteria;Gammaproteobacteria;Oceanospirillales;Alcanivoraceae;Alcanivorax	0	0	0	0	0	0	0	0	0	35	3	0	0	0	0	0	0	0	0	0	0	0.000370186	0.000402901	0	0	0	0	0	-1	1	0
Bacteria;Proteobacteria;Gammaproteobacteria;Pasteurellales;Pasteurellaceae;Aggregatibacter	0	0	0	0	0	0	0	0	0	47	4	0	0	0	0	0	0	0	0	0	0	0.000497107	0.000537201	0	0	0	0	0	-1	1	0
Bacteria;Proteobacteria;Gammaproteobacteria;Pasteurellales;Pasteurellaceae;Haemophilus	0	0	0	0	0	0	0	0	0	40	2	0	0	0	0	0	0	0	0	0	0	0.00042307	0.000268601	0	0	0	0	0	-1	1	0
Bacteria;Proteobacteria;Gammaproteobacteria;Vibrionales;Vibrionaceae;Vibrio	0	0	5	0	3	13	0	18	1	0	0	0	0	0	0.000235638	0	0.000139854	0.00163996	0	0.000942556	3.70412e-05	0	0	0	0	1	-1	-1	1	0	0
Bacteria;Proteobacteria;Gammaproteobacteria;Xanthomonadales;Xanthomonadaceae;Lysobacter	14	0	0	0	0	0	0	0	0	4	0	0	0.00451904	0	0	0	0	0	0	0	0	4.2307e-05	0	0	1	0	0	0	-1	0	0
Bacteria;Proteobacteria;Gammaproteobacteria;unclassified_Gammaproteobacteria	6	0	26	31	46	15	27	43	41	49	0	3	0.00193673	0	0.00122532	0.00122578	0.00214442	0.00189227	0.00125622	0.00225166	0.00151869	0.000518261	0	0.000446362	1	-1	1	-1	1	-1	0
Bacteria;Verrucomicrobia;Verrucomicrobiae;Verrucomicrobiales;Xiphinematobacteriaceae;Xiphinematobacteriaceae_genera_incertae_sedis	0	0	0	0	0	0	0	0	0	744	18	0	0	0	0	0	0	0	0	0	0	0.0078691	0.00241741	0	0	0	0	0	-1	1	0
Bacteria;Acidobacteria;Acidobacteria;Acidobacteriales;Acidobacteriaceae;Gp2	0	0	0	0	0	0	0	0	0	2	0	0	0	0	0	0	0	0	0	0	0	2.11535e-05	0	0	0	0	0	0	-1	0	-1
Bacteria;Acidobacteria;Acidobacteria;Acidobacteriales;Acidobacteriaceae;Gp9	1	5	0	0	0	1	1	0	0	0	0	0	0.000322789	0.000591996	0	0	0	0.000126151	4.65268e-05	0	0	0	0	0	-1	0	-1	1	0	0	-1
Bacteria;Actinobacteria;Actinobacteria;Actinobacteridae;Actinomycetales;Corynebacterineae;Gordoniaceae;unclassified_Gordoniaceae	0	0	0	0	0	0	0	0	0	2	0	0	0	0	0	0	0	0	0	0	0	2.11535e-05	0	0	0	0	0	0	-1	0	-1
Bacteria;Actinobacteria;Actinobacteria;Actinobacteridae;Actinomycetales;Frankineae;unclassified_Frankineae	0	0	0	0	0	0	0	0	0	0	0	1	0	0	0	0	0	0	0	0	0	0	0	0.000148787	0	0	0	0	0	-1	-1
Bacteria;Actinobacteria;Actinobacteria;unclassified_Actinobacteria	9	1	0	0	0	1	0	0	0	1	0	0	0.0029051	0.000118399	0	0	0	0.000126151	0	0	0	1.05768e-05	0	0	1	0	-1	0	-1	0	-1
Bacteria;Aquificae;Aquificae;Aquificales;Incertae sedis 2;Thermovibrio	0	0	0	0	0	0	0	0	0	29	0	0	0	0	0	0	0	0	0	0	0	0.000306726	0	0	0	0	0	0	-1	0	-1
Bacteria;Bacteroidetes;Bacteroidetes;Bacteroidales;Porphyromonadaceae;Dysgonomonas	0	1	0	0	0	0	0	0	0	0	0	0	0	0.000118399	0	0	0	0	0	0	0	0	0	0	-1	0	0	0	0	0	-1
Bacteria;Bacteroidetes;Bacteroidetes;Bacteroidales;Porphyromonadaceae;Porphyromonas	0	0	0	0	0	4	0	0	0	0	0	0	0	0	0	0	0	0.000504605	0	0	0	0	0	0	0	0	-1	0	0	0	-1
Bacteria;Bacteroidetes;Bacteroidetes;Bacteroidales;Porphyromonadaceae;Tannerella	0	4	0	0	0	0	0	0	0	57	36	0	0	0.000473597	0	0	0	0	0	0	0	0.000602875	0.00483481	0	-1	0	0	0	-1	1	-1
Bacteria;Bacteroidetes;Bacteroidetes;Bacteroidales;Prevotellaceae;Prevotella	0	3	2	0	0	2	0	0	0	2	25	0	0	0.000355198	9.42551e-05	0	0	0.000252302	0	0	0	2.11535e-05	0.00335751	0	-1	1	-1	0	-1	1	-1
Bacteria;Bacteroidetes;Bacteroidetes;Bacteroidales;Prevotellaceae;unclassified_Prevotellaceae	0	4	1	0	1	1	0	0	0	18	105	0	0	0.000473597	4.71276e-05	0	4.66179e-05	0.000126151	0	0	0	0.000190382	0.0141015	0	-1	1	-1	0	-1	1	-1
Bacteria;Bacteroidetes;Bacteroidetes;Bacteroidales;Rikenellaceae;Alistipes	4	48	0	0	0	0	0	0	0	57	3	0	0.00129116	0.00568316	0	0	0	0	0	0	0	0.000602875	0.000402901	0	-1	0	0	0	-1	1	-1
Bacteria;Bacteroidetes;Flavobacteria;Flavobacteriales;Flavobacteriaceae;Capnocytophaga	0	0	0	0	0	0	0	0	0	271	0	0	0	0	0	0	0	0	0	0	0	0.0028663	0	0	0	0	0	0	-1	0	-1
Bacteria;Bacteroidetes;Sphingobacteria;Sphingobacteriales;Crenotrichaceae;Terrimonas	0	1	0	0	0	0	0	0	0	0	0	0	0	0.000118399	0	0	0	0	0	0	0	0	0	0	-1	0	0	0	0	0	-1
Bacteria;Bacteroidetes;Sphingobacteria;Sphingobacteriales;Sphingobacteriaceae;unclassified_Sphingobacteriaceae	0	0	0	0	0	0	0	0	0	1	0	0	0	0	0	0	0	0	0	0	0	1.05768e-05	0	0	0	0	0	0	-1	0	-1
Bacteria;Bacteroidetes;Sphingobacteria;Sphingobacteriales;unclassified_Sphingobacteriales	0	2	0	0	0	0	0	0	0	1484	36	0	0	0.000236798	0	0	0	0	0	0	0	0.0156959	0.00483481	0	-1	0	0	0	-1	1	-1
Bacteria;Bacteroidetes;unclassified_Bacteroidetes	0	2	0	0	0	0	0	0	0	0	0	0	0	0.000236798	0	0	0	0	0	0	0	0	0	0	-1	0	0	0	0	0	-1
Bacteria;Deinococcus-Thermus;Deinococci;Deinococcales;Trueperaceae;Truepera	0	0	0	0	0	0	0	0	0	2	0	0	0	0	0	0	0	0	0	0	0	2.11535e-05	0	0	0	0	0	0	-1	0	-1
Bacteria;Firmicutes;Bacilli;Lactobacillales;unclassified_Lactobacillales	0	0	0	0	0	1	0	0	0	0	0	0	0	0	0	0	0	0.000126151	0	0	0	0	0	0	0	0	-1	0	0	0	-1
Bacteria;Firmicutes;Clostridia;Clostridiales;Eubacteriaceae;Garciella	0	0	0	0	0	0	0	0	0	0	0	1	0	0	0	0	0	0	0	0	0	0	0	0.000148787	0	0	0	0	0	-1	-1
Bacteria;Firmicutes;Clostridia;Clostridiales;Incertae Sedis XIII;Mogibacterium	0	0	1	0	0	47	0	0	0	3	0	0	0	0	4.71276e-05	0	0	0.0059291	0	0	0	3.17303e-05	0	0	0	1	-1	0	-1	0	-1
Bacteria;Firmicutes;Clostridia;Clostridiales;Incertae Sedis XV;Anaerobaculum	0	1	0	0	0	0	0	0	0	0	0	0	0	0.000118399	0	0	0	0	0	0	0	0	0	0	-1	0	0	0	0	0	-1
Bacteria;Firmicutes;Clostridia;Clostridiales;Lachnospiraceae;Butyrivibrio	0	0	0	0	0	0	0	0	0	0	0	8	0	0	0	0	0	0	0	0	0	0	0	0.0011903	0	0	0	0	0	-1	-1
Bacteria;Firmicutes;Clostridia;Clostridiales;Peptococcaceae;Peptococcaceae 2;Pelotomaculum	1	0	0	0	1	2	0	0	0	0	0	2	0.000322789	0	0	0	4.66179e-05	0.000252302	0	0	0	0	0	0.000297575	1	0	-1	0	0	-1	-1
Bacteria;Firmicutes;Clostridia;Clostridiales;Peptococcaceae;unclassified_Peptococcaceae	0	1	0	0	0	0	0	0	0	0	0	0	0	0.000118399	0	0	0	0	0	0	0	0	0	0	-1	0	0	0	0	0	-1
Bacteria;Firmicutes;Clostridia;Clostridiales;Ruminococcaceae;Acetanaerobacterium	0	1	0	0	0	0	0	0	0	0	0	0	0	0.000118399	0	0	0	0	0	0	0	0	0	0	-1	0	0	0	0	0	-1
Bacteria;Firmicutes;Clostridia;Clostridiales;Ruminococcaceae;Papillibacter	0	3	0	0	0	1	6	0	0	8	4	2	0	0.000355198	0	0	0	0.000126151	0.000279161	0	0	8.4614e-05	0.000537201	0.000297575	-1	0	-1	1	-1	1	-1
Bacteria;Firmicutes;Clostridia;Clostridiales;Ruminococcaceae;Subdoligranulum	0	239	0	0	0	14	531	186	491	27	4	4	0	0.0282974	0	0	0	0.00176612	0.0247057	0.00973975	0.0181872	0.000285572	0.000537201	0.00059515	-1	0	-1	1	1	-1	-1
Bacteria;Fusobacteria;Fusobacteria;Fusobacteriales;Fusobacteriaceae;Leptotrichia	0	0	0	0	0	3	0	0	0	0	0	0	0	0	0	0	0	0.000378453	0	0	0	0	0	0	0	0	-1	0	0	0	-1
Bacteria;OP10;OP10_genera_incertae_sedis	0	0	0	0	0	0	0	0	0	0	0	1	0	0	0	0	0	0	0	0	0	0	0	0.000148787	0	0	0	0	0	-1	-1
Bacteria;Proteobacteria;Alphaproteobacteria;Parvularculales;Parvularculaceae;Parvularcula	0	0	0	0	0	0	0	0	0	2	0	0	0	0	0	0	0	0	0	0	0	2.11535e-05	0	0	0	0	0	0	-1	0	-1
Bacteria;Proteobacteria;Alphaproteobacteria;Rhizobiales;Aurantimonadaceae;Aurantimonas	0	0	0	0	0	0	0	0	0	4	0	0	0	0	0	0	0	0	0	0	0	4.2307e-05	0	0	0	0	0	0	-1	0	-1
Bacteria;Proteobacteria;Alphaproteobacteria;Rhizobiales;Aurantimonadaceae;unclassified_Aurantimonadaceae	0	0	0	0	0	0	0	0	0	3	0	0	0	0	0	0	0	0	0	0	0	3.17303e-05	0	0	0	0	0	0	-1	0	-1
Bacteria;Proteobacteria;Alphaproteobacteria;Rhizobiales;Brucellaceae;Brucella	0	0	0	0	0	0	0	0	0	470	0	0	0	0	0	0	0	0	0	0	0	0.00497107	0	0	0	0	0	0	-1	0	-1
Bacteria;Proteobacteria;Alphaproteobacteria;Rhizobiales;Hyphomicrobiaceae;Ancalomicrobium	0	0	0	0	0	0	0	0	0	2	0	0	0	0	0	0	0	0	0	0	0	2.11535e-05	0	0	0	0	0	0	-1	0	-1
Bacteria;Proteobacteria;Alphaproteobacteria;Rhizobiales;Hyphomicrobiaceae;Ancylobacter	0	0	0	0	0	0	0	0	0	4	0	0	0	0	0	0	0	0	0	0	0	4.2307e-05	0	0	0	0	0	0	-1	0	-1
Bacteria;Proteobacteria;Alphaproteobacteria;Rhizobiales;Hyphomicrobiaceae;Blastochloris	0	0	0	0	0	0	0	0	0	36	0	0	0	0	0	0	0	0	0	0	0	0.000380763	0	0	0	0	0	0	-1	0	-1
Bacteria;Proteobacteria;Alphaproteobacteria;Rhizobiales;Hyphomicrobiaceae;Devosia	0	0	0	0	0	0	0	0	0	8	0	0	0	0	0	0	0	0	0	0	0	8.4614e-05	0	0	0	0	0	0	-1	0	-1
Bacteria;Proteobacteria;Alphaproteobacteria;Rhizobiales;Hyphomicrobiaceae;Hyphomicrobium	0	0	0	0	0	0	0	0	0	54	0	0	0	0	0	0	0	0	0	0	0	0.000571145	0	0	0	0	0	0	-1	0	-1
Bacteria;Proteobacteria;Alphaproteobacteria;Rhizobiales;Hyphomicrobiaceae;Labrys	0	0	0	0	0	0	0	0	0	4	0	0	0	0	0	0	0	0	0	0	0	4.2307e-05	0	0	0	0	0	0	-1	0	-1
Bacteria;Proteobacteria;Alphaproteobacteria;Rhizobiales;Methylocystaceae;Methylopila	0	0	0	0	0	0	0	0	0	30	0	0	0	0	0	0	0	0	0	0	0	0.000317303	0	0	0	0	0	0	-1	0	-1
Bacteria;Proteobacteria;Alphaproteobacteria;Rhizobiales;Methylocystaceae;unclassified_Methylocystaceae	0	0	0	0	0	0	0	0	0	1	0	0	0	0	0	0	0	0	0	0	0	1.05768e-05	0	0	0	0	0	0	-1	0	-1
Bacteria;Proteobacteria;Alphaproteobacteria;Rhizobiales;Phyllobacteriaceae;Aquamicrobium	0	0	0	0	0	0	0	0	0	13	0	0	0	0	0	0	0	0	0	0	0	0.000137498	0	0	0	0	0	0	-1	0	-1
Bacteria;Proteobacteria;Alphaproteobacteria;Rhizobiales;Phyllobacteriaceae;Defluvibacter	0	0	0	0	0	0	0	0	0	17	0	0	0	0	0	0	0	0	0	0	0	0.000179805	0	0	0	0	0	0	-1	0	-1
Bacteria;Proteobacteria;Alphaproteobacteria;Rhizobiales;Phyllobacteriaceae;Hoeflea	0	0	0	0	0	0	0	0	0	11	0	0	0	0	0	0	0	0	0	0	0	0.000116344	0	0	0	0	0	0	-1	0	-1
Bacteria;Proteobacteria;Alphaproteobacteria;Rhizobiales;Phyllobacteriaceae;Pseudaminobacter	0	0	0	0	0	0	0	0	0	9	0	0	0	0	0	0	0	0	0	0	0	9.51908e-05	0	0	0	0	0	0	-1	0	-1
Bacteria;Proteobacteria;Alphaproteobacteria;Rhizobiales;Rhizobiaceae;Sinorhizobium	0	0	0	0	0	0	0	0	0	16	0	0	0	0	0	0	0	0	0	0	0	0.000169228	0	0	0	0	0	0	-1	0	-1
Bacteria;Proteobacteria;Alphaproteobacteria;Rhodobacterales;Rhodobacteraceae;Paracoccus	0	0	0	0	0	0	0	0	0	2	0	0	0	0	0	0	0	0	0	0	0	2.11535e-05	0	0	0	0	0	0	-1	0	-1
Bacteria;Proteobacteria;Alphaproteobacteria;Rhodobacterales;Rhodobacteraceae;Rhodobacter	0	0	0	0	0	0	0	0	0	32	0	0	0	0	0	0	0	0	0	0	0	0.000338456	0	0	0	0	0	0	-1	0	-1
Bacteria;Proteobacteria;Alphaproteobacteria;Rhodobacterales;Rhodobacteraceae;unclassified_Rhodobacteraceae	0	0	0	0	0	0	0	0	0	18	0	0	0	0	0	0	0	0	0	0	0	0.000190382	0	0	0	0	0	0	-1	0	-1
Bacteria;Proteobacteria;Alphaproteobacteria;Rickettsiales;Rickettsiaceae;Orientia	0	0	0	0	0	0	0	0	0	4	0	0	0	0	0	0	0	0	0	0	0	4.2307e-05	0	0	0	0	0	0	-1	0	-1
Bacteria;Proteobacteria;Alphaproteobacteria;Sphingomonadales;Sphingomonadaceae;Erythrobacter	0	0	0	0	0	1	0	0	0	0	0	0	0	0	0	0	0	0.000126151	0	0	0	0	0	0	0	0	-1	0	0	0	-1
Bacteria;Proteobacteria;Betaproteobacteria;Burkholderiales;Burkholderiaceae;Cupriavidus	0	0	0	0	0	6	0	0	0	0	0	0	0	0	0	0	0	0.000756907	0	0	0	0	0	0	0	0	-1	0	0	0	-1
Bacteria;Proteobacteria;Betaproteobacteria;Burkholderiales;Burkholderiaceae;unclassified_Burkholderiaceae	0	0	0	0	0	0	0	0	0	2	0	0	0	0	0	0	0	0	0	0	0	2.11535e-05	0	0	0	0	0	0	-1	0	-1
Bacteria;Proteobacteria;Betaproteobacteria;Burkholderiales;Comamonadaceae;Brachymonas	2	1	0	0	0	1	0	0	0	1	0	0	0.000645578	0.000118399	0	0	0	0.000126151	0	0	0	1.05768e-05	0	0	1	0	-1	0	-1	0	-1
Bacteria;Proteobacteria;Betaproteobacteria;Burkholderiales;Comamonadaceae;Polaromonas	0	0	0	0	0	1	0	0	0	0	0	0	0	0	0	0	0	0.000126151	0	0	0	0	0	0	0	0	-1	0	0	0	-1
Bacteria;Proteobacteria;Betaproteobacteria;Neisseriales;Neisseriaceae;Neisseria	1	0	0	0	2	6	0	0	0	1	0	0	0.000322789	0	0	0	9.32357e-05	0.000756907	0	0	0	1.05768e-05	0	0	1	0	-1	0	-1	0	-1
Bacteria;Proteobacteria;Deltaproteobacteria;Desulfovibrionales;Desulfomicrobiaceae;Desulfomicrobium	0	0	0	0	0	0	0	0	0	2	0	0	0	0	0	0	0	0	0	0	0	2.11535e-05	0	0	0	0	0	0	-1	0	-1
Bacteria;Proteobacteria;Deltaproteobacteria;Desulfuromonales;Geobacteraceae;Geobacter	0	0	0	1	0	0	0	0	0	0	0	0	0	0	0	3.95413e-05	0	0	0	0	0	0	0	0	0	-1	0	0	0	0	-1
Bacteria;Proteobacteria;Deltaproteobacteria;Syntrophobacterales;Syntrophobacteraceae;Syntrophobacter	0	0	0	0	0	0	0	0	0	2	0	0	0	0	0	0	0	0	0	0	0	2.11535e-05	0	0	0	0	0	0	-1	0	-1
Bacteria;Proteobacteria;Gammaproteobacteria;Alteromonadales;Alteromonadaceae;Alteromonas	0	0	0	0	0	1	0	0	0	0	0	0	0	0	0	0	0	0.000126151	0	0	0	0	0	0	0	0	-1	0	0	0	-1
Bacteria;Proteobacteria;Gammaproteobacteria;Enterobacteriales;Enterobacteriaceae;Buchnera	0	0	2	24	23	43	12	5	13	0	0	19	0	0	9.42551e-05	0.000948992	0.00107221	0.0054245	0.000558321	0.000261821	0.000481535	0	0	0.00282696	0	-1	-1	1	1	-1	-1
Bacteria;Proteobacteria;Gammaproteobacteria;Enterobacteriales;Enterobacteriaceae;Dickeya	0	0	8	21	9	3	14	14	12	4	0	7	0	0	0.000377021	0.000830368	0.000419561	0.000378453	0.000651375	0.000733099	0.000444494	4.2307e-05	0	0.00104151	0	-1	1	-1	1	-1	-1
Bacteria;Proteobacteria;Gammaproteobacteria;Enterobacteriales;Enterobacteriaceae;Escherichia	0	0	390	128	276	125	97	110	148	174	1	9	0	0	0.0183798	0.00506129	0.0128665	0.0157689	0.0045131	0.00576007	0.00548209	0.00184035	0.0001343	0.00133909	0	1	-1	-1	1	-1	-1
Bacteria;Proteobacteria;Gammaproteobacteria;Enterobacteriales;Enterobacteriaceae;Leclercia	0	0	18	22	24	9	18	11	14	15	0	3	0	0	0.000848296	0.000869909	0.00111883	0.00113536	0.000837482	0.000576007	0.000518576	0.000158651	0	0.000446362	0	-1	-1	1	1	-1	-1
Bacteria;Proteobacteria;Gammaproteobacteria;Oceanospirillales;unclassified_Oceanospirillales	0	0	6	16	16	4	12	22	14	11	0	3	0	0	0.000282765	0.000632661	0.000745886	0.000504605	0.000558321	0.00115201	0.000518576	0.000116344	0	0.000446362	0	-1	1	-1	1	-1	-1
Bacteria;Proteobacteria;Gammaproteobacteria;Pasteurellales;Pasteurellaceae;Actinobacillus	0	0	0	0	0	0	0	0	0	2	0	0	0	0	0	0	0	0	0	0	0	2.11535e-05	0	0	0	0	0	0	-1	0	-1
Bacteria;Proteobacteria;Gammaproteobacteria;Pasteurellales;Pasteurellaceae;Mannheimia	0	0	0	0	0	0	0	0	0	68	0	0	0	0	0	0	0	0	0	0	0	0.000719219	0	0	0	0	0	0	-1	0	-1
Bacteria;Proteobacteria;Gammaproteobacteria;Pseudomonadales;Moraxellaceae;unclassified_Moraxellaceae	0	0	0	0	0	0	0	0	0	1	0	0	0	0	0	0	0	0	0	0	0	1.05768e-05	0	0	0	0	0	0	-1	0	-1
Bacteria;Proteobacteria;Gammaproteobacteria;Pseudomonadales;Pseudomonadaceae;unclassified_Pseudomonadaceae	0	0	0	0	0	0	0	0	0	5	0	0	0	0	0	0	0	0	0	0	0	5.28838e-05	0	0	0	0	0	0	-1	0	-1
Bacteria;Proteobacteria;Gammaproteobacteria;Vibrionales;Vibrionaceae;unclassified_Vibrionaceae	0	0	0	0	0	1	0	0	0	0	0	0	0	0	0	0	0	0.000126151	0	0	0	0	0	0	0	0	-1	0	0	0	-1
Bacteria;Proteobacteria;Gammaproteobacteria;Xanthomonadales;Xanthomonadaceae;Hydrocarboniphaga	0	0	0	0	0	0	0	0	0	2	0	0	0	0	0	0	0	0	0	0	0	2.11535e-05	0	0	0	0	0	0	-1	0	-1
Bacteria;Proteobacteria;Gammaproteobacteria;Xanthomonadales;Xanthomonadaceae;Thermomonas	0	0	0	0	0	0	0	0	0	6	0	0	0	0	0	0	0	0	0	0	0	6.34605e-05	0	0	0	0	0	0	-1	0	-1
Bacteria;Actinobacteria;Actinobacteria;Actinobacteridae;Actinomycetales;unclassified_Actinomycetales	0	0	0	0	0	2	0	0	0	1	0	0	0	0	0	0	0	0.000252302	0	0	0	1.05768e-05	0	0	0	0	-1	0	-1	0	-2
Bacteria;Actinobacteria;Actinobacteria;Coriobacteridae;Coriobacteriales;Coriobacterineae;Coriobacteriaceae;Atopobium	0	3	1	1	0	0	0	0	0	2	0	5	0	0.000355198	4.71276e-05	3.95413e-05	0	0	0	0	0	2.11535e-05	0	0.000743937	-1	1	0	0	-1	-1	-2
Bacteria;Bacteroidetes;Bacteroidetes;Bacteroidales;Bacteroidaceae;Bacteroides	13	150	7	1	2	3	33	8	16	105	9	23	0.00419626	0.0177599	0.000329893	3.95413e-05	9.32357e-05	0.000378453	0.00153538	0.000418914	0.000592658	0.00111056	0.0012087	0.00342211	-1	1	-1	1	-1	-1	-2
Bacteria;Bacteroidetes;Bacteroidetes;Bacteroidales;Porphyromonadaceae;Parabacteroides	129	1114	0	5	0	2	4	0	0	356	167	4	0.0416398	0.131897	0	0.000197707	0	0.000252302	0.000186107	0	0	0.00376532	0.0224281	0.00059515	-1	-1	-1	1	-1	1	-2
Bacteria;Bacteroidetes;Sphingobacteria;Sphingobacteriales;Flexibacteraceae;Cytophaga	1	3	0	0	0	0	0	0	0	4	0	0	0.000322789	0.000355198	0	0	0	0	0	0	0	4.2307e-05	0	0	-1	0	0	0	-1	0	-2
Bacteria;Firmicutes;Bacilli;Lactobacillales;Lactobacillaceae;Lactobacillus	0	1	0	0	0	2	0	0	0	0	0	0	0	0.000118399	0	0	0	0.000252302	0	0	0	0	0	0	-1	0	-1	0	0	0	-2
Bacteria;Firmicutes;Clostridia;Clostridiales;Heliobacteriaceae;Heliorestis	0	2	0	0	0	0	0	0	0	1	0	0	0	0.000236798	0	0	0	0	0	0	0	1.05768e-05	0	0	-1	0	0	0	-1	0	-2
Bacteria;Firmicutes;Clostridia;Clostridiales;Veillonellaceae;Veillonella	0	0	0	0	0	4	0	0	0	1	0	0	0	0	0	0	0	0.000504605	0	0	0	1.05768e-05	0	0	0	0	-1	0	-1	0	-2
Bacteria;Proteobacteria;Gammaproteobacteria;Legionellales;Legionellaceae;unclassified_Legionellaceae	0	0	11	19	14	6	14	18	12	3	0	0	0	0	0.000518403	0.000751285	0.00065265	0.000756907	0.000651375	0.000942556	0.000444494	3.17303e-05	0	0	0	-1	-1	-1	1	0	-2
Bacteria;Proteobacteria;Gammaproteobacteria;Oceanospirillales;Halomonadaceae;Halomonas	0	0	2	3	1	2	3	3	5	3	0	0	0	0	9.42551e-05	0.000118624	4.66179e-05	0.000252302	0.00013958	0.000157093	0.000185206	3.17303e-05	0	0	0	-1	-1	-1	1	0	-2
Bacteria;Verrucomicrobia;Verrucomicrobiae;Verrucomicrobiales;Verrucomicrobiaceae;Akkermansia	0	3	0	0	0	0	0	1	0	0	0	0	0	0.000355198	0	0	0	0	0	5.23642e-05	0	0	0	0	-1	0	0	-1	0	0	-2
Bacteria;Actinobacteria;Actinobacteria;Coriobacteridae;Coriobacteriales;Coriobacterineae;Coriobacteriaceae;unclassified_Coriobacteriaceae	0	13	2	1	0	8	0	0	1	29	21	25	0	0.00153919	9.42551e-05	3.95413e-05	0	0.00100921	0	0	3.70412e-05	0.000306726	0.00282031	0.00371968	-1	1	-1	0	-1	-1	-3
Bacteria;Firmicutes;Clostridia;Clostridiales;Peptostreptococcaceae;unclassified_Peptostreptococcaceae	0	3	0	0	0	0	0	0	0	1	0	1	0	0.000355198	0	0	0	0	0	0	0	1.05768e-05	0	0.000148787	-1	0	0	0	-1	-1	-3
Bacteria;Firmicutes;Erysipelotrichi;Erysipelotrichales;Erysipelotrichaceae;Erysipelotrichaceae Incertae Sedis	0	0	0	3	0	1	0	0	0	0	0	406	0	0	0	0.000118624	0	0.000126151	0	0	0	0	0	0.0604077	0	-1	-1	0	0	-1	-3
Bacteria;Firmicutes;unclassified_Firmicutes	0	9	0	0	4	4	1	0	1	4	0	5	0	0.00106559	0	0	0.000186471	0.000504605	4.65268e-05	0	3.70412e-05	4.2307e-05	0	0.000743937	-1	0	-1	1	-1	-1	-3
Bacteria;Fusobacteria;Fusobacteria;Fusobacteriales;Fusobacteriaceae;Fusobacterium	0	4	0	13	0	0	1	0	0	20	0	2	0	0.000473597	0	0.000514037	0	0	4.65268e-05	0	0	0.000211535	0	0.000297575	-1	-1	0	1	-1	-1	-3
Bacteria;Firmicutes;Clostridia;Clostridiales;Lachnospiraceae;Roseburia	0	1	6	9	2	20	0	8	10	15	22	75	0	0.000118399	0.000282765	0.000355872	9.32357e-05	0.00252302	0	0.000418914	0.000370412	0.000158651	0.00295461	0.0111591	-1	-1	-1	-1	1	-1	-4
Bacteria;Actinobacteria;Actinobacteria;Coriobacteridae;Coriobacteriales;Coriobacterineae;Coriobacteriaceae;Collinsella	1062	3021	6	28	0	0	173	330	292	1647	14	839	0.342802	0.357684	0.000282765	0.00110716	0	0	0.00804913	0.0172802	0.010816	0.0174199	0.0018802	0.124833	-1	-1	0	-1	-1	-1	-5
Bacteria;Actinobacteria;Actinobacteria;Coriobacteridae;Coriobacteriales;Coriobacterineae;Coriobacteriaceae;Slackia	1	14	1	2	0	4	0	1	0	14	0	2	0.000322789	0.00165759	4.71276e-05	7.90826e-05	0	0.000504605	0	5.23642e-05	0	0.000148075	0	0.000297575	-1	-1	-1	-1	-1	-1	-6
